# Supplementary material for: Theoretical study on the mechanism of the hydrogen evolution reaction catalyzed by platinum subnanoclusters
Source: Royal Society of Chemistry journal article supplement (doi:10.1039/d2dt02645g), 2022-11-24
Supplement: d2dt02645g1.pdf [file d2dt02645g1.pdf]

## Supporting information

# Theoretical study on the mechanism of hydrogen evolution reaction catalyzed by platinum subnanoclusters

Keita Kuge, Kosei Yamauchi, and Ken Sakai\*

Department of Chemistry, Faculty of Science, Kyushu University, Motooka 744, Nishi-ku, Fukuoka 819-0395, Japan.

E-mail: [ksakai@chem.kyushu-univ.jp](mailto:ksakai@chem.kyushu-univ.jp)

**Table S1.** Summary of the Gibbs free energies computed for the acid and base forms, which were used to calculate the corresponding  $pK_a$  values.

| Compound                                                                            | Gibbs energy in vacuo<br>(kcal/mol) | Gibbs energy in C-PCM<br>(kcal/mol) |
|-------------------------------------------------------------------------------------|-------------------------------------|-------------------------------------|
| pyridinium (Hpy <sup>+</sup> )                                                      | -155873.2103                        | -155926.1802                        |
| pyridine (py)                                                                       | -155652.7957                        | -155656.2909                        |
| <i>trans</i> -[Pt(NH <sub>3</sub> ) <sub>2</sub> Cl(OH <sub>2</sub> )] <sup>+</sup> | -482414.2236                        | -482477.4001                        |
| <i>trans</i> -[Pt(NH <sub>3</sub> ) <sub>2</sub> Cl(OH)]                            | -482185.2842                        | -482202.7892                        |
| <i>cis</i> -[Pt(NH <sub>3</sub> ) <sub>2</sub> Cl(OH <sub>2</sub> )] <sup>+</sup>   | -482412.0349                        | -482475.2967                        |
| <i>cis</i> -[Pt(NH <sub>3</sub> ) <sub>2</sub> Cl(OH)]                              | -482179.5788                        | -482200.1009                        |
| triethylammonium (HNEt <sub>3</sub> <sup>+</sup> )                                  | -183482.3596                        | -183530.5787                        |
| triethylamine (NEt <sub>3</sub> )                                                   | -183254.1049                        | -183252.2556                        |
| pyrrolidinium (H <sub>2</sub> NC <sub>4</sub> H <sub>8</sub> <sup>+</sup> )         | -133466.1196                        | -133521.9867                        |
| pyrrolidine (HNC <sub>4</sub> H <sub>8</sub> )                                      | -133241.3212                        | -133243.7227                        |
| guanidinium (H <sub>2</sub> NC(NH <sub>2</sub> ) <sub>2</sub> <sup>+</sup> )        | -129009.9552                        | -129068.5156                        |
| guanidine (HNC(NH <sub>2</sub> ) <sub>2</sub> )                                     | -128773.5347                        | -128782.6417                        |

**Table S2.** Summary of the calculated and experimental  $pK_a$  values for several monocationic acids used in benchmarking the individual  $pK_a$  values in this study.

| Acid                                                                                | Calculated $pK_a$ | Experimental $pK_a$ |
|-------------------------------------------------------------------------------------|-------------------|---------------------|
| pyridinium (Hpy <sup>+</sup> )                                                      | 4.32              | 5.24 <sup>S1</sup>  |
| <i>trans</i> -[Pt(NH <sub>3</sub> ) <sub>2</sub> Cl(OH <sub>2</sub> )] <sup>+</sup> | 7.77              | 5.63 <sup>S2</sup>  |
| <i>cis</i> -[Pt(NH <sub>3</sub> ) <sub>2</sub> Cl(OH <sub>2</sub> )] <sup>+</sup>   | 8.20              | 6.85 <sup>S3</sup>  |
| triethylammonium (HNEt <sub>3</sub> <sup>+</sup> )                                  | 9.14              | 10.75 <sup>S1</sup> |
| pyrrolidinium (H <sub>2</sub> NC <sub>4</sub> H <sub>8</sub> <sup>+</sup> )         | 10.5              | 11.27 <sup>S1</sup> |
| guanidinium (H <sub>2</sub> NC(NH <sub>2</sub> ) <sub>2</sub> <sup>+</sup> )        | 16.0              | 13.60 <sup>S1</sup> |

**Table S3.** Summary of the Gibbs free energies computed for six redox couples, which were used to calculate the corresponding redox potentials.

| Compound                                                                                                                                                      | Gibbs energy in vacuo<br>(kcal/mol) | Gibbs energy in C-PCM<br>(kcal/mol) |
|---------------------------------------------------------------------------------------------------------------------------------------------------------------|-------------------------------------|-------------------------------------|
| MV <sup>2+</sup> (1,1'-dimethyl-4,4'-bipyridinium)                                                                                                            | -360216.2137                        | -360365.7523                        |
| MV <sup>+•</sup>                                                                                                                                              | -360425.2045                        | -360463.9381                        |
| MV <sup>0</sup>                                                                                                                                               | -360538.0401                        | -360544.1928                        |
| I <sub>3</sub> <sup>-</sup>                                                                                                                                   | -21599.9071                         | -21558.53979                        |
| I <sub>2</sub>                                                                                                                                                | -14311.35318                        | -14310.07494                        |
| I <sup>-</sup>                                                                                                                                                | -7206.363165                        | -7265.269778                        |
| [Pt(III) <sub>2</sub> (NH <sub>3</sub> ) <sub>4</sub> (μ-α-pyrro) <sub>2</sub> (OH <sub>2</sub> ) <sub>2</sub> ] <sup>4+</sup><br>(α-pyrro = α-pyrrolidonato) | -745202.2162                        | -745779.6767                        |
| [Pt(II) <sub>2</sub> (NH <sub>3</sub> ) <sub>4</sub> (μ-α-pyrro) <sub>2</sub> ] <sup>2+</sup>                                                                 | -650037.2813                        | -650186.3355                        |
| {[Pt(III) <sub>2</sub> (NH <sub>3</sub> ) <sub>4</sub> (μ-α-pyrro) <sub>2</sub> (OH <sub>2</sub> ) <sub>2</sub> Cl <sub>2</sub> ] <sup>2+</sup> }             | -1323385.037                        | -1323565.791                        |
| {[Pt(II) <sub>2</sub> (NH <sub>3</sub> ) <sub>4</sub> (μ-α-pyrro) <sub>2</sub> Cl <sub>2</sub> }                                                              | -1227928.919                        | -1227961.666                        |
| H <sub>2</sub> O                                                                                                                                              | -47935.46075                        | -47940.82847                        |

**Table S4.** Summary of the calculated and experimental redox potentials used in benchmarking the individual redox potentials in this study.

| Redox couple                                                                                                                                                                                                                                                              | Calculated potential<br>(V) | Experimental potential<br>(V vs. NHE) |
|---------------------------------------------------------------------------------------------------------------------------------------------------------------------------------------------------------------------------------------------------------------------------|-----------------------------|---------------------------------------|
| MV <sup>2+</sup> / MV <sup>+•</sup>                                                                                                                                                                                                                                       | 4.22                        | -0.450 <sup>S4</sup>                  |
| MV <sup>+•</sup> / MV <sup>0</sup>                                                                                                                                                                                                                                        | 3.44                        | -0.816 <sup>S4</sup>                  |
| I <sub>2</sub> / 2I <sup>-</sup>                                                                                                                                                                                                                                          | 4.72                        | 0.623 <sup>S5</sup>                   |
| I <sub>3</sub> <sup>-</sup> / 3I <sup>-</sup>                                                                                                                                                                                                                             | 4.21                        | 0.536 <sup>S6</sup>                   |
| [Pt(III) <sub>2</sub> (NH <sub>3</sub> ) <sub>4</sub> (μ-α-pyrro) <sub>2</sub> (OH <sub>2</sub> ) <sub>2</sub> ] <sup>4+</sup> /<br>[Pt(II) <sub>2</sub> (NH <sub>3</sub> ) <sub>4</sub> (μ-α-pyrro) <sub>2</sub> ] <sup>2+</sup> + 2H <sub>2</sub> O                     | 6.21 <sup>a</sup>           | 0.774 <sup>S7</sup>                   |
| {[Pt(III) <sub>2</sub> (NH <sub>3</sub> ) <sub>4</sub> (μ-α-pyrro) <sub>2</sub> (OH <sub>2</sub> ) <sub>2</sub> Cl <sub>2</sub> ] <sup>2+</sup> /<br>{[Pt(II) <sub>2</sub> (NH <sub>3</sub> ) <sub>4</sub> (μ-α-pyrro) <sub>2</sub> Cl <sub>2</sub> } + 2H <sub>2</sub> O | 5.98 <sup>a</sup>           | 0.774 <sup>S7</sup>                   |

<sup>a</sup> The two-electron one-step oxidation-reduction potential of the diaqua-coordinated Pt(III)<sub>2</sub> dimer was computed in two different models. One was computed without discharging the system, while the other was computed by making efforts to decrease the total positive charge by locating two chloride ions beside the dimeric unit. Empirically, the more realistic structures are known to be given by discharging the model systems due to the suppression of excessive Coulombic repulsion between the two positively charged platinum(II or III) coordination planes within the dimeric unit.

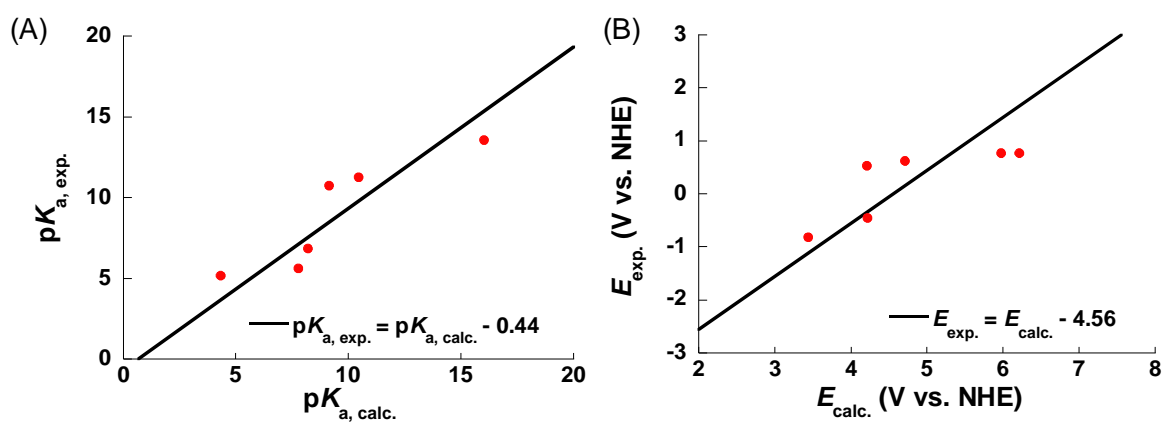

**Fig. S1** Correlations between the calculated and experimental values for the  $pK_a$  values (A) and the redox potentials (B), where the red plots correspond to the values in Tables S2 and S4.

**Table S5.** Summary of the Pt-Pt bond lengths ( $\text{\AA}$ ) computed for the neutral  $\text{Pt}^0_n$  subnanocluster models ( $n = 2-5$ ). See also Fig. 2.

|                | [Pt <sub>2</sub> ] | [Pt <sub>3</sub> ] | [Pt <sub>4</sub> ] | [Pt <sub>5</sub> ] |
|----------------|--------------------|--------------------|--------------------|--------------------|
| Pt1-Pt2        | 2.396              | 2.538              | 2.631              | 2.692              |
| Pt1-Pt3        |                    | 2.538              | 2.631              | 2.692              |
| Pt2-Pt3        |                    | 2.538              | 2.723              | -                  |
| Pt1-Pt4        |                    |                    | 2.631              | -                  |
| Pt2-Pt4        |                    |                    | 2.725              | 2.693              |
| Pt3-Pt4        |                    |                    | 2.721              | 2.693              |
| Pt1-Pt5        |                    |                    |                    | 2.651              |
| Pt2-Pt5        |                    |                    |                    | 2.727              |
| Pt3-Pt5        |                    |                    |                    | 2.727              |
| Pt4-Pt5        |                    |                    |                    | 2.692              |
| Averaged Pt-Pt | 2.396              | 2.538              | 2.677              | 2.690              |

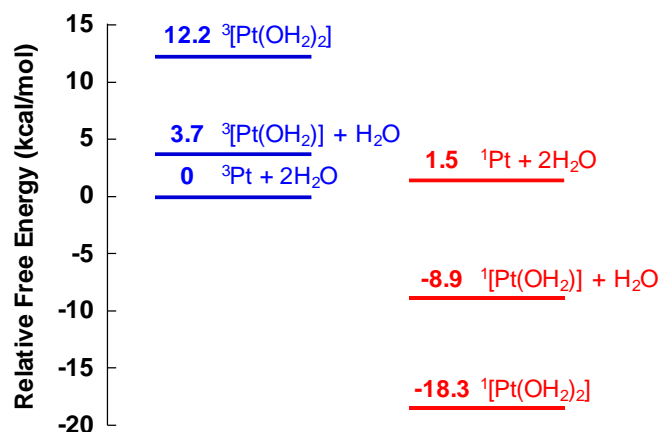

**Fig. S2** Comparison of the free energies of the triplet (left) and singlet (right) states of the Pt(0) system in aqueous media, corresponding to the initial state before promoting either PT or ET.

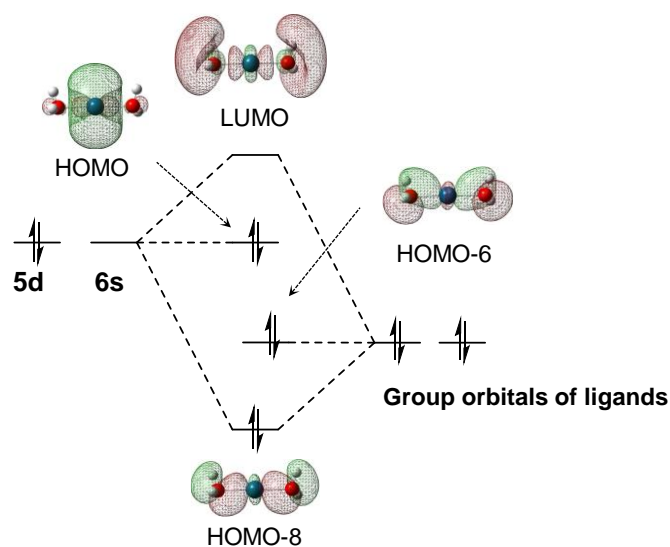

**Fig. S3** Schematic diagram for the molecular orbitals (MOs) computed for  $1[\text{Pt}(\text{OH}_2)_2]$  in aqueous media (C-PCM). The Pt-O bonds are judged to be given on the basis of the hybridization of 6s and 5d orbitals (i.e., sd-hybrid orbitals). Only a single bonding orbital is achieved so that the bond order for each Pt-O bond is regarded as 0.5. In other words, the two aqua donors provide two electron pairs as the source of donors but, by forming a non-bonding orbital derived from these donors (HOMO-6), only a single bond is achieved in total.

**Table S6.** The structure of Pt<sub>13</sub> (triplet) optimized at the M06 level of DFT using SDD(Pt) basis set in vacuo. The structure was defined using the Z-matrix format in Gaussian and was forced to possess a cuboctahedral geometry in its highest symmetry so that all the Pt-Pt distances were defined with a common variable, which converged at 2.785 Å. This value is nearly consistent with the crystallographically determined Pt-Pt distance for the bulk platinum (2.775 Å).<sup>S8</sup>

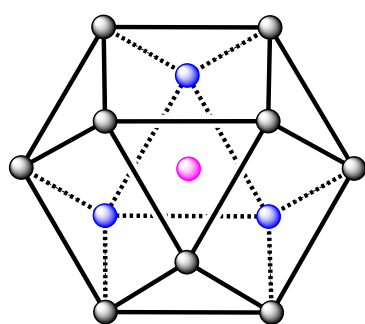

**Cuboctahedron**

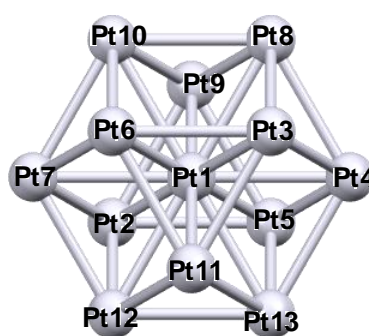

Pt-Pt = **2.785 Å** (For all Pt-Pt)

| Atom Label | X in angstrom | Y in angstrom | Z in angstrom |
|------------|---------------|---------------|---------------|
| Pt1        | 0.000000      | 0.000000      | 0.000000      |
| Pt2        | -1.969224     | 0.000000      | 1.969224      |
| Pt3        | 0.000000      | 1.969224      | 1.969224      |
| Pt4        | 1.969224      | 1.969224      | 0.000000      |
| Pt5        | 1.969224      | 0.000000      | -1.969224     |
| Pt6        | 0.000000      | -1.969224     | -1.969224     |
| Pt7        | -1.969224     | -1.969224     | 0.000000      |
| Pt8        | -1.969224     | 1.969224      | 0.000000      |
| Pt9        | 0.000000      | 1.969224      | -1.969224     |
| Pt10       | -1.969224     | 0.000000      | -1.969224     |
| Pt11       | 1.969224      | 0.000000      | 1.969224      |
| Pt12       | 1.969224      | -1.969224     | 0.000000      |
| Pt13       | 0.000000      | -1.969224     | 1.969224      |

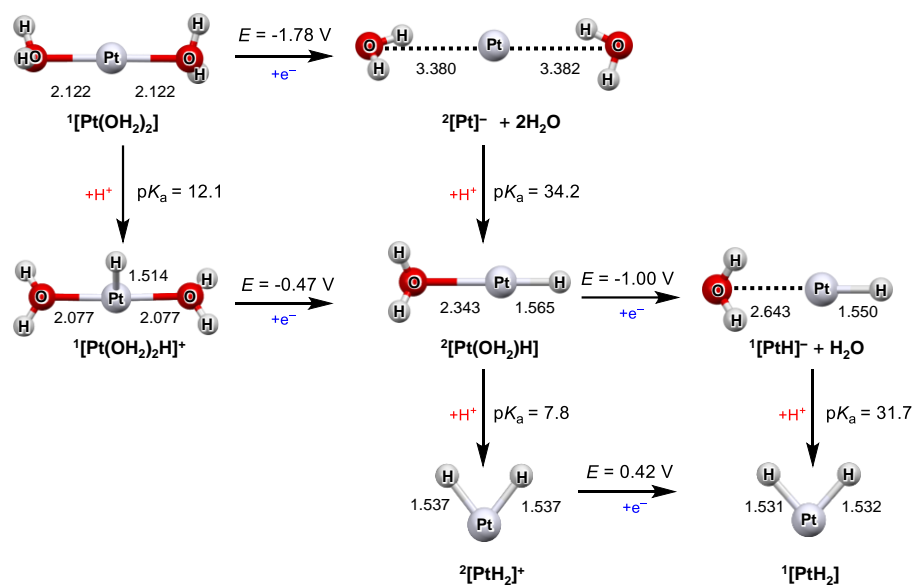

**Fig. S4** Square schemes developed for the Pt<sub>1</sub> system, where the redox potentials are given in V vs. NHE. The structural variations during the course of reactions are also shown.

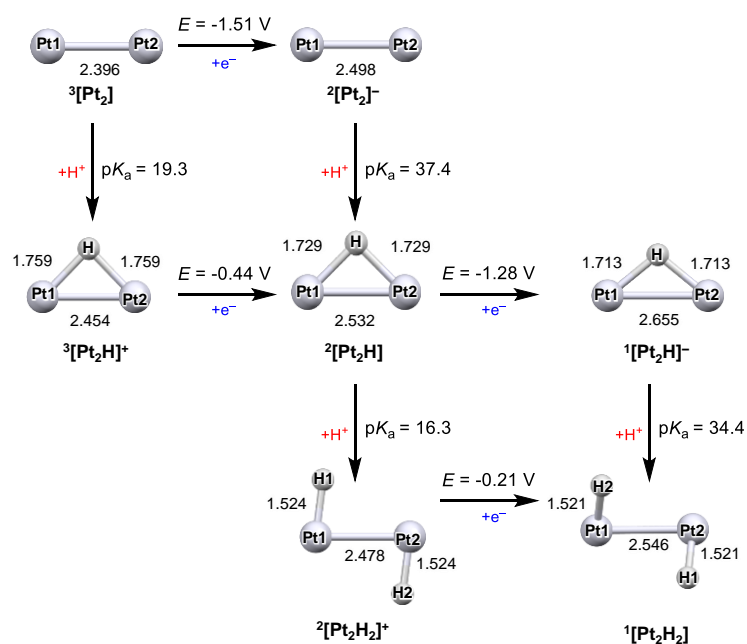

**Fig. S5** Square schemes for the Pt<sub>2</sub> system, where the redox potentials are given in V vs. NHE. The structural variations during the course of reactions are also shown.

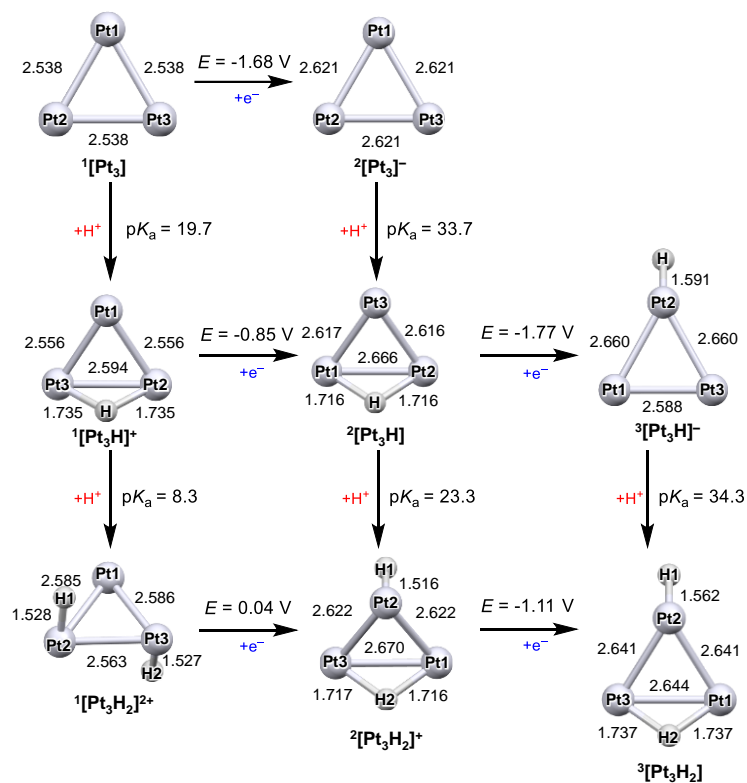

**Fig. S6** Square schemes for the Pt<sub>3</sub> system, where the redox potentials are given in V vs. NHE. The structural variations during the course of reactions are also shown.

**Table S7.** Summary of the Gibbs free energies computed for the chemical species adopted to estimate the  $pK_a$  values of [Pt<sub>4</sub>H]<sup>+</sup>, [Pt<sub>5</sub>H]<sup>+</sup> and [Pt<sub>6</sub>H]<sup>+</sup>. The resulting  $pK_a$  values are also summarized.

| Compound                                           | Gibbs energy in vacuo (kcal/mol) | Gibbs energy in C-PCM (kcal/mol) |
|----------------------------------------------------|----------------------------------|----------------------------------|
| [Pt <sub>4</sub> H] <sup>+</sup> ( $pK_a = 27.0$ ) | -299810.468                      | -299931.584                      |
| [Pt <sub>4</sub> ]                                 | -299605.163                      | -299630.124                      |
| [Pt <sub>5</sub> H] <sup>+</sup> ( $pK_a = 26.5$ ) | -374718.129                      | -374841.590                      |
| [Pt <sub>5</sub> ]                                 | -374513.979                      | -374540.872                      |
| [Pt <sub>6</sub> H] <sup>+</sup> ( $pK_a = 28.4$ ) | -449629.683                      | -449753.421                      |
| [Pt <sub>6</sub> ]                                 | -449427.965                      | -449450.117                      |



**Table S8.** The selected Pt-H vibrational frequencies ( $\text{cm}^{-1}$ ) computed for some important intermediates appearing in the successive PT and ET steps for the  $\text{Pt}_1$  model. The values in parentheses correspond to the oscillator strengths.

| $^1[\text{Pt}(\text{OH}_2)_2\text{H}]^+$ |          | $^2[\text{Pt}(\text{OH}_2)\text{H}]$ |          | $^2[\text{PtH}_2]^+$ |         |
|------------------------------------------|----------|--------------------------------------|----------|----------------------|---------|
| 245.58 <sup>a</sup>                      | (7.73)   | 239.41 <sup>a</sup>                  | (32.99)  | 765.37 <sup>a</sup>  | (15.48) |
| 736.76 <sup>a</sup>                      | (90.96)  | 251.99 <sup>a</sup>                  | (60.76)  | 2343.45 <sup>b</sup> | (35.58) |
| 766.80 <sup>a</sup>                      | (8.42)   | 337.97 <sup>a</sup>                  | (234.44) | 2391.68 <sup>b</sup> | (11.39) |
| 2422.09 <sup>b</sup>                     | (44.55)  | 461.31 <sup>a</sup>                  | (239.80) |                      |         |
|                                          |          | 535.63 <sup>a</sup>                  | (81.49)  |                      |         |
|                                          |          | 2108.22 <sup>b</sup>                 | (613.35) |                      |         |
| $^1[\text{PtH}_2]$                       |          | $^1[\text{PtH}_3]^+$                 |          |                      |         |
| 824.39 <sup>a</sup>                      | (4.23)   | 879.01 <sup>a</sup>                  | (8.25)   |                      |         |
| 2335.85 <sup>b</sup>                     | (222.55) | 893.54 <sup>a</sup>                  | (7.50)   |                      |         |
| 2401.41 <sup>b</sup>                     | (81.65)  | 1002.71 <sup>a</sup>                 | (31.65)  |                      |         |
|                                          |          | 2406.44 <sup>b</sup>                 | (4.11)   |                      |         |
|                                          |          | 2429.42 <sup>b</sup>                 | (9.20)   |                      |         |
|                                          |          | 2460.65 <sup>b</sup>                 | (6.03)   |                      |         |

<sup>a</sup> Bending. <sup>b</sup> Stretching.

**Table S9.** The selected Pt-H vibrational frequencies ( $\text{cm}^{-1}$ ) computed for some important intermediates appearing in the successive PT and ET steps for the  $\text{Pt}_2$  model. The values in parentheses correspond to the oscillator strengths.

| $^3[\text{Pt}_2\text{H}]^+$   |          | $^2[\text{Pt}_2\text{H}]$     |          | $^2[\text{Pt}_2\text{H}_2]^+$ |           |
|-------------------------------|----------|-------------------------------|----------|-------------------------------|-----------|
| 631.72 <sup>a</sup>           | (311.20) | 680.92 <sup>a</sup>           | (2.32)   | 262.52 <sup>c</sup>           | (93.60)   |
| 1610.04 <sup>b</sup>          | (136.60) | 1607.57 <sup>b</sup>          | (235.94) | 2394.32 <sup>b</sup>          | (181.90)  |
| $^1[\text{Pt}_2\text{H}_2]$   |          | $^1[\text{Pt}_2\text{H}_3]^+$ |          | $^2[\text{Pt}_2\text{H}_3]$   |           |
| 389.42 <sup>c</sup>           | (166.15) | 346.27 <sup>c</sup>           | (110.74) | 258.3 <sup>c</sup>            | (200.58)  |
| 475.42 <sup>c</sup>           | (138.58) | 530.55 <sup>c</sup>           | (22.82)  | 512.12 <sup>c</sup>           | (3117.75) |
| 504.35 <sup>c</sup>           | (0.49)   | 778.82 <sup>c</sup>           | (57.80)  | 636.78 <sup>c</sup>           | (12.92)   |
| 2362.60 <sup>b</sup>          | (91.38)  | 892.72 <sup>c</sup>           | (14.26)  | 885.38 <sup>a</sup>           | (2322.05) |
| 2364.77 <sup>b</sup>          | (265.61) | 2361.8 <sup>b</sup>           | (37.93)  | 1376.09 <sup>b</sup>          | (49.69)   |
|                               |          | 2409.08 <sup>b</sup>          | (21.98)  | 2232.41 <sup>b</sup>          | (1938.56) |
|                               |          | 2439.87 <sup>b</sup>          | (118.01) | 2301.55 <sup>b</sup>          | (8.42)    |
| $^2[\text{Pt}_2\text{H}_4]^+$ |          | $^1[\text{Pt}_2\text{H}_4]$   |          | $^1[\text{Pt}_2\text{H}_5]^+$ |           |
| 237.63 <sup>c</sup>           | (172.74) | 234.85 <sup>c</sup>           | (22.15)  | 218.61 <sup>c</sup>           | (41.53)   |
| 351.25 <sup>c</sup>           | (217.12) | 298.73 <sup>c</sup>           | (148.31) | 369.93 <sup>c</sup>           | (102.57)  |
| 397.33 <sup>c</sup>           | (23.42)  | 707.09 <sup>c</sup>           | (93.08)  | 648.49 <sup>c</sup>           | (43.26)   |
| 491.23 <sup>c</sup>           | (179.38) | 794.13 <sup>c</sup>           | (55.64)  | 703.94 <sup>c</sup>           | (8.33)    |
| 535.67 <sup>c</sup>           | (0.10)   | 1058.19 <sup>b</sup>          | (480.74) | 746.90 <sup>c</sup>           | (9.53)    |
| 895.51 <sup>c</sup>           | (53.23)  | 1784.31 <sup>b</sup>          | (91.00)  | 902.06 <sup>c</sup>           | (126.26)  |
| 910.19 <sup>c</sup>           | (5.81)   | 1878.13 <sup>b</sup>          | (54.77)  | 2243.62 <sup>b</sup>          | (36.14)   |
| 2320.68 <sup>b</sup>          | (13.88)  | 2108.03 <sup>b</sup>          | (456.70) | 2284.76 <sup>b</sup>          | (273.43)  |
| 2329.55 <sup>b</sup>          | (197.29) | 2342.59 <sup>b</sup>          | (60.25)  | 2359.55 <sup>b</sup>          | (89.09)   |
| 2389.60 <sup>b</sup>          | (46.74)  |                               |          | 2401.64 <sup>b</sup>          | (30.07)   |
| 2395.85 <sup>b</sup>          | (13.58)  |                               |          | 2439.57 <sup>b</sup>          | (13.86)   |

<sup>a</sup> Sliding. <sup>b</sup> Stretching. <sup>c</sup> Bending.

**Table S10.** The Pt-H vibrational frequencies ( $\text{cm}^{-1}$ ) computed for some important intermediates appearing in the successive PT and ET steps for the  $\text{Pt}_3$  model. The values in parentheses correspond to the oscillator strengths.

| $^1[\text{Pt}_3\text{H}]^+$   |          | $^2[\text{Pt}_3\text{H}]$ |          | $^1[\text{Pt}_3\text{H}_2]^{2+}$ |         |
|-------------------------------|----------|---------------------------|----------|----------------------------------|---------|
| 631.68 <sup>a</sup>           | (69.54)  | 586.57 <sup>a</sup>       | (124.69) | 383.07 <sup>c</sup>              | (41.25) |
| 740.98 <sup>a</sup>           | (364.94) | 1026.53 <sup>a</sup>      | (837.48) | 466.61 <sup>c</sup>              | (17.75) |
| 1581.93 <sup>b</sup>          | (118.83) | 1465.51 <sup>b</sup>      | (120.93) | 579.00 <sup>c</sup>              | (46.51) |
|                               |          |                           |          | 978.66 <sup>c</sup>              | (22.42) |
|                               |          |                           |          | 2278.53 <sup>b</sup>             | (27.31) |
|                               |          |                           |          | 2323.48 <sup>b</sup>             | (28.74) |
| $^2[\text{Pt}_3\text{H}_2]^+$ |          | $[\text{Pt}_3\text{H}_2]$ |          |                                  |         |
| 260.85 <sup>c</sup>           | (97.59)  | 489.29 <sup>c</sup>       | (627.16) |                                  |         |
| 645.90 <sup>a</sup>           | (106.69) | 562.90 <sup>a</sup>       | (125.61) |                                  |         |
| 966.46 <sup>a</sup>           | (628.09) | 1053.20 <sup>a</sup>      | (218.68) |                                  |         |
| 1493.87 <sup>b</sup>          | (118.71) | 1459.55 <sup>b</sup>      | (215.64) |                                  |         |
| 2447.01 <sup>b</sup>          | (69.00)  | 2060.89 <sup>b</sup>      | (435.39) |                                  |         |

<sup>a</sup> Sliding. <sup>b</sup> Stretching <sup>c</sup> Bending.

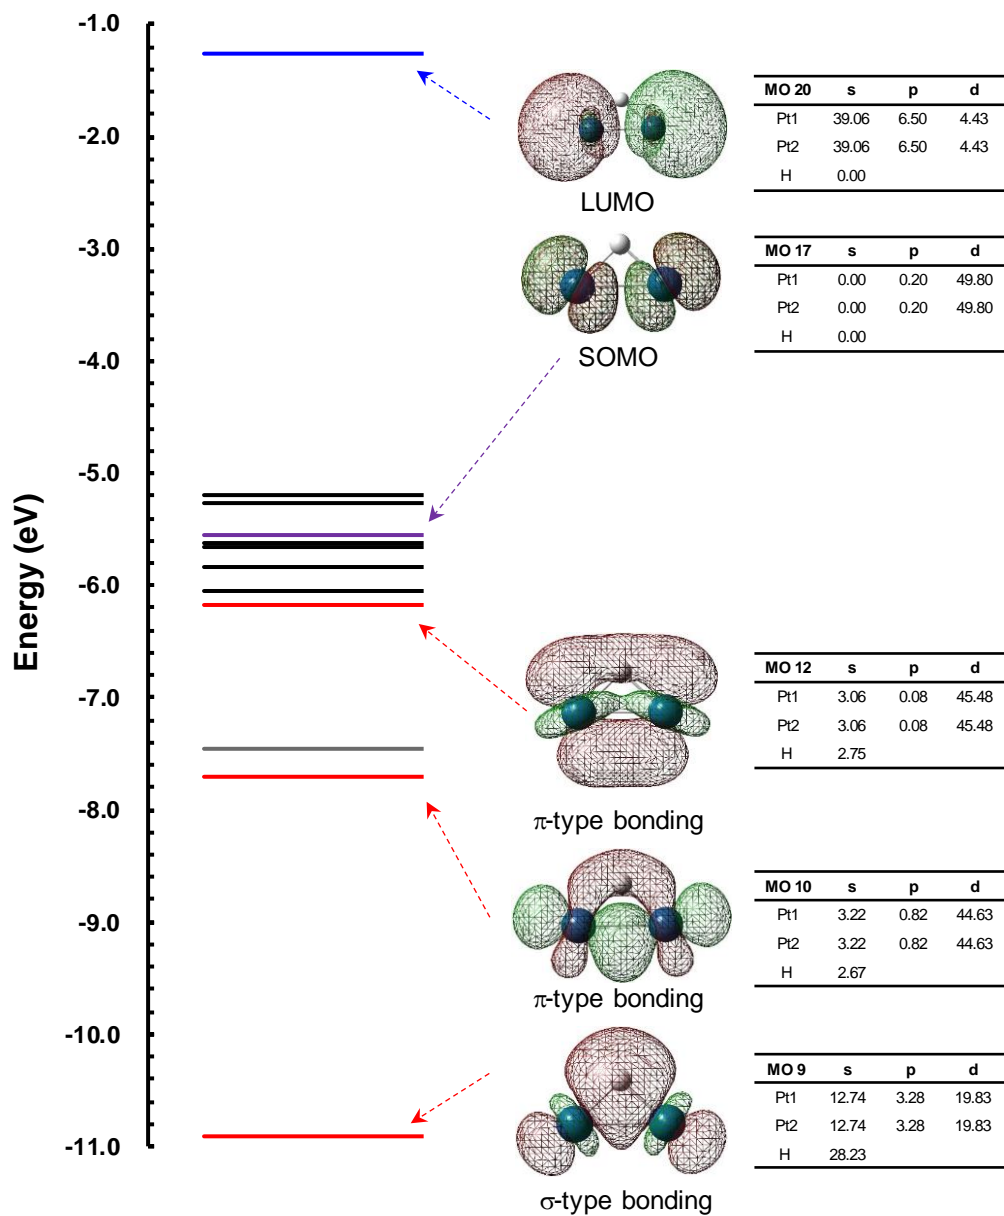

**Fig. S7** The selected  $\alpha$ -MOs of  $^2[\text{Pt}_2\text{H}]$  correlated with the Pt-H bond, including its SOMO. The contributions (%) for all the s-, p- and d-based atomic orbitals (AOs) of Pt and H atoms are also shown.

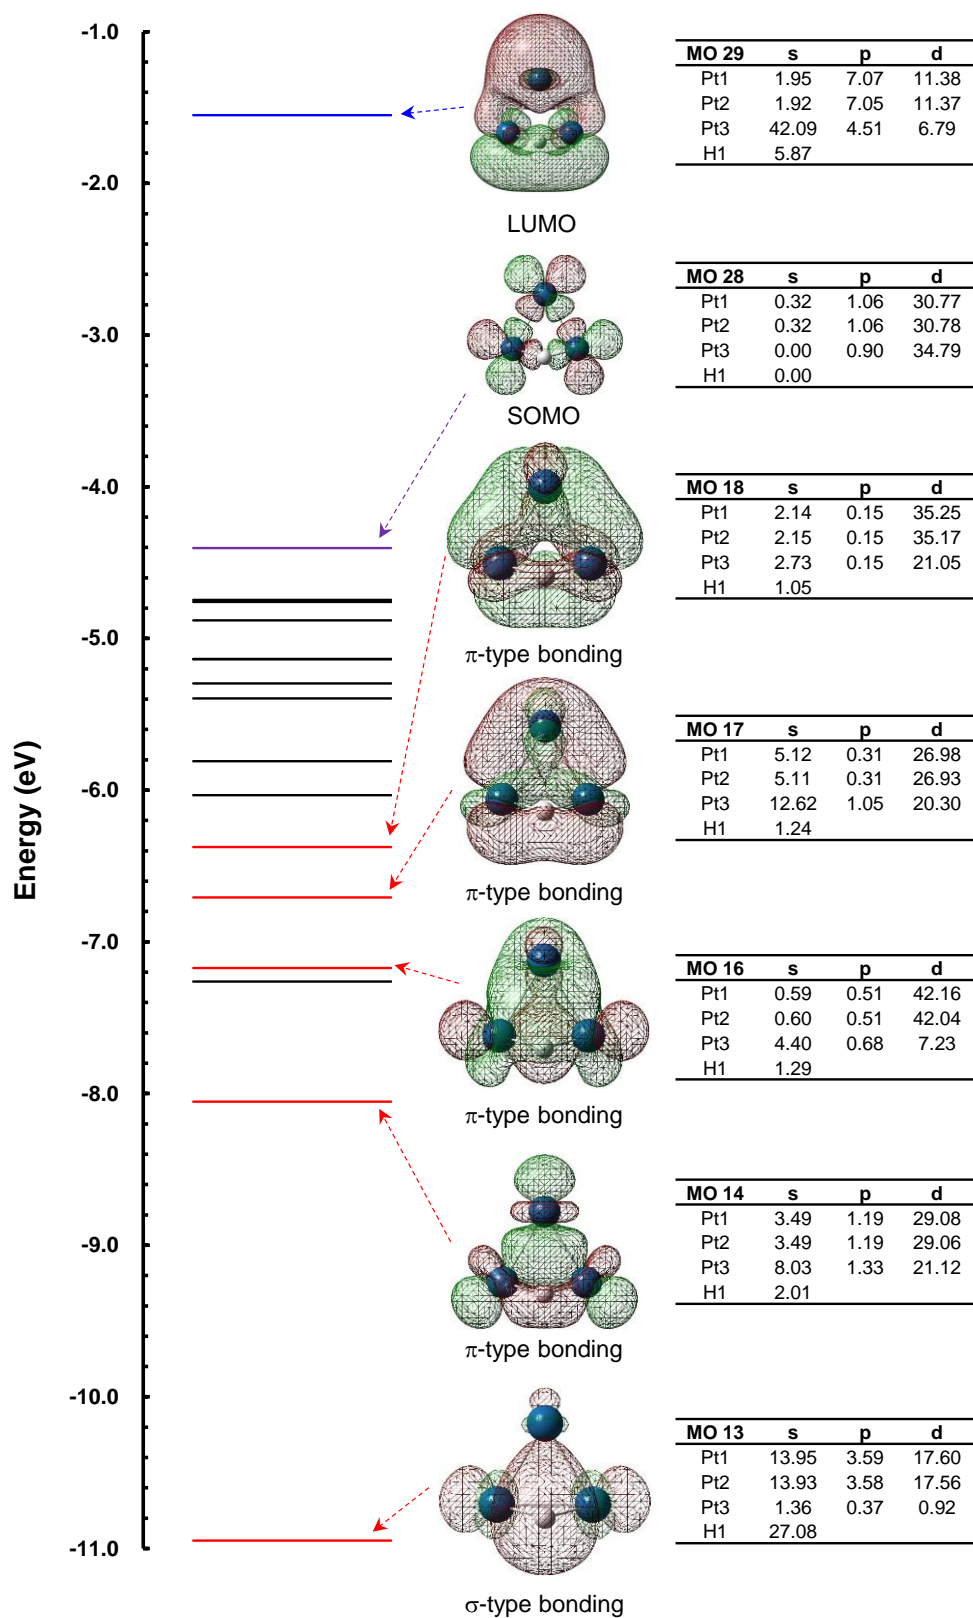

**Fig. S8** The selected  $\alpha$ -MOs of  $^2[\text{Pt}_3\text{H}]$  correlated with the Pt-H bond, including its SOMO. The contributions (%) for all the s-, p- and d-based AOs of Pt and H atoms are also shown.

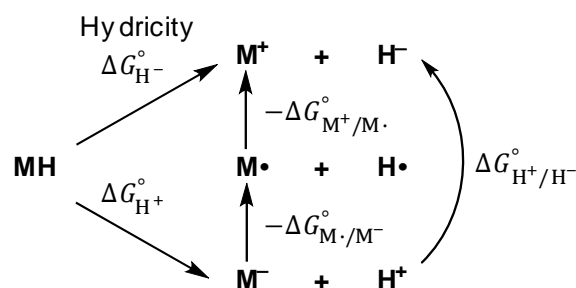

**Scheme S1.** Thermodynamic cycles for estimating the thermodynamic hydricity ( $\Delta G_{H^-}^{\circ}$ ), where  $R$  is the gas constant,  $T$  is the temperature in Kelvin (298.15 K),  $F$  is the Faraday constant, and  $\Delta G_{H^+/H^-}^{\circ}$  is the free energy change for the reduction of  $H^+$  to  $H^-$  in water, reported as 34.2 kcal/mol.<sup>S9</sup> The computed values for  $pK_a$  and redox potentials were used as follows.

$$\Delta G_{H^-}^{\circ} = \Delta G_{H^+}^{\circ} - \Delta G_{M^{\bullet}/M^-}^{\circ} - \Delta G_{M^+/M^{\bullet}}^{\circ} + \Delta G_{H^+/H^-}^{\circ}$$

$$\Delta G_{H^-}^{\circ} = RT \ln(10) pK_a + FE_{M^{\bullet}/M^-}^{\circ} + FE_{M^+/M^{\bullet}}^{\circ} + \Delta G_{H^+/H^-}^{\circ}$$

**Table S11.** Summary of the thermodynamic hydricity ( $\Delta G_{H^-}$ ) values,  $pK_a$  values, and redox potentials.

| Compound (MH)                                      | $\Delta G_{H^-}$ (kcal/mol) | $pK_a$ | Redox potential $E(M^{\bullet}/M^-)$ (V vs. NHE) | Redox potential $E(M^+/M^{\bullet})$ (V vs. NHE) |
|----------------------------------------------------|-----------------------------|--------|--------------------------------------------------|--------------------------------------------------|
| [Pt(OH <sub>2</sub> ) <sub>2</sub> H] <sup>+</sup> | 78.9                        | 12.1   | 0.13                                             | 1.09                                             |
| [Pt(OH <sub>2</sub> )H]                            | 43.2                        | 38.4   | -1.52                                            | -0.36                                            |
| [PtH <sub>2</sub> ] <sup>+</sup>                   | 85.2                        | 10.8   | -0.05                                            | 1.62                                             |
| [PtH <sub>2</sub> ]                                | 57.4                        | 32.3   | -0.86                                            | -0.05                                            |
| [PtH <sub>3</sub> ] <sup>+</sup>                   | 92.9                        | 1.5    | 0.41                                             | 2.04                                             |
| [Pt <sub>2</sub> H] <sup>+</sup>                   | 67.7                        | 19.3   | 0.56                                             | -0.25                                            |
| [Pt <sub>2</sub> H]                                | 63.3                        | 37.4   | -1.51                                            | 0.56                                             |
| [Pt <sub>2</sub> H <sub>2</sub> ] <sup>+</sup>     | 78.6                        | 16.3   | -0.44                                            | 1.40                                             |
| [Pt <sub>2</sub> H <sub>2</sub> ]                  | 41.4                        | 34.4   | -1.28                                            | -0.44                                            |
| [Pt <sub>2</sub> H <sub>3</sub> ] <sup>+</sup>     | 72.8                        | 10.1   | -0.21                                            | 1.28                                             |
| [Pt <sub>2</sub> H <sub>3</sub> ]                  | 25.3                        | 23.1   | -1.55                                            | -0.21                                            |
| [Pt <sub>2</sub> H <sub>4</sub> ] <sup>+</sup>     | 51.1                        | 14.6   | -0.78                                            | 0.65                                             |
| [Pt <sub>2</sub> H <sub>4</sub> ]                  | 28.7                        | 21.8   | -0.75                                            | -0.78                                            |
| [Pt <sub>2</sub> H <sub>5</sub> ] <sup>+</sup>     | 43.6                        | 4.8    | -0.32                                            | 0.45                                             |
| [Pt <sub>3</sub> H] <sup>+</sup>                   | 77.0                        | 19.7   | -0.63                                            | 1.32                                             |
| [Pt <sub>3</sub> H]                                | 26.9                        | 33.7   | -1.68                                            | -0.63                                            |
| [Pt <sub>3</sub> H <sub>2</sub> ] <sup>+</sup>     | 64.2                        | 23.3   | -0.85                                            | 0.77                                             |
| [Pt <sub>3</sub> H <sub>2</sub> ]                  | 20.6                        | 34.3   | -1.77                                            | -0.85                                            |
| [Pt <sub>3</sub> H <sub>3</sub> ] <sup>+</sup>     | 28.3                        | 13.8   | -1.11                                            | 0.04                                             |
| [Pt <sub>3</sub> H <sub>3</sub> ]                  | 19.8                        | 28.1   | -1.18                                            | -1.11                                            |
| [Pt <sub>3</sub> H <sub>4</sub> ] <sup>+</sup>     | 19.3                        | 7.8    | -0.33                                            | -0.78                                            |
| [Pt <sub>3</sub> H <sub>4</sub> ]                  | 37.5                        | 24.7   | -0.99                                            | -0.33                                            |
| [Pt <sub>3</sub> H <sub>5</sub> ] <sup>+</sup>     | 25.1                        | 0.6    | 0.01                                             | -0.44                                            |
| [Pt <sub>3</sub> H <sub>5</sub> ]                  | 33.7                        | 22.4   | -1.36                                            | 0.01                                             |
| [Pt <sub>3</sub> H <sub>6</sub> ] <sup>+</sup>     | 40.4                        | 8.5    | -0.08                                            | -0.15                                            |

|                                                |      |      |       |       |
|------------------------------------------------|------|------|-------|-------|
| [Pt <sub>3</sub> H <sub>6</sub> ]              | 34.9 | 12.3 | -0.62 | -0.08 |
| [Pt <sub>3</sub> H <sub>7</sub> ] <sup>+</sup> | 50.7 | 8.5  | -0.39 | 0.60  |
| [Pt <sub>3</sub> H <sub>7</sub> ]              | 7.7  | 7.4  | -1.20 | -0.39 |

---

**Table S12.** Summary of the Gibbs free energies for the chemical species used to estimate the individual hydricity values.

| Compound                                           | Gibbs energy in vacuo<br>(kcal/mol) | Gibbs energy in C-PCM<br>(kcal/mol) |
|----------------------------------------------------|-------------------------------------|-------------------------------------|
| [Pt(OH <sub>2</sub> ) <sub>2</sub> H] <sup>+</sup> | -170973.510                         | -171046.240                         |
| [Pt(OH <sub>2</sub> ) <sub>2</sub> ]               | -170754.857                         | -170765.154                         |
| [Pt(OH <sub>2</sub> ) <sub>2</sub> ] <sup>+</sup>  | -170587.600                         | -170656.065                         |
| [Pt(OH <sub>2</sub> ) <sub>2</sub> ] <sup>2+</sup> | -170239.658                         | -170524.937                         |
| [Pt(OH <sub>2</sub> )H]                            | -123181.086                         | -123200.390                         |
| [Pt(OH <sub>2</sub> )] <sup>-</sup>                | -122843.807                         | -122883.420                         |
| [Pt(OH <sub>2</sub> )]                             | -122801.102                         | -122812.465                         |
| [Pt(OH <sub>2</sub> )] <sup>+</sup>                | -122615.492                         | -122714.770                         |
| [PtH <sub>2</sub> ] <sup>+</sup>                   | -75410.179                          | -75534.732                          |
| [PtH]                                              | -75237.141                          | -75255.396                          |
| [PtH] <sup>+</sup>                                 | -75024.790                          | -75150.649                          |
| [PtH] <sup>2+</sup>                                | -74585.337                          | -75007.221                          |
| [PtH <sub>2</sub> ]                                | -75629.617                          | -75650.249                          |
| [PtH] <sup>-</sup>                                 | -75286.293                          | -75341.563                          |
| [PtH <sub>3</sub> ] <sup>+</sup>                   | -75802.514                          | -75916.866                          |
| [PtH <sub>2</sub> ] <sup>2+</sup>                  | -74975.394                          | -75365.620                          |
| [Pt <sub>2</sub> H] <sup>+</sup>                   | -149942.366                         | -150073.205                         |
| [Pt <sub>2</sub> ]                                 | -149762.519                         | -149782.261                         |
| [Pt <sub>2</sub> ] <sup>+</sup>                    | -149553.966                         | -149663.400                         |
| [Pt <sub>2</sub> ] <sup>2+</sup>                   | -149204.476                         | -149563.257                         |
| [Pt <sub>2</sub> H]                                | -150144.902                         | -150168.954                         |
| [Pt <sub>2</sub> ] <sup>-</sup>                    | -149816.087                         | -149853.282                         |
| [Pt <sub>2</sub> H <sub>2</sub> ] <sup>+</sup>     | -150328.911                         | -150455.760                         |
| [Pt <sub>2</sub> H] <sup>2+</sup>                  | -149587.959                         | -149934.857                         |
| [Pt <sub>2</sub> H <sub>2</sub> ]                  | -150527.212                         | -150556.918                         |
| [Pt <sub>2</sub> H] <sup>-</sup>                   | -150195.124                         | -150245.427                         |
| [Pt <sub>2</sub> H <sub>3</sub> ] <sup>+</sup>     | -150716.638                         | -150835.346                         |
| [Pt <sub>2</sub> H <sub>2</sub> ] <sup>2+</sup>    | -149967.838                         | -150312.186                         |
| [Pt <sub>2</sub> H <sub>3</sub> ]                  | -150893.581                         | -150923.370                         |
| [Pt <sub>2</sub> H <sub>2</sub> ] <sup>-</sup>     | -150576.038                         | -150627.196                         |
| [Pt <sub>2</sub> H <sub>4</sub> ] <sup>+</sup>     | -151086.591                         | -151207.840                         |
| [Pt <sub>2</sub> H <sub>3</sub> ] <sup>2+</sup>    | -150369.160                         | -150714.444                         |
| [Pt <sub>2</sub> H <sub>4</sub> ]                  | -151275.407                         | -151306.299                         |
| [Pt <sub>2</sub> H <sub>3</sub> ] <sup>-</sup>     | -150957.567                         | -151012.002                         |
| [Pt <sub>2</sub> H <sub>5</sub> ] <sup>+</sup>     | -151465.872                         | -151577.454                         |
| [Pt <sub>2</sub> H <sub>4</sub> ] <sup>2+</sup>    | -150759.990                         | -151091.527                         |
| [Pt <sub>3</sub> H] <sup>+</sup>                   | -224876.000                         | -225001.327                         |
| [Pt <sub>3</sub> ]                                 | -224682.823                         | -224709.822                         |
| [Pt <sub>3</sub> ] <sup>+</sup>                    | -224492.047                         | -224618.401                         |
| [Pt <sub>3</sub> ] <sup>2+</sup>                   | -224139.876                         | -224482.016                         |
| [Pt <sub>3</sub> H]                                | -225060.524                         | -225087.739                         |
| [Pt <sub>3</sub> ] <sup>-</sup>                    | -224737.885                         | -224777.113                         |
| [Pt <sub>3</sub> H <sub>2</sub> ] <sup>+</sup>     | -225260.125                         | -225384.096                         |
| [Pt <sub>3</sub> H] <sup>2+</sup>                  | -224551.458                         | -224877.633                         |
| [Pt <sub>3</sub> H <sub>2</sub> ]                  | -225428.924                         | -225464.348                         |



|                                                 |             |             |
|-------------------------------------------------|-------------|-------------|
| [Pt <sub>3</sub> H] <sup>-</sup>                | -225108.751 | -225152.964 |
| [Pt <sub>3</sub> H <sub>3</sub> ] <sup>+</sup>  | -225619.795 | -225747.751 |
| [Pt <sub>3</sub> H <sub>2</sub> ] <sup>2+</sup> | -224861.645 | -225530.164 |
| [Pt <sub>3</sub> H <sub>3</sub> ]               | -225805.415 | -225846.068 |
| [Pt <sub>3</sub> H <sub>2</sub> ] <sup>-</sup>  | -225490.491 | -225543.113 |
| [Pt <sub>3</sub> H <sub>4</sub> ] <sup>+</sup>  | -225999.246 | -226121.292 |
| [Pt <sub>3</sub> H <sub>3</sub> ] <sup>2+</sup> | -225326.780 | -225659.867 |
| [Pt <sub>3</sub> H <sub>4</sub> ]               | -226181.147 | -226227.522 |
| [Pt <sub>3</sub> H <sub>3</sub> ] <sup>-</sup>  | -225867.445 | -225929.139 |
| [Pt <sub>3</sub> H <sub>5</sub> ] <sup>+</sup>  | -226376.498 | -226493.014 |
| [Pt <sub>3</sub> H <sub>4</sub> ] <sup>2+</sup> | -225701.952 | -226025.478 |
| [Pt <sub>3</sub> H <sub>5</sub> ]               | -226555.640 | -226597.220 |
| [Pt <sub>3</sub> H <sub>4</sub> ] <sup>-</sup>  | -226239.284 | -226302.034 |
| [Pt <sub>3</sub> H <sub>6</sub> ] <sup>+</sup>  | -226744.606 | -226873.349 |
| [Pt <sub>3</sub> H <sub>5</sub> ] <sup>2+</sup> | -226080.498 | -226390.568 |
| [Pt <sub>3</sub> H <sub>6</sub> ]               | -226929.271 | -226970.314 |
| [Pt <sub>3</sub> H <sub>5</sub> ] <sup>-</sup>  | -226688.864 | -226625.964 |
| [Pt <sub>3</sub> H <sub>7</sub> ] <sup>+</sup>  | -227121.747 | -227246.550 |
| [Pt <sub>3</sub> H <sub>6</sub> ] <sup>2+</sup> | -226448.308 | -226753.582 |
| [Pt <sub>3</sub> H <sub>7</sub> ]               | -227294.607 | -227323.202 |
| [Pt <sub>3</sub> H <sub>6</sub> ] <sup>-</sup>  | -226985.400 | -227048.533 |

---

**Table S13.** Summary of the bond lengths in  $^1[\text{Pt}_3\text{H}_5]^+$  (i.e.,  $^1[\text{Pt}_3(\text{H}_{\text{ontop}})_2(\mu\text{-H}_{\text{bridge}})(\text{H}_2)]^+$ ), optimized at the M06 level of DFT using SDD(Pt) and 6-31+G\*\*(H) basis sets in vacuo.

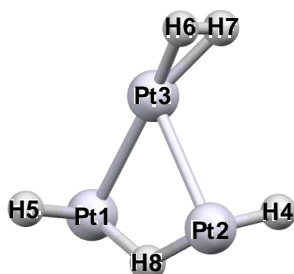

| Bond length (Å) |       |
|-----------------|-------|
| Pt1-Pt3         | 2.641 |
| Pt2-Pt3         | 2.592 |
| Pt1-H5          | 1.525 |
| Pt1-H8          | 1.657 |
| Pt2-H4          | 1.519 |
| Pt2-H8          | 1.783 |
| Pt3-H6          | 1.733 |
| Pt3-H7          | 1.731 |
| H6-H7           | 0.867 |

**Scheme S2.** Free energy changes relevant to the catalytic processes of Pt nanoclusters under the applied potential of 0.0 V vs. NHE at pH 0.<sup>S10,S11</sup>

Electron transfer process:

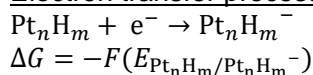

Proton transfer process:

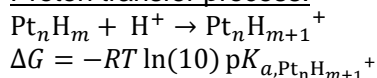

H<sub>2</sub> elimination process:

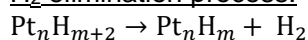

a) PT-PT-ET-ET path

$$\Delta G_{\text{H}_2} = RT \ln(10)(\text{p}K_{a,\text{Pt}_n\text{H}_{m+1}^+} + \text{p}K_{a,\text{Pt}_n\text{H}_{m+2}^{2+}}) + F(E_{\text{Pt}_n\text{H}_{m+2}^{2+}/\text{Pt}_n\text{H}_{m+2}^+} + E_{\text{Pt}_n\text{H}_{m+2}^+/\text{Pt}_n\text{H}_{m+2}})$$

b) PT-ET-PT-ET path

$$\Delta G_{\text{H}_2} = RT \ln(10)(\text{p}K_{a,\text{Pt}_n\text{H}_{m+1}^+} + \text{p}K_{a,\text{Pt}_n\text{H}_{m+2}^+}) + F(E_{\text{Pt}_n\text{H}_{m+1}^+/\text{Pt}_n\text{H}_{m+1}} + E_{\text{Pt}_n\text{H}_{m+2}^+/\text{Pt}_n\text{H}_{m+2}})$$

c) PT-ET-ET-PT path

$$\Delta G_{\text{H}_2} = RT \ln(10)(\text{p}K_{a,\text{Pt}_n\text{H}_{m+1}^+} + \text{p}K_{a,\text{Pt}_n\text{H}_{m+2}}) + F(E_{\text{Pt}_n\text{H}_{m+1}^+/\text{Pt}_n\text{H}_{m+1}} + E_{\text{Pt}_n\text{H}_{m+1}/\text{Pt}_n\text{H}_{m+1}^-})$$

d) ET-PT-PT-ET path

$$\Delta G_{\text{H}_2} = RT \ln(10)(\text{p}K_{a,\text{Pt}_n\text{H}_{m+1}} + \text{p}K_{a,\text{Pt}_n\text{H}_{m+2}^+}) + F(E_{\text{Pt}_n\text{H}_m/\text{Pt}_n\text{H}_m^-} + E_{\text{Pt}_n\text{H}_{m+2}^+/\text{Pt}_n\text{H}_{m+2}})$$

e) ET-PT-ET-PT path

$$\Delta G_{\text{H}_2} = RT \ln(10)(\text{p}K_{a,\text{Pt}_n\text{H}_{m+1}} + \text{p}K_{a,\text{Pt}_n\text{H}_{m+2}}) + F(E_{\text{Pt}_n\text{H}_m/\text{Pt}_n\text{H}_m^-} + E_{\text{Pt}_n\text{H}_{m+1}/\text{Pt}_n\text{H}_{m+1}^-})$$

f) ET-ET-PT-PT path

$$\Delta G_{\text{H}_2} = RT \ln(10)(\text{p}K_{a,\text{Pt}_n\text{H}_{m+1}^-} + \text{p}K_{a,\text{Pt}_n\text{H}_{m+2}}) + F(E_{\text{Pt}_n\text{H}_m/\text{Pt}_n\text{H}_m^-} + E_{\text{Pt}_n\text{H}_m^-/\text{Pt}_n\text{H}_m^{2-}})$$

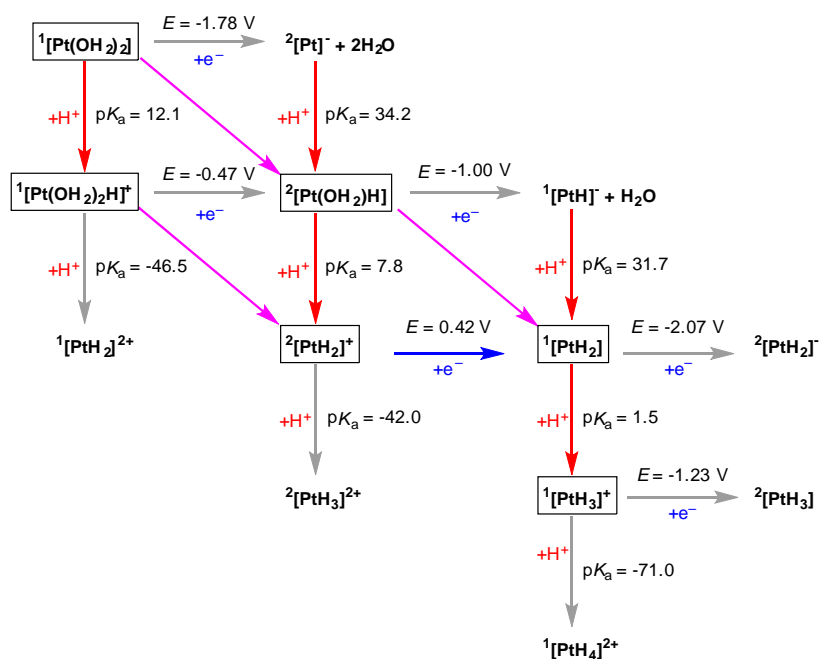

**Fig. S9** Square schemes developed for the Pt<sub>1</sub> system, where each potential is given in V vs. NHE. The species highlighted by rectangles are possible intermediates during the catalysis. Arrows in red, blue and pink colors represent the exergonic pathways, while those in gray color represent the endergonic pathways under the applied potential of 0.0 V vs NHE at pH 0.

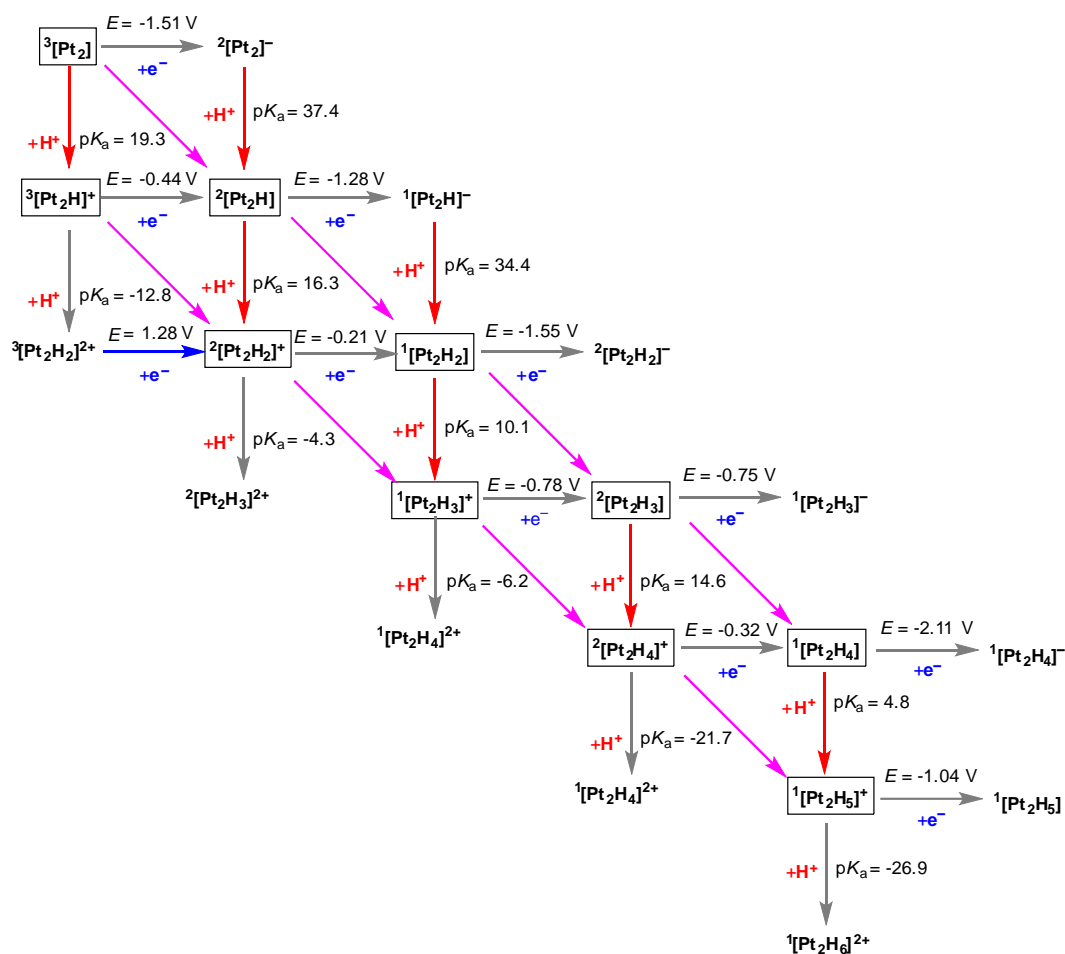

**Fig. S10** Square schemes developed for the Pt<sub>2</sub> system, where each potential is given in V vs. NHE. The species highlighted by rectangles are possible intermediates during the catalysis. Arrows in red, blue and pink colors represent the exergonic pathways, while those in gray color represent the endergonic pathways under the applied potential of 0.0 V vs NHE at pH 0.

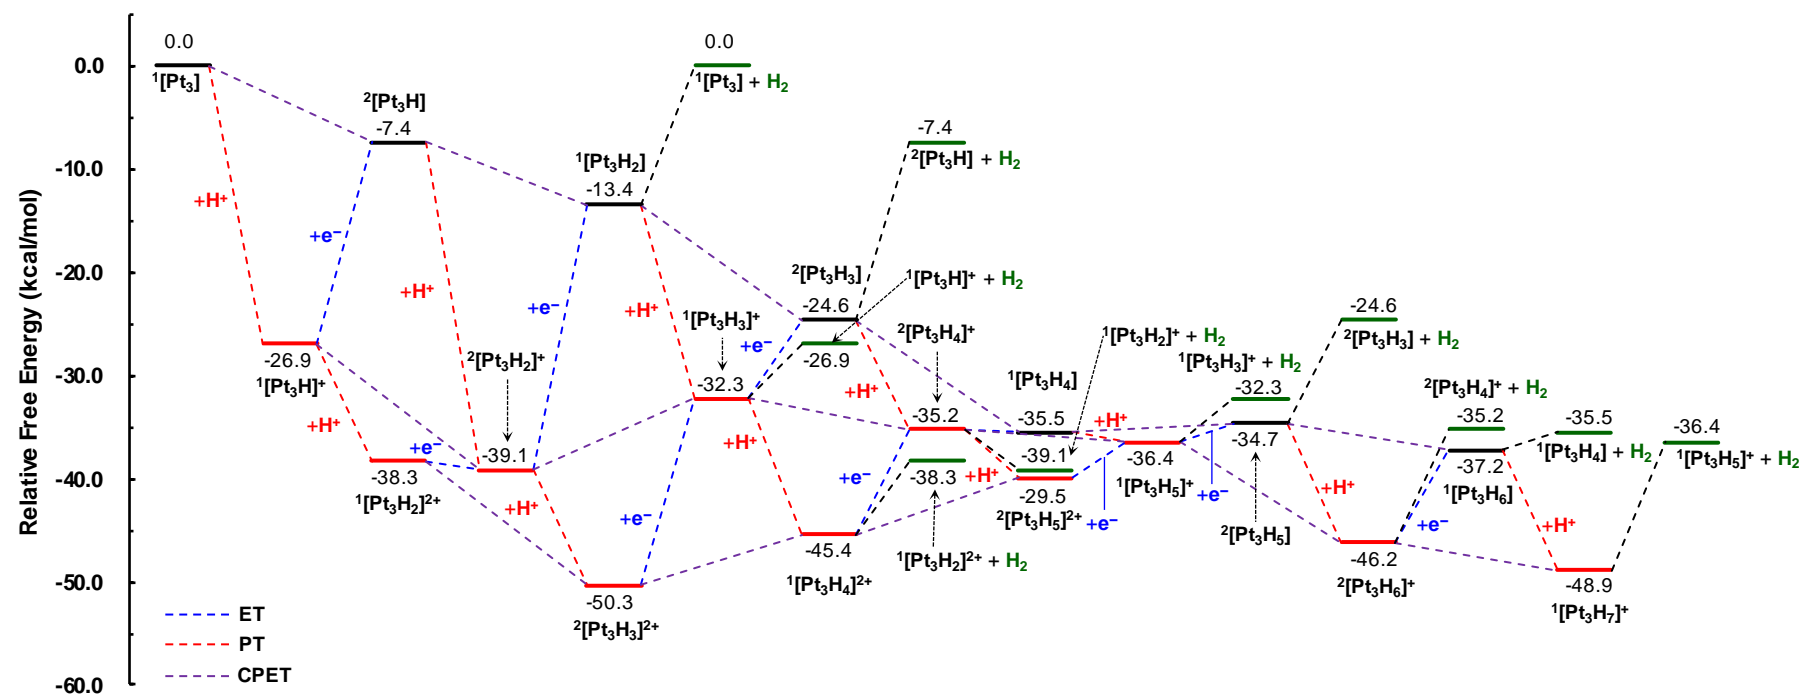

Fig. S11 Energy diagram for the reaction steps computed for the Pt<sub>3</sub> system when the electrocatalytic HER is driven by 0.0 V vs. NHE at pH 0.

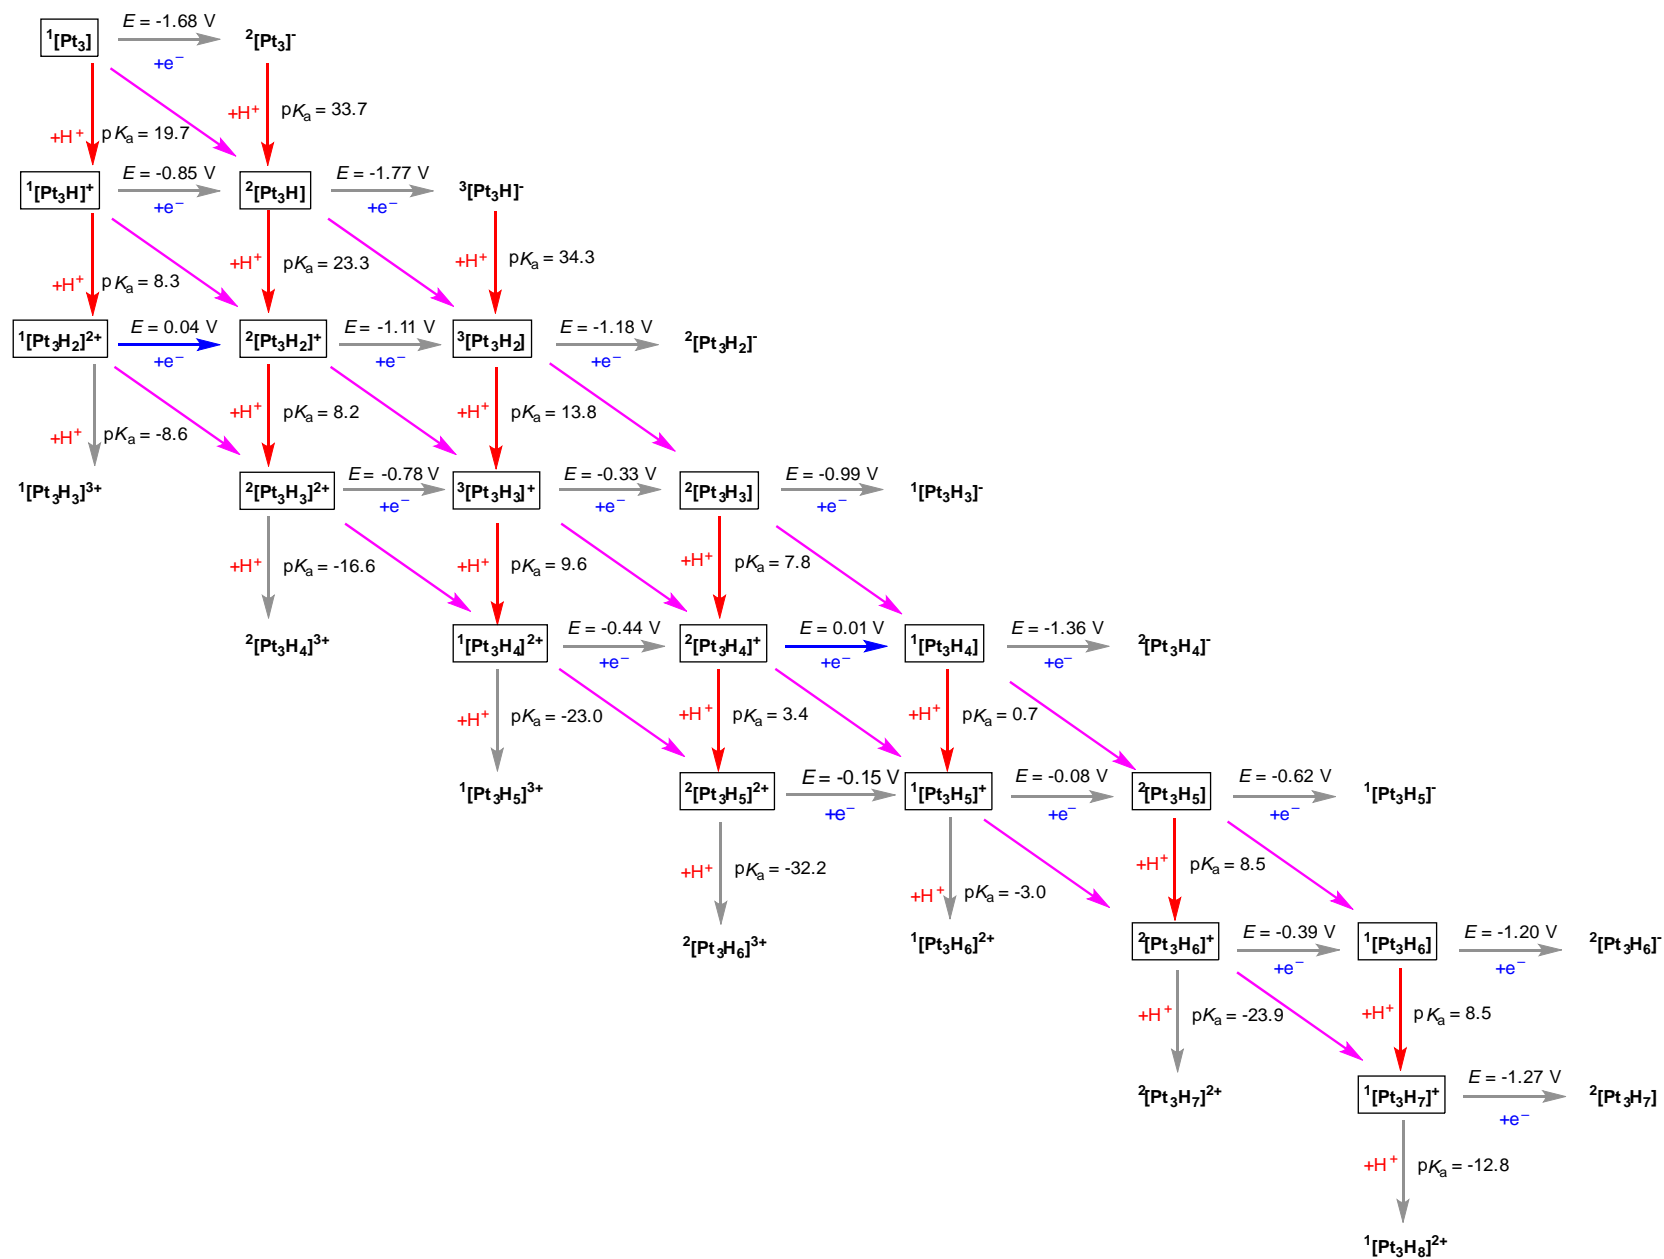

**Fig. S12** Square schemes developed for the  $\text{Pt}_3$  system, where each potential is given in V vs. NHE. The species highlighted by rectangles are possible intermediates during the catalysis. Arrows in red, blue and pink colors represent the exergonic pathways, while those in gray color represent the endergonic pathways under the applied potential of 0.0 V vs NHE at pH 0.

**Table S14.** Summary of the Gibbs free energies computed for the species appearing in the unfeasible reaction paths.

| Compound                         | Gibbs energy in vacuo<br>(kcal/mol) | Gibbs energy in C-PCM<br>(kcal/mol) |
|----------------------------------|-------------------------------------|-------------------------------------|
| $^1[\text{PtH}_2]^{2+}$          | -74975.394                          | -75365.620                          |
| $^2[\text{PtH}_2]^-$             | -75651.485                          | -75708.457                          |
| $^2[\text{PtH}_3]^{2+}$          | -75375.290                          | -75742.065                          |
| $^2[\text{PtH}_3]$               | -75975.928                          | -75994.609                          |
| $^1[\text{PtH}_4]^{2+}$          | -75745.075                          | -76084.619                          |
| $^3[\text{Pt}_2\text{H}_2]^{2+}$ | -149967.964                         | -150320.427                         |
| $^2[\text{Pt}_2\text{H}_2]^-$    | -150329.037                         | -150455.886                         |
| $^2[\text{Pt}_2\text{H}_3]^{2+}$ | -150369.286                         | -150714.571                         |
| $^1[\text{Pt}_2\text{H}_3]^-$    | -150957.694                         | -151012.129                         |
| $^1[\text{Pt}_2\text{H}_4]^{2+}$ | -150760.116                         | -151091.653                         |
| $^1[\text{Pt}_2\text{H}_4]^-$    | -151308.062                         | -151358.567                         |
| $^2[\text{Pt}_2\text{H}_5]^{2+}$ | -151129.456                         | -151442.943                         |
| $^2[\text{Pt}_2\text{H}_5]$      | -151637.033                         | -151659.556                         |
| $^1[\text{Pt}_2\text{H}_6]^{2+}$ | -151504.637                         | -151805.538                         |
| $^2[\text{Pt}_3\text{H}_2]^-$    | -225490.680                         | -225543.302                         |
| $^1[\text{Pt}_3\text{H}_3]^{3+}$ | -224861.834                         | -225530.353                         |
| $^1[\text{Pt}_3\text{H}_3]^-$    | -225867.634                         | -225929.328                         |
| $^2[\text{Pt}_3\text{H}_4]^{3+}$ | -225250.483                         | -225902.022                         |
| $^2[\text{Pt}_3\text{H}_4]^-$    | -226239.474                         | -226302.223                         |
| $^1[\text{Pt}_3\text{H}_5]^{3+}$ | -225632.331                         | -226258.897                         |
| $^1[\text{Pt}_3\text{H}_5]^-$    | -226626.154                         | -226689.054                         |
| $^2[\text{Pt}_3\text{H}_6]^{3+}$ | -226007.044                         | -226611.307                         |
| $^1[\text{Pt}_3\text{H}_6]^{2+}$ | -226448.498                         | -226753.773                         |
| $^2[\text{Pt}_3\text{H}_6]^-$    | -226985.590                         | -227048.724                         |
| $^2[\text{Pt}_3\text{H}_7]^{2+}$ | -226817.775                         | -227105.519                         |
| $^2[\text{Pt}_3\text{H}_7]$      | -227294.798                         | -227323.393                         |
| $^1[\text{Pt}_3\text{H}_8]^{2+}$ | -227203.227                         | -227493.944                         |



(A) Tetraplatinum system

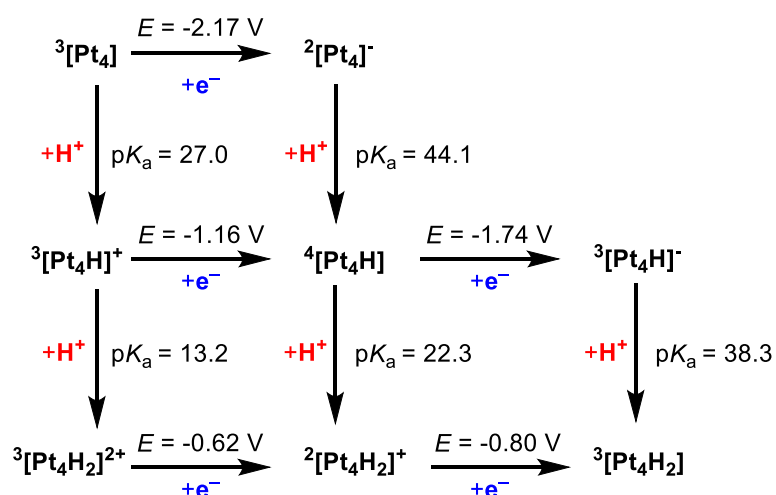

(B) Pentaplatinum system

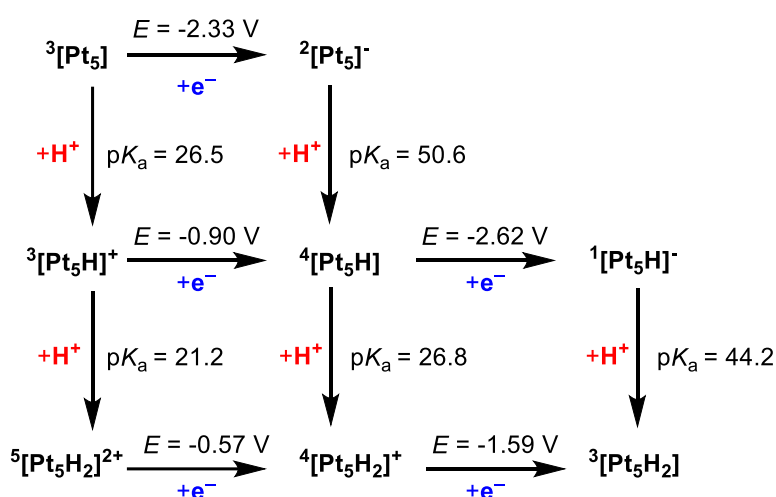

(C) Undecaplatinum system

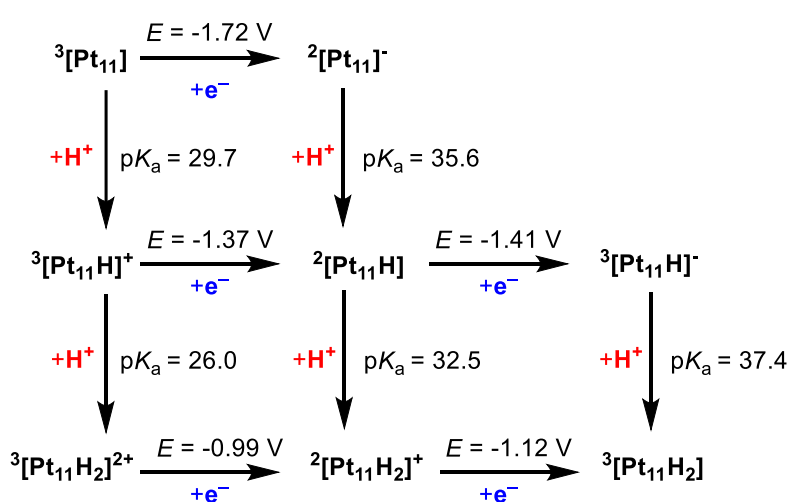

**Fig. S13** Selected square schemes for the Pt<sub>4</sub> (A), Pt<sub>5</sub> (B), and Pt<sub>11</sub> (C) systems, where each potential is given in V vs. NHE.

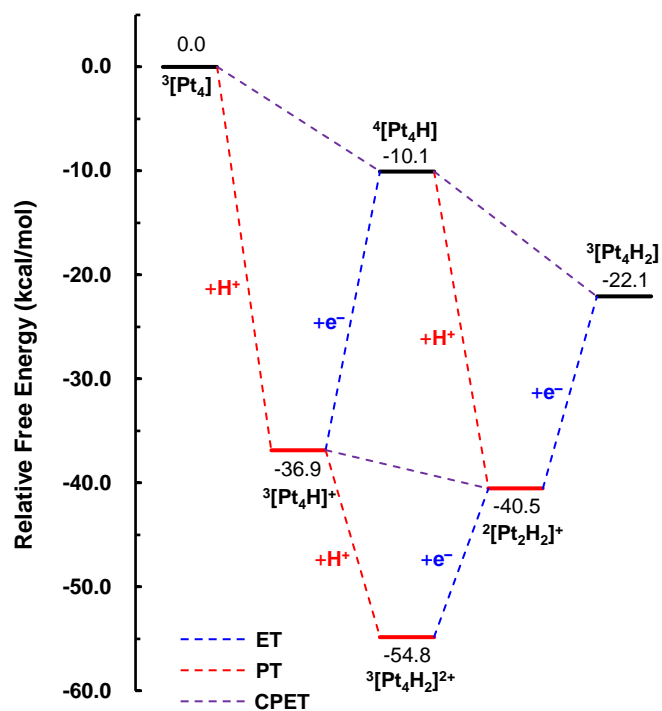

**Fig. S14** Energy diagram for the reaction steps computed for the Pt<sub>4</sub> system when the electrocatalytic HER is driven by 0.0 V vs. NHE at pH 0.

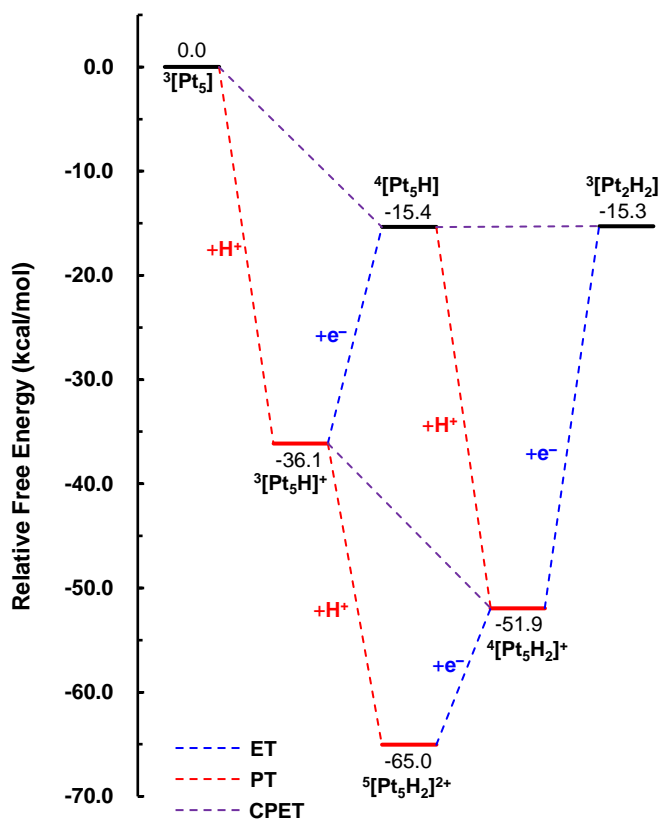

**Fig. S15** Energy diagram for the reaction steps computed for the Pt<sub>5</sub> system when the electrocatalytic HER is driven by 0.0 V vs. NHE at pH 0.

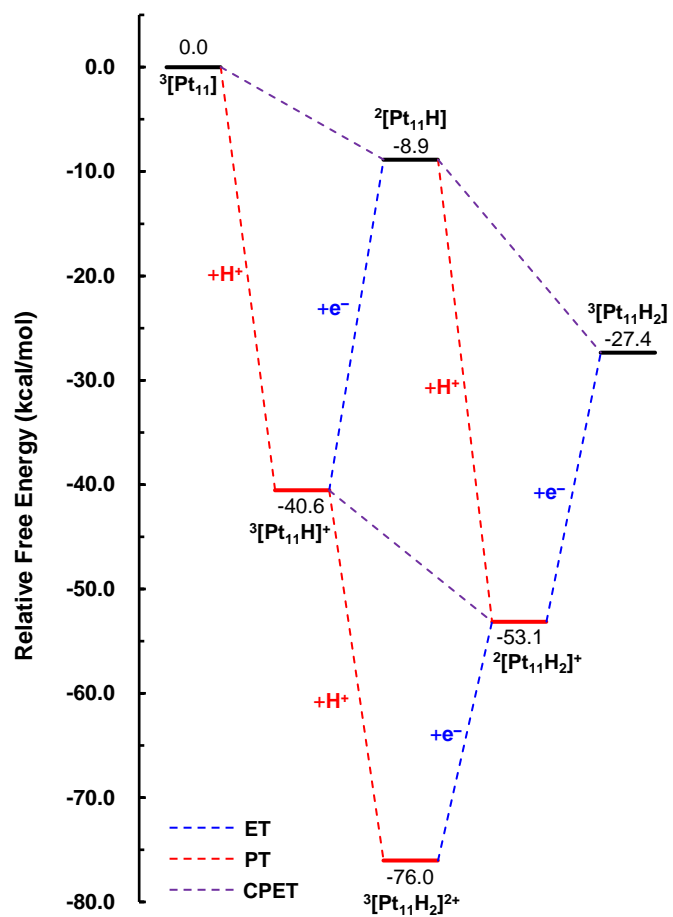

**Fig. S16** Energy diagram for the reaction steps computed for the Pt<sub>11</sub> system when the electrocatalytic HER is driven by 0.0 V vs. NHE at pH 0.

**Table S15.**

(A) Summary for the DFT calculation of Pt (i.e., single Pt(0) atom) in its singlet state. Computed at the M06 level of DFT using SDD(Pt) basis set in vacuo.<sup>a</sup>

<sup>a</sup>Part of the Gaussian output file:

|                                              |                             |
|----------------------------------------------|-----------------------------|
| Thermal correction to Energy=                | 0.001416 (Hartree/Particle) |
| Thermal correction to Enthalpy=              | 0.002360                    |
| Thermal correction to Gibbs Free Energy=     | -0.017456                   |
| Sum of electronic and zero-point Energies=   | -119.271079                 |
| Sum of electronic and thermal Energies=      | -119.269662                 |
| Sum of electronic and thermal Enthalpies=    | -119.268718                 |
| Sum of electronic and thermal Free Energies= | -119.288535                 |

(B) Summary for the DFT calculation of Pt (singlet) with solvation in water taken into consideration (C-PCM), at the M06 level of DFT with SDD(Pt) basis set.<sup>a</sup>

<sup>a</sup>Part of the Gaussian output file:

|                                              |                             |
|----------------------------------------------|-----------------------------|
| Thermal correction to Energy=                | 0.001416 (Hartree/Particle) |
| Thermal correction to Enthalpy=              | 0.002360                    |
| Thermal correction to Gibbs Free Energy=     | -0.017456                   |
| Sum of electronic and zero-point Energies=   | -119.277578                 |
| Sum of electronic and thermal Energies=      | -119.276162                 |
| Sum of electronic and thermal Enthalpies=    | -119.275218                 |
| Sum of electronic and thermal Free Energies= | -119.295035                 |

**Table S16.**

(A) Summary for the DFT calculation of Pt (i.e., single Pt(0) atom) in its triplet state. Computed at the M06 level of DFT using SDD(Pt) basis set in vacuo.<sup>a</sup>

<sup>a</sup>Part of the Gaussian output file:

Annihilation of the first spin contaminant:  
S\*\*2 before annihilation 2.0027, after 2.0000

|                                              |                             |
|----------------------------------------------|-----------------------------|
| Thermal correction to Energy=                | 0.001416 (Hartree/Particle) |
| Thermal correction to Enthalpy=              | 0.002360                    |
| Thermal correction to Gibbs Free Energy=     | -0.018494                   |
| Sum of electronic and zero-point Energies=   | -119.267154                 |
| Sum of electronic and thermal Energies=      | -119.265738                 |
| Sum of electronic and thermal Enthalpies=    | -119.264793                 |
| Sum of electronic and thermal Free Energies= | -119.285648                 |

(B) Summary for the DFT calculation of Pt (triplet) with solvation in water taken into consideration (C-PCM), at the M06 level of DFT with SDD(Pt) basis set.<sup>a</sup>

<sup>a</sup>Part of the Gaussian output file:

Annihilation of the first spin contaminant:  
S\*\*2 before annihilation 2.0032, after 2.0000

|                                 |                             |
|---------------------------------|-----------------------------|
| Thermal correction to Energy=   | 0.001416 (Hartree/Particle) |
| Thermal correction to Enthalpy= | 0.002360                    |

|                                              |             |
|----------------------------------------------|-------------|
| Thermal correction to Gibbs Free Energy=     | -0.018494   |
| Sum of electronic and zero-point Energies=   | -119.278938 |
| Sum of electronic and thermal Energies=      | -119.277522 |
| Sum of electronic and thermal Enthalpies=    | -119.276577 |
| Sum of electronic and thermal Free Energies= | -119.297432 |

**Table S17.**

(A) Geometry optimized for [Pt(OH<sub>2</sub>)] (singlet) computed at the M06 level of DFT using SDD(Pt) and 6-31+G\*\*(H,O) basis sets in vacuo.<sup>a</sup>

| Atom Label | X in angstrom | Y in angstrom | Z in angstrom | Mulliken Charge |
|------------|---------------|---------------|---------------|-----------------|
| Pt1        | 0.251720      | -0.000006     | 0.001290      | -0.073240       |
| O2         | -1.907902     | -0.000044     | -0.110431     | -0.780554       |
| H3         | -2.186304     | -0.776891     | 0.391646      | 0.426924        |
| H4         | -2.184669     | 0.777722      | 0.391179      | 0.426869        |

<sup>a</sup>Part of the Gaussian output file:

SCF Done: E(RM06) = -195.693879520 A.U. after 10 cycles

| Item          | Value    | Threshold | Converged? |
|---------------|----------|-----------|------------|
| Maximum Force | 0.000068 | 0.000450  | YES        |
| RMS Force     | 0.000038 | 0.000300  | YES        |

|                | 1        | 2        | 3        |
|----------------|----------|----------|----------|
|                | A        | A        | A        |
| Frequencies -- | 325.7599 | 517.5624 | 560.7030 |
| Red. masses -- | 5.6421   | 1.1967   | 1.0451   |
| Frc consts --  | 0.3528   | 0.1889   | 0.1936   |
| IR Inten --    | 0.2142   | 293.1672 | 0.6567   |

Zero-point correction= 0.024457 (Hartree/Particle)  
 Thermal correction to Energy= 0.028076  
 Thermal correction to Enthalpy= 0.029020  
 Thermal correction to Gibbs Free Energy= -0.001969  
 Sum of electronic and zero-point Energies= -195.669423  
 Sum of electronic and thermal Energies= -195.665803  
 Sum of electronic and thermal Enthalpies= -195.664859  
 Sum of electronic and thermal Free Energies= -195.695849

(B) Summary for the DFT calculation of [Pt(OH<sub>2</sub>)] (singlet) with solvation in water taken into consideration (C-PCM), at the M06 level of DFT with SDD(Pt) and 6-31+G\*\*(H,O) basis sets. Computed by the single-point calculation for its optimized structure in vacuo.<sup>a</sup>

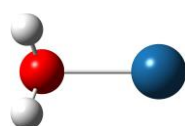

| Atom Label | X in angstrom | Y in angstrom | Z in angstrom | Mulliken Charge |
|------------|---------------|---------------|---------------|-----------------|
| Pt1        | 0.251720      | -0.000006     | 0.001290      | -0.097531       |
| O2         | -1.907902     | -0.000044     | -0.110431     | -0.794640       |
| H3         | -2.186304     | -0.776891     | 0.391646      | 0.446130        |
| H4         | -2.184669     | 0.777722      | 0.391179      | 0.446040        |

<sup>a</sup>Part of the Gaussian output file:

|                                              |                             |
|----------------------------------------------|-----------------------------|
| Zero-point correction=                       | 0.024227 (Hartree/Particle) |
| Thermal correction to Energy=                | 0.027895                    |
| Thermal correction to Enthalpy=              | 0.028839                    |
| Thermal correction to Gibbs Free Energy=     | -0.002227                   |
| Sum of electronic and zero-point Energies=   | -195.687502                 |
| Sum of electronic and thermal Energies=      | -195.683834                 |
| Sum of electronic and thermal Enthalpies=    | -195.682890                 |
| Sum of electronic and thermal Free Energies= | -195.713956                 |

**Table S18.**

(A) Geometry optimized for [Pt(OH<sub>2</sub>)] (triplet) computed at the M06 level of DFT using SDD(Pt) and 6-31+G\*\*(H,O) basis sets in vacuo.<sup>a</sup>

| Atom Label | X in angstrom | Y in angstrom | Z in angstrom | Mulliken Charge | Spin Density |
|------------|---------------|---------------|---------------|-----------------|--------------|
| Pt1        | 0.292564      | -0.000006     | 0.001228      | -0.100391       | 1.989652     |
| O2         | -2.217419     | -0.000065     | -0.105082     | -0.695626       | -0.000875    |
| H3         | -2.541223     | -0.772480     | 0.372683      | 0.398026        | 0.005619     |
| H4         | -2.539411     | 0.773436      | 0.372152      | 0.397991        | 0.005604     |

<sup>a</sup>Part of the Gaussian output file:

SCF Done: E(UM06) = -195.675879145 A.U. after 17 cycles

Annihilation of the first spin contaminant:

S\*\*2 before annihilation 2.0029, after 2.0000

| Item          | Value    | Threshold | Converged? |
|---------------|----------|-----------|------------|
| Maximum Force | 0.000020 | 0.000450  | YES        |
| RMS Force     | 0.000011 | 0.000300  | YES        |

|                | 1        | 2        | 3        |
|----------------|----------|----------|----------|
|                | A        | A        | A        |
| Frequencies -- | 188.5257 | 342.1375 | 386.0530 |
| Red. masses -- | 6.2631   | 1.1705   | 1.0440   |
| Frc consts --  | 0.1312   | 0.0807   | 0.0917   |
| IR Inten --    | 10.1224  | 275.5564 | 0.5286   |

Zero-point correction= 0.023526 (Hartree/Particle)  
 Thermal correction to Energy= 0.027634  
 Thermal correction to Enthalpy= 0.028578  
 Thermal correction to Gibbs Free Energy= -0.004683  
 Sum of electronic and zero-point Energies= -195.652353  
 Sum of electronic and thermal Energies= -195.648245  
 Sum of electronic and thermal Enthalpies= -195.647301  
 Sum of electronic and thermal Free Energies= -195.680562

(B) Summary for the DFT calculation of [Pt(OH<sub>2</sub>)] (triplet) with solvation in water taken into consideration (C-PCM), at the M06 level of DFT with SDD(Pt) and 6-31+G\*\*(H,O) basis sets. Computed by the single-point calculation for its optimized structure in vacuo.<sup>a</sup>

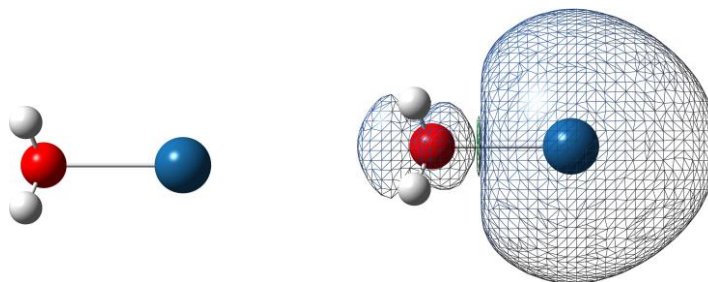

Spin density distribution



| Atom Label | X in angstrom | Y in angstrom | Z in angstrom | Mulliken Charge | Spin Density |
|------------|---------------|---------------|---------------|-----------------|--------------|
| Pt1        | 0.292564      | -0.000006     | 0.001228      | -0.085232       | 1.994503     |
| O2         | -2.217419     | -0.000065     | -0.105082     | -0.743260       | -0.006898    |
| H3         | -2.541224     | -0.772480     | 0.372683      | 0.414264        | 0.006206     |
| H4         | -2.539411     | 0.773436      | 0.372152      | 0.414228        | 0.006189     |

<sup>a</sup>Part of the Gaussian output file:

Zero-point correction= 0.022380 (Hartree/Particle)  
 Thermal correction to Energy= 0.026268  
 Thermal correction to Enthalpy= 0.027212  
 Thermal correction to Gibbs Free Energy= -0.005778  
 Sum of electronic and zero-point Energies= -195.665770  
 Sum of electronic and thermal Energies= -195.661883  
 Sum of electronic and thermal Enthalpies= -195.660939  
 Sum of electronic and thermal Free Energies= -195.693928

**Table S19.**

(A) Geometry optimized for  $[\text{Pt}(\text{OH}_2)_2]$  (singlet) computed at the M06 level of DFT using SDD(Pt) and 6-31+G\*\*(H,O) basis sets in vacuo.<sup>a</sup>

| Atom Label | X in angstrom | Y in angstrom | Z in angstrom | Mulliken Charge |
|------------|---------------|---------------|---------------|-----------------|
| Pt1        | 0.000000      | 0.012942      | 0.000000      | -0.363913       |
| O2         | 2.120403      | 0.021599      | -0.080355     | -0.663227       |
| O3         | -2.120400     | 0.021573      | 0.080374      | -0.663234       |
| H4         | 2.400755      | 0.219285      | 0.823754      | 0.422759        |
| H5         | 2.363130      | -0.896794     | -0.260075     | 0.422429        |
| H6         | -2.400785     | 0.219539      | -0.823663     | 0.422758        |
| H7         | -2.363140     | -0.896867     | 0.259828      | 0.422428        |

<sup>a</sup>Part of the Gaussian output file:

SCF Done: E(RM06) = -272.135881414 A.U. after 8 cycles

| Item          | Value    | Threshold | Converged? |
|---------------|----------|-----------|------------|
| Maximum Force | 0.000001 | 0.000450  | YES        |
| RMS Force     | 0.000000 | 0.000300  | YES        |

|                | 1        | 2        | 3        |
|----------------|----------|----------|----------|
|                | A        | A        | A        |
| Frequencies -- | 129.4163 | 149.9240 | 152.4530 |
| Red. masses -- | 1.0659   | 4.2381   | 5.0360   |
| Frc consts --  | 0.0105   | 0.0561   | 0.0690   |
| IR Inten --    | 67.1261  | 1.4973   | 18.0452  |

Zero-point correction= 0.050621 (Hartree/Particle)  
 Thermal correction to Energy= 0.056694  
 Thermal correction to Enthalpy= 0.057638  
 Thermal correction to Gibbs Free Energy= 0.020923  
 Sum of electronic and zero-point Energies= -272.085260  
 Sum of electronic and thermal Energies= -272.079187  
 Sum of electronic and thermal Enthalpies= -272.078243  
 Sum of electronic and thermal Free Energies= -272.114958

(B) Summary for the DFT calculation of  $[\text{Pt}(\text{OH}_2)_2]$  (singlet) with solvation in water taken into consideration (C-PCM), at the M06 level of DFT with SDD(Pt) and 6-31+G\*\*(H,O) basis sets. Computed by the single-point calculation for its optimized structure in vacuo.<sup>a</sup>

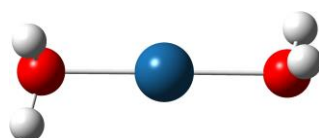

| Atom Label | X in angstrom | Y in angstrom | Z in angstrom | Mulliken Charge |
|------------|---------------|---------------|---------------|-----------------|
| Pt1        | 0.000000      | 0.012942      | 0.000000      | -0.375066       |
| O2         | 2.120403      | 0.021599      | -0.080355     | -0.702997       |
| O3         | -2.120400     | 0.021573      | 0.080374      | -0.703002       |

|    |           |           |           |          |
|----|-----------|-----------|-----------|----------|
| H4 | 2.400755  | 0.219285  | 0.823754  | 0.445232 |
| H5 | 2.363130  | -0.896794 | -0.260075 | 0.445301 |
| H6 | -2.400785 | 0.219539  | -0.823663 | 0.445232 |
| H7 | -2.363140 | -0.896867 | 0.259828  | 0.445300 |

---

<sup>a</sup>Part of the Gaussian output file:

|                                              |                             |
|----------------------------------------------|-----------------------------|
| Zero-point correction=                       | 0.049916 (Hartree/Particle) |
| Thermal correction to Energy=                | 0.055407                    |
| Thermal correction to Enthalpy=              | 0.056351                    |
| Thermal correction to Gibbs Free Energy=     | 0.020864                    |
| Sum of electronic and zero-point Energies=   | -272.102315                 |
| Sum of electronic and thermal Energies=      | -272.096824                 |
| Sum of electronic and thermal Enthalpies=    | -272.095880                 |
| Sum of electronic and thermal Free Energies= | -272.131367                 |

**Table S20.**

(A) Geometry optimized for [Pt(OH<sub>2</sub>)<sub>2</sub>] (triplet) computed at the M06 level of DFT using SDD(Pt) and 6-31+G\*\*(H,O) basis sets in vacuo.<sup>a</sup>

| Atom Label | X in angstrom | Y in angstrom | Z in angstrom | Mulliken Charge | Spin Density |
|------------|---------------|---------------|---------------|-----------------|--------------|
| Pt1        | 0.000076      | -0.006624     | 0.000089      | -0.246008       | 2.078949     |
| O2         | 2.680813      | -0.046405     | 0.083833      | -0.657211       | -0.052484    |
| O3         | -2.682389     | -0.049110     | -0.082614     | -0.657055       | -0.052042    |
| H4         | 2.912600      | -0.255447     | -0.827821     | 0.390591        | 0.006441     |
| H5         | 2.892766      | 0.885402      | 0.207693      | 0.389380        | 0.006404     |
| H6         | -2.909421     | -0.229144     | 0.836410      | 0.390766        | 0.006378     |
| H7         | -2.889265     | 0.879987      | -0.232944     | 0.389538        | 0.006353     |

<sup>a</sup>Part of the Gaussian output file:

SCF Done: E(UM06) = -272.080534520 A.U. after 16 cycles  
 Annihilation of the first spin contaminant:  
 S\*\*2 before annihilation 2.0029, after 2.0000

| Item          | Value    | Threshold | Converged? |
|---------------|----------|-----------|------------|
| Maximum Force | 0.000035 | 0.000450  | YES        |
| RMS Force     | 0.000018 | 0.000300  | YES        |

|                | 1       | 2       | 3       |
|----------------|---------|---------|---------|
|                | A       | A       | A       |
| Frequencies -- | 50.1781 | 56.2938 | 59.7880 |
| Red. masses -- | 5.9499  | 6.3359  | 1.0404  |
| Frc consts --  | 0.0088  | 0.0118  | 0.0022  |
| IR Inten --    | 3.9621  | 0.0964  | 73.1924 |

Zero-point correction= 0.046554 (Hartree/Particle)  
 Thermal correction to Energy= 0.054967  
 Thermal correction to Enthalpy= 0.055911  
 Thermal correction to Gibbs Free Energy= 0.011143  
 Sum of electronic and zero-point Energies= -272.033980  
 Sum of electronic and thermal Energies= -272.025568  
 Sum of electronic and thermal Enthalpies= -272.024624  
 Sum of electronic and thermal Free Energies= -272.069392

(B) Summary for the DFT calculation of [Pt(OH<sub>2</sub>)<sub>2</sub>] (triplet) with solvation in water taken into consideration (C-PCM), at the M06 level of DFT with SDD(Pt) and 6-31+G\*\*(H,O) basis sets. Computed by the single-point calculation for its optimized structure in vacuo.<sup>a</sup>

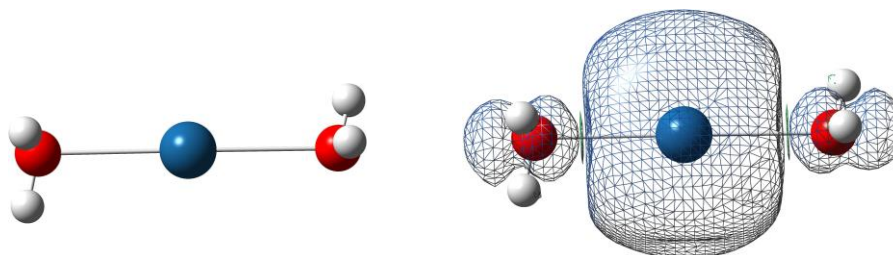

Spin density distribution

| Atom Label | X in angstrom | Y in angstrom | Z in angstrom | Mulliken Charge | Spin Density |
|------------|---------------|---------------|---------------|-----------------|--------------|
| Pt1        | -0.000076     | 0.006624      | 0.000089      | -0.239548       | 2.061002     |
| O2         | -2.680814     | 0.046405      | 0.083833      | -0.698015       | -0.041048    |
| O3         | 2.682389      | 0.049110      | -0.082614     | -0.698004       | -0.040627    |
| H4         | -2.912600     | 0.255447      | -0.827821     | 0.409008        | 0.005141     |
| H5         | -2.892767     | -0.885402     | 0.207693      | 0.408661        | 0.005259     |
| H6         | 2.909421      | 0.229144      | 0.836410      | 0.409118        | 0.005078     |
| H7         | 2.889265      | -0.879987     | -0.232944     | 0.408780        | 0.005196     |

<sup>a</sup>Part of the Gaussian output file:

```

Zero-point correction=          0.043898 (Hartree/Particle)
Thermal correction to Energy=    0.050452
Thermal correction to Enthalpy=   0.051396
Thermal correction to Gibbs Free Energy= 0.010154
Sum of electronic and zero-point Energies= -272.048957
Sum of electronic and thermal Energies= -272.042403
Sum of electronic and thermal Enthalpies= -272.041459
Sum of electronic and thermal Free Energies= -272.082702

```

**Table S21.**

(A) Geometry optimized for  $[\text{Pt}(\text{OH}_2)_2\text{H}]^+$  (singlet) computed at the M06 level of DFT using SDD(Pt) and 6-31+G\*\*(H,O) basis sets in vacuo.<sup>a</sup>

| Atom Label | X in angstrom | Y in angstrom | Z in angstrom | Mulliken Charge |
|------------|---------------|---------------|---------------|-----------------|
| Pt1        | 0.000002      | -0.010378     | -0.010508     | 0.452656        |
| O2         | -2.076585     | 0.024237      | 0.026691      | -0.703809       |
| O3         | 2.076558      | 0.024283      | 0.026573      | -0.703842       |
| H4         | -2.561096     | 0.455437      | -0.691428     | 0.448348        |
| H5         | -2.564671     | -0.751717     | 0.336751      | 0.448187        |
| H6         | 2.564820      | -0.750883     | 0.338288      | 0.448207        |
| H7         | 2.560994      | 0.454362      | -0.692252     | 0.448342        |
| H8         | 0.000016      | 1.014134      | 1.102170      | 0.161911        |

<sup>a</sup>Part of the Gaussian output file:

SCF Done: E(RM06) = -272.491154440 A.U. after 9 cycles

| Item          | Value    | Threshold | Converged? |
|---------------|----------|-----------|------------|
| Maximum Force | 0.000013 | 0.000450  | YES        |
| RMS Force     | 0.000005 | 0.000300  | YES        |

|                | 1       | 2        | 3        |
|----------------|---------|----------|----------|
|                | A       | A        | A        |
| Frequencies -- | 99.5050 | 153.7264 | 165.7230 |
| Red. masses -- | 1.0256  | 3.9796   | 6.7347   |
| Frc consts --  | 0.0060  | 0.0554   | 0.1090   |
| IR Inten --    | 0.2670  | 30.0153  | 10.7210  |

Zero-point correction= 0.058300 (Hartree/Particle)  
 Thermal correction to Energy= 0.065202  
 Thermal correction to Enthalpy= 0.066146  
 Thermal correction to Gibbs Free Energy= 0.027751  
 Sum of electronic and zero-point Energies= -272.432854  
 Sum of electronic and thermal Energies= -272.425953  
 Sum of electronic and thermal Enthalpies= -272.425009  
 Sum of electronic and thermal Free Energies= -272.463403

(B) Summary for the DFT calculation of  $[\text{Pt}(\text{OH}_2)_2\text{H}]^+$  (singlet) with solvation in water taken into consideration (C-PCM), at the M06 level of DFT with SDD(Pt) and 6-31+G\*\*(H,O) basis sets. Computed by the single-point calculation for its optimized structure in vacuo.<sup>a</sup>

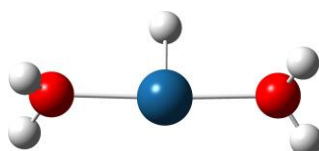

| Atom Label | X in angstrom | Y in angstrom | Z in angstrom | Mulliken Charge |
|------------|---------------|---------------|---------------|-----------------|
| Pt1        | -0.000032     | -0.015453     | 0.005027      | 0.597236        |
| O2         | -2.076387     | 0.039414      | -0.011479     | -0.726911       |

|    |           |           |           |           |
|----|-----------|-----------|-----------|-----------|
| O3 | 2.076276  | 0.018404  | -0.026710 | -0.728415 |
| H4 | -2.577189 | -0.655942 | -0.460975 | 0.451362  |
| H5 | -2.550224 | 0.330368  | 0.780506  | 0.451703  |
| H6 | 2.540169  | 0.608245  | 0.584505  | 0.450911  |
| H7 | 2.588337  | -0.790824 | -0.165124 | 0.453281  |
| H8 | 0.002311  | 1.250967  | -0.825539 | 0.050833  |

-----  
<sup>a</sup>Part of the Gaussian output file:

Zero-point correction= 0.056774 (Hartree/Particle)  
Thermal correction to Energy= 0.063595  
Thermal correction to Enthalpy= 0.064539  
Thermal correction to Gibbs Free Energy= 0.025834  
Sum of electronic and zero-point Energies= -272.548365  
Sum of electronic and thermal Energies= -272.541544  
Sum of electronic and thermal Enthalpies= -272.540600  
Sum of electronic and thermal Free Energies= -272.579305

**Table S22.**

(A) Geometry optimized for  $[\text{Pt}(\text{OH}_2)_2]^-$  (doublet) computed at the M06 level of DFT using SDD(Pt) and 6-31+G\*\*(H,O) basis sets in vacuo.<sup>a</sup>

| Atom Label | X in angstrom | Y in angstrom | Z in angstrom | Mulliken Charge | Spin Density |
|------------|---------------|---------------|---------------|-----------------|--------------|
| Pt1        | 0.000029      | -0.009691     | 0.000006      | -1.124472       | 0.999164     |
| O2         | 3.379595      | -0.011014     | -0.019629     | -0.634514       | 0.002381     |
| O3         | -3.381560     | -0.007255     | 0.018930      | -0.633150       | 0.002450     |
| H4         | 2.490733      | -0.399575     | -0.162750     | 0.356570        | -0.001217    |
| H5         | 3.133452      | 0.864196      | 0.299932      | 0.339318        | -0.000740    |
| H6         | -3.104471     | 0.860534      | -0.296598     | 0.340320        | -0.000797    |
| H7         | -2.506253     | -0.423083     | 0.164564      | 0.355928        | -0.001242    |

<sup>a</sup>Part of the Gaussian output file:

SCF Done: E(UM06) = -272.173312325 A.U. after 26 cycles  
 Annihilation of the first spin contaminant:  
 S\*\*2 before annihilation 0.7529, after 0.7500

| Item          | Value    | Threshold | Converged? |
|---------------|----------|-----------|------------|
| Maximum Force | 0.000332 | 0.000450  | YES        |
| RMS Force     | 0.000121 | 0.000300  | YES        |

|                | 1       | 2       | 3       |
|----------------|---------|---------|---------|
|                | A       | A       | A       |
| Frequencies -- | 10.5605 | 23.1158 | 57.8817 |
| Red. masses -- | 8.5043  | 7.4909  | 1.0561  |
| Frc consts --  | 0.0006  | 0.0024  | 0.0021  |
| IR Inten --    | 1.8973  | 5.6729  | 5.5409  |

Zero-point correction= 0.046061 (Hartree/Particle)  
 Thermal correction to Energy= 0.054310  
 Thermal correction to Enthalpy= 0.055255  
 Thermal correction to Gibbs Free Energy= 0.008910  
 Sum of electronic and zero-point Energies= -272.127252  
 Sum of electronic and thermal Energies= -272.119002  
 Sum of electronic and thermal Enthalpies= -272.118058  
 Sum of electronic and thermal Free Energies= -272.164402

(B) Summary for the DFT calculation of  $[\text{Pt}(\text{OH}_2)_2]^-$  (doublet) with solvation in water taken into consideration (C-PCM), at the M06 level of DFT with SDD(Pt) and 6-31+G\*\*(H,O) basis sets. Computed by the single-point calculation for its optimized structure in vacuo.<sup>a</sup>

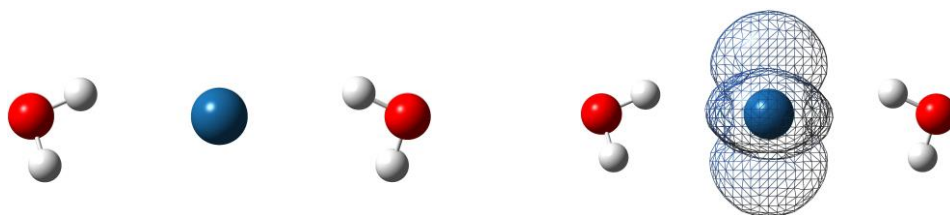

Spin density distribution



| Atom Label | X in angstrom | Y in angstrom | Z in angstrom | Mulliken Charge | Spin Density |
|------------|---------------|---------------|---------------|-----------------|--------------|
| Pt1        | -0.000029     | 0.009691      | 0.000006      | -1.098556       | 0.998803     |
| O2         | -3.379595     | 0.011014      | -0.019629     | -0.660800       | 0.002752     |
| O3         | 3.381561      | 0.007255      | 0.018930      | -0.658688       | 0.002810     |
| H4         | -2.490733     | 0.399575      | -0.162750     | 0.341227        | -0.001519    |
| H5         | -3.133452     | -0.864196     | 0.299932      | 0.367714        | -0.000626    |
| H6         | 3.104471      | -0.860534     | -0.296598     | 0.367260        | -0.000692    |
| H7         | 2.506253      | 0.423083      | 0.164564      | 0.341843        | -0.001528    |

<sup>a</sup>Part of the Gaussian output file:

Zero-point correction= 0.044277 (Hartree/Particle)  
 Thermal correction to Energy= 0.050663  
 Thermal correction to Enthalpy= 0.051607  
 Thermal correction to Gibbs Free Energy= 0.011015  
 Sum of electronic and zero-point Energies= -272.201489  
 Sum of electronic and thermal Energies= -272.195103  
 Sum of electronic and thermal Enthalpies= -272.194159  
 Sum of electronic and thermal Free Energies= -272.234751

**Table S23.**

(A) Geometry optimized for [Pt(OH<sub>2</sub>)H] (doublet) computed at the M06 level of DFT using SDD(Pt) and 6-31+G\*\*(H,O) basis sets in vacuo.<sup>a</sup>

| Atom Label | X in angstrom | Y in angstrom | Z in angstrom | Mulliken Charge | Spin Density |
|------------|---------------|---------------|---------------|-----------------|--------------|
| Pt1        | 0.253746      | -0.000008     | -0.000256     | -0.067436       | 1.007260     |
| O2         | -2.086945     | 0.000016      | -0.093811     | -0.718780       | 0.001902     |
| H3         | -2.456807     | -0.773915     | 0.346472      | 0.409758        | -0.000116    |
| H4         | -2.456680     | 0.774056      | 0.346387      | 0.409762        | -0.000113    |
| H5         | 1.816876      | 0.000371      | 0.077613      | -0.033304       | -0.008932    |

<sup>a</sup>Part of the Gaussian output file:

SCF Done: E(UM06) = -196.304643593 A.U. after 22 cycles

Annihilation of the first spin contaminant:

S\*\*2 before annihilation 0.7520, after 0.7500

| Item          | Value    | Threshold | Converged? |
|---------------|----------|-----------|------------|
| Maximum Force | 0.000008 | 0.000450  | YES        |
| RMS Force     | 0.000003 | 0.000300  | YES        |

|                | 1        | 2        | 3        |
|----------------|----------|----------|----------|
|                | A        | A        | A        |
| Frequencies -- | 269.8000 | 273.1938 | 409.4547 |
| Red. masses -- | 6.4101   | 1.0175   | 1.1174   |
| Frc consts --  | 0.2749   | 0.0447   | 0.1104   |
| IR Inten --    | 9.0896   | 8.3313   | 244.2310 |

Zero-point correction= 0.030999 (Hartree/Particle)

Thermal correction to Energy= 0.035428

Thermal correction to Enthalpy= 0.036372

Thermal correction to Gibbs Free Energy= 0.003251

Sum of electronic and zero-point Energies= -196.273645

Sum of electronic and thermal Energies= -196.269216

Sum of electronic and thermal Enthalpies= -196.268271

Sum of electronic and thermal Free Energies= -196.301392

(B) Summary for the DFT calculation of [Pt(OH<sub>2</sub>)H] (doublet) with solvation in water taken into consideration (C-PCM), at the M06 level of DFT with SDD(Pt) and 6-31+G\*\*(H,O) basis sets. Computed by the single-point calculation for its optimized structure in vacuo.<sup>a</sup>

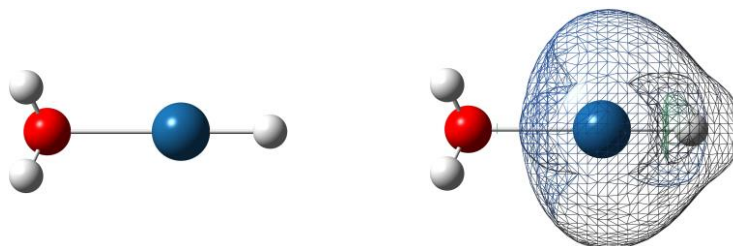

Spin density distribution

| Atom Label | X in angstrom | Y in angstrom | Z in angstrom | Mulliken Charge | Spin Density |
|------------|---------------|---------------|---------------|-----------------|--------------|
| Pt1        | 0.253746      | -0.000008     | -0.000256     | -0.011599       | 0.968458     |
| O2         | -2.086945     | 0.000016      | -0.093811     | -0.750090       | 0.005615     |
| H3         | -2.456807     | -0.773915     | 0.346472      | 0.429035        | 0.000236     |
| H4         | -2.456680     | 0.774056      | 0.346387      | 0.429034        | 0.000235     |
| H5         | 1.816876      | 0.000371      | 0.077613      | -0.096379       | 0.025455     |

<sup>a</sup>Part of the Gaussian output file:

Zero-point correction= 0.030386 (Hartree/Particle)  
 Thermal correction to Energy= 0.035036  
 Thermal correction to Enthalpy= 0.035980  
 Thermal correction to Gibbs Free Energy= 0.002433  
 Sum of electronic and zero-point Energies= -196.304202  
 Sum of electronic and thermal Energies= -196.299552  
 Sum of electronic and thermal Enthalpies= -196.298608  
 Sum of electronic and thermal Free Energies= -196.332154

**Table S24.**

(A) Geometry optimized for  $[\text{PtH}_2]^+$  (doublet) computed at the M06 level of DFT using SDD(Pt) and 6-31+G\*\*(H) basis sets in vacuo.<sup>a</sup>

| Atom Label | X in angstrom | Y in angstrom | Z in angstrom | Mulliken Charge | Spin Density |
|------------|---------------|---------------|---------------|-----------------|--------------|
| Pt1        | 0.000000      | 0.000000      | 0.029677      | 0.558061        | 0.910759     |
| H2         | 0.000000      | 0.965426      | -1.157391     | 0.220970        | 0.044620     |
| H3         | 0.000000      | -0.965426     | -1.157391     | 0.220970        | 0.044620     |

<sup>a</sup>Part of the Gaussian output file:

SCF Done: E(UM06) = -120.162864783 A.U. after 9 cycles

Annihilation of the first spin contaminant:

S\*\*2 before annihilation 0.7506, after 0.7500

| Item          | Value    | Threshold | Converged? |
|---------------|----------|-----------|------------|
| Maximum Force | 0.000041 | 0.000450  | YES        |
| RMS Force     | 0.000034 | 0.000300  | YES        |

|                | 1        | 2         | 3         |
|----------------|----------|-----------|-----------|
|                | A1       | B2        | A1        |
| Frequencies -- | 723.3082 | 2323.8583 | 2354.3568 |
| Red. masses -- | 1.0121   | 1.0120    | 1.0139    |
| Frc consts --  | 0.3120   | 3.2198    | 3.3112    |
| IR Inten --    | 7.3182   | 28.5319   | 81.4126   |

Zero-point correction= 0.012306 (Hartree/Particle)  
 Thermal correction to Energy= 0.015242  
 Thermal correction to Enthalpy= 0.016186  
 Thermal correction to Gibbs Free Energy= -0.010804  
 Sum of electronic and zero-point Energies= -120.150559  
 Sum of electronic and thermal Energies= -120.147623  
 Sum of electronic and thermal Enthalpies= -120.146679  
 Sum of electronic and thermal Free Energies= -120.173669

(B) Summary for the DFT calculation of  $[\text{PtH}_2]^+$  (doublet) with solvation in water taken into consideration (C-PCM), at the M06 level of DFT with SDD(Pt) and 6-31+G\*\*(H) basis sets. Computed by the single-point calculation for its optimized structure in vacuo.<sup>a</sup>

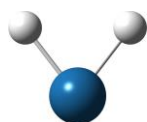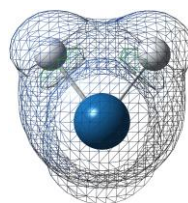

Spin density distribution

| Atom Label | X in angstrom | Y in angstrom | Z in angstrom | Mulliken Charge | Spin Density |
|------------|---------------|---------------|---------------|-----------------|--------------|
| Pt1        | 0.000000      | 0.000000      | 0.030446      | 0.880615        | 0.959484     |
| H2         | 0.000000      | 0.938062      | -1.187409     | 0.059692        | 0.020258     |
| H3         | 0.000000      | -0.938062     | -1.187409     | 0.059692        | 0.020258     |

<sup>a</sup>Part of the Gaussian output file:

Zero-point correction= 0.012531 (Hartree/Particle)  
 Thermal correction to Energy= 0.015453  
 Thermal correction to Enthalpy= 0.016397  
 Thermal correction to Gibbs Free Energy= -0.010574  
 Sum of electronic and zero-point Energies= -120.349051  
 Sum of electronic and thermal Energies= -120.346129  
 Sum of electronic and thermal Enthalpies= -120.345185  
 Sum of electronic and thermal Free Energies= -120.372157

**Table S25.**

(A) Geometry optimized for  $[\text{Pt}(\text{OH}_2)\text{H}]^-$  (singlet) computed at the M06 level of DFT using SDD(Pt) and 6-31+G\*\*(H,O) basis sets in vacuo.<sup>a</sup>

| Atom Label | X in angstrom | Y in angstrom | Z in angstrom | Mulliken Charge |
|------------|---------------|---------------|---------------|-----------------|
| Pt1        | 0.269919      | -0.000001     | -0.009562     | -1.123970       |
| O2         | -2.373284     | 0.000031      | -0.046849     | -0.499140       |
| H3         | -1.916774     | -0.761656     | 0.362073      | 0.330431        |
| H4         | -1.916414     | 0.761472      | 0.362184      | 0.330413        |
| H5         | 1.765809      | -0.000016     | 0.396388      | -0.037734       |

<sup>a</sup>Part of the Gaussian output file:

SCF Done: E(RM06) = -196.379904942 A.U. after 9 cycles

|               |          |           |            |
|---------------|----------|-----------|------------|
| Item          | Value    | Threshold | Converged? |
| Maximum Force | 0.000008 | 0.000450  | YES        |
| RMS Force     | 0.000004 | 0.000300  | YES        |

|                |          |          |          |
|----------------|----------|----------|----------|
|                | 1        | 2        | 3        |
|                | A        | A        | A        |
| Frequencies -- | 136.7257 | 386.9079 | 528.6790 |
| Red. masses -- | 8.5137   | 1.0185   | 1.0563   |
| Frc consts --  | 0.0938   | 0.0898   | 0.1739   |
| IR Inten --    | 31.9281  | 109.2473 | 79.5537  |

Zero-point correction= 0.030430 (Hartree/Particle)  
 Thermal correction to Energy= 0.034792  
 Thermal correction to Enthalpy= 0.035736  
 Thermal correction to Gibbs Free Energy= 0.003001  
 Sum of electronic and zero-point Energies= -196.349475  
 Sum of electronic and thermal Energies= -196.345113  
 Sum of electronic and thermal Enthalpies= -196.344169  
 Sum of electronic and thermal Free Energies= -196.376904

(B) Summary for the DFT calculation of  $[\text{Pt}(\text{OH}_2)\text{H}]^-$  (singlet) with solvation in water taken into consideration (C-PCM), at the M06 level of DFT with SDD(Pt) and 6-31+G\*\*(H,O) basis sets. Computed by the single-point calculation for its optimized structure in vacuo.<sup>a</sup>

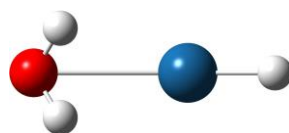

| Atom Label | X in angstrom | Y in angstrom | Z in angstrom | Mulliken Charge |
|------------|---------------|---------------|---------------|-----------------|
| Pt1        | -0.269919     | 0.000001      | -0.009562     | -1.079268       |
| O2         | 2.373284      | -0.000031     | -0.046849     | -0.547915       |
| H3         | 1.916774      | 0.761656      | 0.362074      | 0.354188        |
| H4         | 1.916414      | -0.761472     | 0.362184      | 0.354152        |
| H5         | -1.765809     | 0.000016      | 0.396388      | -0.081157       |

---

<sup>a</sup>Part of the Gaussian output file:

|                                              |                             |
|----------------------------------------------|-----------------------------|
| Zero-point correction=                       | 0.029198 (Hartree/Particle) |
| Thermal correction to Energy=                | 0.033238                    |
| Thermal correction to Enthalpy=              | 0.034182                    |
| Thermal correction to Gibbs Free Energy=     | 0.002193                    |
| Sum of electronic and zero-point Energies=   | -196.437199                 |
| Sum of electronic and thermal Energies=      | -196.433160                 |
| Sum of electronic and thermal Enthalpies=    | -196.432216                 |
| Sum of electronic and thermal Free Energies= | -196.464205                 |

**Table S26.**

(A) Geometry optimized for [PtH<sub>2</sub>] (singlet) computed at the M06 level of DFT using SDD(Pt) and 6-31+G\*\*(H) basis sets in vacuo.<sup>a</sup>

| Atom Label | X in angstrom | Y in angstrom | Z in angstrom | Mulliken Charge |
|------------|---------------|---------------|---------------|-----------------|
| Pt1        | 0.000000      | 0.000000      | 0.028644      | -0.134731       |
| H2         | 0.000000      | 1.006612      | -1.117129     | 0.067366        |
| H3         | 0.000000      | -1.006612     | -1.117129     | 0.067366        |

<sup>a</sup>Part of the Gaussian output file:

SCF Done: E(RM06) = -120.513288164 A.U. after 7 cycles

| Item          | Value    | Threshold | Converged? |
|---------------|----------|-----------|------------|
| Maximum Force | 0.000056 | 0.000450  | YES        |
| RMS Force     | 0.000046 | 0.000300  | YES        |

|                | 1        | 2  | 3                   |
|----------------|----------|----|---------------------|
|                | A1       | B2 | A1                  |
| Frequencies -- | 736.4392 |    | 2317.4162 2380.1545 |
| Red. masses -- | 1.0123   |    | 1.0123 1.0136       |
| Frc consts --  | 0.3235   |    | 3.2032 3.3833       |
| IR Inten --    | 1.9471   |    | 44.3644 2.6241      |

Zero-point correction= 0.012380 (Hartree/Particle)  
 Thermal correction to Energy= 0.015311  
 Thermal correction to Enthalpy= 0.016255  
 Thermal correction to Gibbs Free Energy= -0.010077  
 Sum of electronic and zero-point Energies= -120.500909  
 Sum of electronic and thermal Energies= -120.497977  
 Sum of electronic and thermal Enthalpies= -120.497033  
 Sum of electronic and thermal Free Energies= -120.523365

(B) Summary for the DFT calculation of [PtH<sub>2</sub>] (singlet) with solvation in water taken into consideration (C-PCM), at the M06 level of DFT with SDD(Pt) and 6-31+G\*\*(H) basis sets. Computed by the single-point calculation for its optimized structure in vacuo.<sup>a</sup>

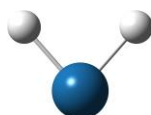

| Atom Label | X in angstrom | Y in angstrom | Z in angstrom | Mulliken Charge |
|------------|---------------|---------------|---------------|-----------------|
| Pt1        | 0.000000      | 0.000000      | 0.028644      | 0.034948        |
| H2         | 0.000000      | 1.006612      | -1.117129     | -0.017474       |
| H3         | 0.000000      | -1.006612     | -1.117129     | -0.017474       |

<sup>a</sup>Part of the Gaussian output file:

Zero-point correction= 0.012670 (Hartree/Particle)



|                                              |             |
|----------------------------------------------|-------------|
| Thermal correction to Energy=                | 0.015575    |
| Thermal correction to Enthalpy=              | 0.016519    |
| Thermal correction to Gibbs Free Energy=     | -0.009776   |
| Sum of electronic and zero-point Energies=   | -120.533798 |
| Sum of electronic and thermal Energies=      | -120.530894 |
| Sum of electronic and thermal Enthalpies=    | -120.529949 |
| Sum of electronic and thermal Free Energies= | -120.556245 |

**Table S27.** (A) Geometry optimized for  $[\text{PtH}_3]^+$  (singlet) computed at the M06 level of DFT using SDD(Pt) and 6-31+G\*\*(H) basis sets in vacuo.<sup>a</sup>

| Atom Label | X in angstrom | Y in angstrom | Z in angstrom | Mulliken Charge |
|------------|---------------|---------------|---------------|-----------------|
| Pt1        | 0.036926      | -0.000056     | 0.000157      | 0.318046        |
| H2         | -0.967191     | -0.010631     | 1.144811      | 0.227438        |
| H3         | -0.958650     | -0.990723     | -0.588988     | 0.227342        |
| H4         | -0.954381     | 1.005758      | -0.568081     | 0.227174        |

<sup>a</sup>Part of the Gaussian output file:

SCF Done: E(RM06) = -120.797360578 A.U. after 1 cycles

| Item          | Value    | Threshold | Converged? |
|---------------|----------|-----------|------------|
| Maximum Force | 0.000295 | 0.000450  | YES        |
| RMS Force     | 0.000159 | 0.000300  | YES        |

|                | 1        | 2        | 3        |
|----------------|----------|----------|----------|
|                | A        | A        | A        |
| Frequencies -- | 817.6731 | 837.2736 | 889.7916 |
| Red. masses -- | 1.0097   | 1.0097   | 1.0167   |
| Frc consts --  | 0.3978   | 0.4170   | 0.4743   |
| IR Inten --    | 3.1825   | 3.2143   | 19.2045  |

Zero-point correction= 0.022152 (Hartree/Particle)  
 Thermal correction to Energy= 0.025183  
 Thermal correction to Enthalpy= 0.026127  
 Thermal correction to Gibbs Free Energy= -0.001635  
 Sum of electronic and zero-point Energies= -120.775208  
 Sum of electronic and thermal Energies= -120.772178  
 Sum of electronic and thermal Enthalpies= -120.771233  
 Sum of electronic and thermal Free Energies= -120.798996

(B) Summary for the DFT calculation of  $[\text{PtH}_3]^+$  (singlet) with solvation in water taken into consideration (C-PCM), at the M06 level of DFT with SDD(Pt) and 6-31+G\*\*(H) basis sets. Computed by the single-point calculation for its optimized structure in vacuo.<sup>a</sup>

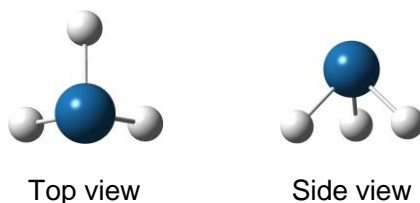

| Atom Label | X in angstrom | Y in angstrom | Z in angstrom | Mulliken Charge |
|------------|---------------|---------------|---------------|-----------------|
| Pt1        | 0.036926      | -0.000056     | 0.000157      | 0.706114        |
| H2         | -0.967191     | -0.010631     | 1.144811      | 0.097975        |
| H3         | -0.958650     | -0.990723     | -0.588988     | 0.098004        |
| H4         | -0.954381     | 1.005758      | -0.568081     | 0.097906        |

-----  
Part of the Gaussian output file:

|                                              |                             |
|----------------------------------------------|-----------------------------|
| Zero-point correction=                       | 0.022945 (Hartree/Particle) |
| Thermal correction to Energy=                | 0.025928                    |
| Thermal correction to Enthalpy=              | 0.026872                    |
| Thermal correction to Gibbs Free Energy=     | -0.000828                   |
| Sum of electronic and zero-point Energies=   | -120.957453                 |
| Sum of electronic and thermal Energies=      | -120.954470                 |
| Sum of electronic and thermal Enthalpies=    | -120.953526                 |
| Sum of electronic and thermal Free Energies= | -120.981227                 |

**Table S28.** (A) Geometry optimized for [Pt<sub>2</sub>] (triplet) computed at the M06 level of DFT using SDD(Pt) basis set in vacuo.<sup>a</sup>

| Atom Label | X in angstrom | Y in angstrom | Z in angstrom | Mulliken Charge | Spin Density |
|------------|---------------|---------------|---------------|-----------------|--------------|
| Pt1        | 0.000000      | 0.000000      | 1.198356      | 0.000000        | 1.000000     |
| Pt2        | 0.000000      | 0.000000      | -1.198356     | 0.000000        | 1.000000     |

<sup>a</sup>Part of the Gaussian output file:

SCF Done: E(UM06) = -238.634690825 A.U. after 9 cycles

Annihilation of the first spin contaminant:

S\*\*2 before annihilation 2.0186, after 2.0001

| Item          | Value    | Threshold | Converged? |
|---------------|----------|-----------|------------|
| Maximum Force | 0.000000 | 0.000450  | YES        |
| RMS Force     | 0.000000 | 0.000300  | YES        |

1  
SGG  
Frequencies -- 217.8236  
Red. masses -- 194.9648  
Frc consts -- 5.4502  
IR Inten -- 0.0000

Zero-point correction= 0.000496 (Hartree/Particle)  
Thermal correction to Energy= 0.003390  
Thermal correction to Enthalpy= 0.004334  
Thermal correction to Gibbs Free Energy= -0.027074  
Sum of electronic and zero-point Energies= -238.634195  
Sum of electronic and thermal Energies= -238.631301  
Sum of electronic and thermal Enthalpies= -238.630357  
Sum of electronic and thermal Free Energies= -238.661765

(B) Summary for the DFT calculation of [Pt<sub>2</sub>] (triplet) with solvation in water taken into consideration (C-PCM), at the M06 level of DFT with SDD(Pt) basis set. Computed by the single-point calculation for its optimized structure in vacuo.<sup>a</sup>

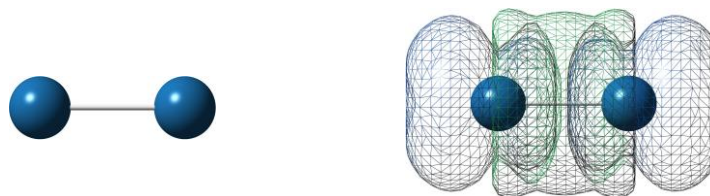

Spin density distribution

| Atom Label | X in angstrom | Y in angstrom | Z in angstrom | Mulliken Charge | Spin Density |
|------------|---------------|---------------|---------------|-----------------|--------------|
| Pt1        | 0.000000      | 0.000000      | 1.198356      | 0.000000        | 1.000000     |
| Pt2        | 0.000000      | 0.000000      | -1.198356     | 0.000000        | 1.000000     |

<sup>a</sup>Part of the Gaussian output file:

|                                              |                             |
|----------------------------------------------|-----------------------------|
| Zero-point correction=                       | 0.000534 (Hartree/Particle) |
| Thermal correction to Energy=                | 0.003403                    |
| Thermal correction to Enthalpy=              | 0.004347                    |
| Thermal correction to Gibbs Free Energy=     | -0.026998                   |
| Sum of electronic and zero-point Energies=   | -238.665695                 |
| Sum of electronic and thermal Energies=      | -238.662825                 |
| Sum of electronic and thermal Enthalpies=    | -238.661881                 |
| Sum of electronic and thermal Free Energies= | -238.693227                 |

**Table S29.**

(A) Geometry optimized for  $[\text{Pt}_2\text{H}]^+$  (triplet) computed at the M06 level of DFT using SDD(Pt) and 6-31+G\*\*(H) basis sets in vacuo.<sup>a</sup>

| Atom Label | X in angstrom | Y in angstrom | Z in angstrom | Mulliken Charge | Spin Density |
|------------|---------------|---------------|---------------|-----------------|--------------|
| Pt1        | 0.000000      | 1.226753      | -0.008031     | 0.448765        | 1.009741     |
| Pt2        | 0.000000      | -1.226753     | -0.008031     | 0.448765        | 1.009741     |
| H3         | 0.000000      | 0.000000      | 1.252770      | 0.102471        | -0.019483    |

<sup>a</sup>Part of the Gaussian output file:

SCF Done: E(UM06) = -238.924501406 A.U. after 24 cycles

Annihilation of the first spin contaminant:

S\*\*2 before annihilation 2.0181, after 2.0002

| Item          | Value    | Threshold | Converged? |
|---------------|----------|-----------|------------|
| Maximum Force | 0.000356 | 0.000450  | YES        |
| RMS Force     | 0.000211 | 0.000300  | YES        |

|                | 1        | 2        | 3         |
|----------------|----------|----------|-----------|
|                | A1       | B2       | A1        |
| Frequencies -- | 199.8507 | 735.2953 | 1598.5905 |
| Red. masses -- | 138.4448 | 1.0132   | 1.0126    |
| Frc consts --  | 3.2579   | 0.3227   | 1.5246    |
| IR Inten --    | 0.0074   | 21.8725  | 0.2653    |

Zero-point correction= 0.005772 (Hartree/Particle)  
 Thermal correction to Energy= 0.009268  
 Thermal correction to Enthalpy= 0.010212  
 Thermal correction to Gibbs Free Energy= -0.023869  
 Sum of electronic and zero-point Energies= -238.918729  
 Sum of electronic and thermal Energies= -238.915233  
 Sum of electronic and thermal Enthalpies= -238.914289  
 Sum of electronic and thermal Free Energies= -238.948370

(B) Summary for the DFT calculation of  $[\text{Pt}_2\text{H}]^+$  (triplet) with solvation in water taken into consideration (C-PCM), at the M06 level of DFT with SDD(Pt) and 6-31+G\*\*(H) basis sets. Computed by the single-point calculation for its optimized structure in vacuo.<sup>a</sup>

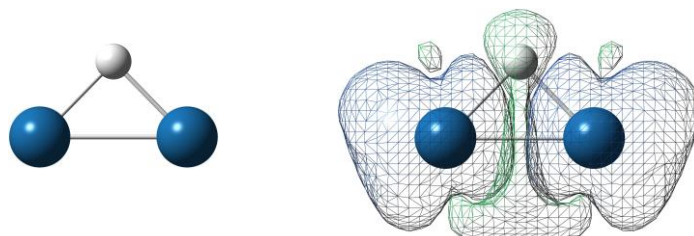

Spin density distribution

| Atom Label | X in angstrom | Y in angstrom | Z in angstrom | Mulliken Charge | Spin Density |
|------------|---------------|---------------|---------------|-----------------|--------------|
| Pt1        | 0.000000      | 1.226753      | -0.008031     | 0.513062        | 1.013779     |
| Pt2        | 0.000000      | -1.226753     | -0.008031     | 0.513062        | 1.013779     |
| H3         | 0.000000      | 0.000000      | 1.252771      | -0.026125       | -0.027558    |

<sup>a</sup>Part of the Gaussian output file:

Zero-point correction= 0.005580 (Hartree/Particle)  
 Thermal correction to Energy= 0.009108  
 Thermal correction to Enthalpy= 0.010052  
 Thermal correction to Gibbs Free Energy= -0.024058  
 Sum of electronic and zero-point Energies= -239.127237  
 Sum of electronic and thermal Energies= -239.123709  
 Sum of electronic and thermal Enthalpies= -239.122765  
 Sum of electronic and thermal Free Energies= -239.156875

**Table S30.**

(A) Geometry optimized for  $[\text{Pt}_2]^-$  (doublet) computed at the M06 level of DFT using SDD(Pt) basis set in vacuo.<sup>a</sup>

| Atom Label | X in angstrom | Y in angstrom | Z in angstrom | Mulliken Charge | Spin Density |
|------------|---------------|---------------|---------------|-----------------|--------------|
| Pt1        | 0.000000      | 0.000000      | 1.248630      | -0.500000       | 0.500000     |
| Pt2        | 0.000000      | 0.000000      | -1.248630     | -0.500000       | 0.500000     |

<sup>a</sup>Part of the Gaussian output file:

SCF Done: E(UM06) = -238.720204752 A.U. after 14 cycles

Annihilation of the first spin contaminant:

S\*\*2 before annihilation 0.7998, after 0.7504

| Item          | Value    | Threshold | Converged? |
|---------------|----------|-----------|------------|
| Maximum Force | 0.000001 | 0.000450  | YES        |
| RMS Force     | 0.000001 | 0.000300  | YES        |

1  
SGG

Frequencies -- 186.5738

Red. masses -- 194.9648

Frc consts -- 3.9986

IR Inten -- 0.0000

Zero-point correction= 0.000425 (Hartree/Particle)

Thermal correction to Energy= 0.003368

Thermal correction to Enthalpy= 0.004312

Thermal correction to Gibbs Free Energy= -0.026927

Sum of electronic and zero-point Energies= -238.719780

Sum of electronic and thermal Energies= -238.716837

Sum of electronic and thermal Enthalpies= -238.715893

Sum of electronic and thermal Free Energies= -238.747132

(B) Summary for the DFT calculation of  $[\text{Pt}_2]^-$  (doublet) with solvation in water taken into consideration (C-PCM), at the M06 level of DFT with SDD(Pt) basis set. Computed by the single-point calculation for its optimized structure in vacuo.<sup>a</sup>

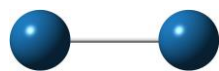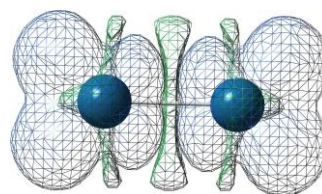

Spin density distribution

| Atom Label | X in angstrom | Y in angstrom | Z in angstrom | Mulliken Charge | Spin Density |
|------------|---------------|---------------|---------------|-----------------|--------------|
| Pt1        | 0.000000      | 0.000000      | 1.248630      | -0.500000       | 0.500000     |



|     |          |          |           |           |          |
|-----|----------|----------|-----------|-----------|----------|
| Pt2 | 0.000000 | 0.000000 | -1.248630 | -0.500000 | 0.500000 |
|-----|----------|----------|-----------|-----------|----------|

---

<sup>a</sup>Part of the Gaussian output file:

|                                              |                             |
|----------------------------------------------|-----------------------------|
| Zero-point correction=                       | 0.000416 (Hartree/Particle) |
| Thermal correction to Energy=                | 0.003365                    |
| Thermal correction to Enthalpy=              | 0.004309                    |
| Thermal correction to Gibbs Free Energy=     | -0.026948                   |
| Sum of electronic and zero-point Energies=   | -238.779042                 |
| Sum of electronic and thermal Energies=      | -238.776093                 |
| Sum of electronic and thermal Enthalpies=    | -238.775149                 |
| Sum of electronic and thermal Free Energies= | -238.806406                 |

**Table S31.**

(A) Geometry optimized for [Pt<sub>2</sub>H] (doublet) computed at the M06 level of DFT using SDD(Pt) and 6-31+G\*\*(H) basis sets in vacuo.<sup>a</sup>

| Atom Label | X in angstrom | Y in angstrom | Z in angstrom | Mulliken Charge | Spin Density |
|------------|---------------|---------------|---------------|-----------------|--------------|
| Pt1        | 0.000000      | 1.266181      | -0.007503     | -0.027717       | 0.501234     |
| Pt2        | 0.000000      | -1.266181     | -0.007503     | -0.027717       | 0.501234     |
| H3         | 0.000000      | 0.000000      | 1.170424      | 0.055433        | -0.002468    |

<sup>a</sup>Part of the Gaussian output file:

SCF Done: E(UM06) = -239.247524200 A.U. after 15 cycles

Annihilation of the first spin contaminant:

S\*\*2 before annihilation 0.7585, after 0.7500

| Item          | Value    | Threshold | Converged? |
|---------------|----------|-----------|------------|
| Maximum Force | 0.000159 | 0.000450  | YES        |
| RMS Force     | 0.000151 | 0.000300  | YES        |

|                | 1        | 2        | 3         |
|----------------|----------|----------|-----------|
|                | A1       | B2       | A1        |
| Frequencies -- | 181.0064 | 741.6041 | 1580.3253 |
| Red. masses -- | 132.8387 | 1.0127   | 1.0129    |
| Frc consts --  | 2.5643   | 0.3281   | 1.4904    |
| IR Inten --    | 0.0004   | 11.9880  | 18.2817   |

Zero-point correction= 0.005702 (Hartree/Particle)  
 Thermal correction to Energy= 0.009226  
 Thermal correction to Enthalpy= 0.010170  
 Thermal correction to Gibbs Free Energy= -0.023608  
 Sum of electronic and zero-point Energies= -239.241822  
 Sum of electronic and thermal Energies= -239.238298  
 Sum of electronic and thermal Enthalpies= -239.237354  
 Sum of electronic and thermal Free Energies= -239.271132

(B) Summary for the DFT calculation of [Pt<sub>2</sub>H] (doublet) with solvation in water taken into consideration (C-PCM), at the M06 level of DFT with SDD(Pt) and 6-31+G\*\*(H) basis sets. Computed by the single-point calculation for its optimized structure in vacuo.<sup>a</sup>

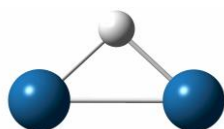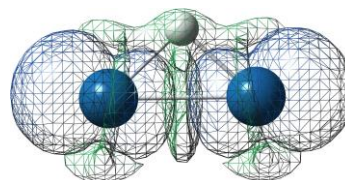

Spin density distribution

| Atom Label | X in angstrom | Y in angstrom | Z in angstrom | Mulliken Charge | Spin Density |
|------------|---------------|---------------|---------------|-----------------|--------------|
| Pt1        | 0.000000      | 1.266181      | -0.007503     | 0.011562        | 0.502536     |
| Pt2        | 0.000000      | -1.266181     | -0.007503     | 0.011562        | 0.502536     |
| H3         | 0.000000      | 0.000000      | 1.170424      | -0.023124       | -0.005072    |

<sup>a</sup>Part of the Gaussian output file:

Zero-point correction= 0.005585 (Hartree/Particle)  
 Thermal correction to Energy= 0.009162  
 Thermal correction to Enthalpy= 0.010106  
 Thermal correction to Gibbs Free Energy= -0.023796  
 Sum of electronic and zero-point Energies= -239.280079  
 Sum of electronic and thermal Energies= -239.276502  
 Sum of electronic and thermal Enthalpies= -239.275558  
 Sum of electronic and thermal Free Energies= -239.309461

**Table S32.**

(A) Geometry optimized for  $[\text{Pt}_2\text{H}_2]^+$  (doublet) computed at the M06 level of DFT using SDD(Pt) and 6-31+G\*\*(H) basis sets in vacuo.<sup>a</sup>

| Atom Label | X in angstrom | Y in angstrom | Z in angstrom | Mulliken Charge | Spin Density |
|------------|---------------|---------------|---------------|-----------------|--------------|
| Pt1        | 0.000000      | 1.238860      | 0.000000      | 0.338947        | 0.513201     |
| Pt2        | 0.000000      | -1.238860     | 0.000000      | 0.338947        | 0.513201     |
| H3         | 1.511627      | 1.049044      | 0.000000      | 0.161053        | -0.013201    |
| H4         | -1.511627     | -1.049044     | 0.000000      | 0.161053        | -0.013201    |

<sup>a</sup>Part of the Gaussian output file:

SCF Done: E(UM06) = -239.548271053 A.U. after 10 cycles

Annihilation of the first spin contaminant:

S\*\*2 before annihilation 0.7549, after 0.7500

| Item          | Value    | Threshold | Converged? |
|---------------|----------|-----------|------------|
| Maximum Force | 0.000032 | 0.000450  | YES        |
| RMS Force     | 0.000019 | 0.000300  | YES        |

|                | 1<br>AG  | 2<br>AU | 3<br>AG  |
|----------------|----------|---------|----------|
| Frequencies -- | 194.4210 |         | 219.0035 |
| Red. masses -- | 179.7780 |         | 1.0130   |
| Frc consts --  | 4.0038   |         | 0.0286   |
| IR Inten --    | 0.0000   | 2.7339  | 0.0000   |

Zero-point correction= 0.014245 (Hartree/Particle)

Thermal correction to Energy= 0.018610

Thermal correction to Enthalpy= 0.019554

Thermal correction to Gibbs Free Energy= -0.016097

Sum of electronic and zero-point Energies= -239.534026

Sum of electronic and thermal Energies= -239.529661

Sum of electronic and thermal Enthalpies= -239.528717

Sum of electronic and thermal Free Energies= -239.564368

(B) Summary for the DFT calculation of  $[\text{Pt}_2\text{H}_2]^+$  (doublet) with solvation in water taken into consideration (C-PCM), at the M06 level of DFT with SDD(Pt) and 6-31+G\*\*(H) basis sets. Computed by the single-point calculation for its optimized structure in vacuo.<sup>a</sup>

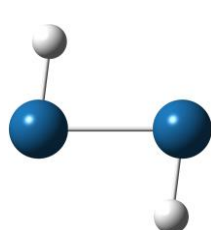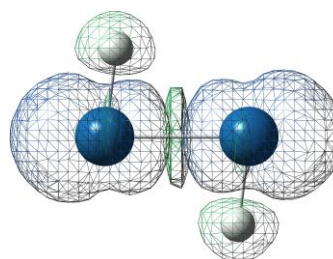

Spin density distribution

| Atom Label | X in angstrom | Y in angstrom | Z in angstrom | Mulliken Charge | Spin Density |
|------------|---------------|---------------|---------------|-----------------|--------------|
| Pt1        | 0.000000      | 1.238860      | 0.000000      | 0.477566        | 0.514252     |
| Pt2        | 0.000000      | -1.238860     | 0.000000      | 0.477566        | 0.514252     |
| H3         | 1.511627      | 1.049044      | 0.000000      | 0.022434        | -0.014252    |
| H4         | -1.511627     | -1.049044     | 0.000000      | 0.022434        | -0.014252    |

<sup>a</sup>Part of the Gaussian output file:

Zero-point correction= 0.011963 (Hartree/Particle)  
 Thermal correction to Energy= 0.015829  
 Thermal correction to Enthalpy= 0.016773  
 Thermal correction to Gibbs Free Energy= -0.018112  
 Sum of electronic and zero-point Energies= -239.736440  
 Sum of electronic and thermal Energies= -239.732574  
 Sum of electronic and thermal Enthalpies= -239.731630  
 Sum of electronic and thermal Free Energies= -239.766515

**Table S33.**

(A) Geometry optimized for  $[\text{Pt}_2\text{H}]^-$  (singlet) computed at the M06 level of DFT using SDD(Pt) and 6-31+G\*\*(H) basis sets in vacuo.<sup>a</sup>

| Atom Label | X in angstrom | Y in angstrom | Z in angstrom | Mulliken Charge |
|------------|---------------|---------------|---------------|-----------------|
| Pt1        | 0.000000      | 1.327729      | -0.006893     | -0.515820       |
| Pt2        | 0.000000      | -1.327729     | -0.006893     | -0.515820       |
| H3         | 0.000000      | 0.000000      | 1.075304      | 0.031640        |

<sup>a</sup>Part of the Gaussian output file:

SCF Done: E(UM06) = -239.328043980 A.U. after 12 cycles

| Item          | Value    | Threshold | Converged? |
|---------------|----------|-----------|------------|
| Maximum Force | 0.000026 | 0.000450  | YES        |
| RMS Force     | 0.000024 | 0.000300  | YES        |

|                | 1        | 2        | 3         |
|----------------|----------|----------|-----------|
|                | A1       | B2       | A1        |
| Frequencies -- | 142.2125 | 988.4580 | 1360.8039 |
| Red. masses -- | 109.1582 | 1.0121   | 1.0145    |
| Frc consts --  | 1.3007   | 0.5826   | 1.1069    |
| IR Inten --    | 0.0132   | 208.3272 | 36.6561   |

Zero-point correction= 0.005676 (Hartree/Particle)  
 Thermal correction to Energy= 0.009213  
 Thermal correction to Enthalpy= 0.010157  
 Thermal correction to Gibbs Free Energy= -0.023122  
 Sum of electronic and zero-point Energies= -239.322368  
 Sum of electronic and thermal Energies= -239.318831  
 Sum of electronic and thermal Enthalpies= -239.317887  
 Sum of electronic and thermal Free Energies= -239.351166

(B) Summary for the DFT calculation of  $[\text{Pt}_2\text{H}]^-$  (singlet) with solvation in water taken into consideration (C-PCM), at the M06 level of DFT with SDD(Pt) and 6-31+G\*\*(H) basis sets. Computed by the single-point calculation for its optimized structure in vacuo.<sup>a</sup>

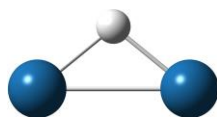

| Atom Label | X in angstrom | Y in angstrom | Z in angstrom | Mulliken Charge |
|------------|---------------|---------------|---------------|-----------------|
| Pt1        | 0.000000      | 1.327729      | -0.006893     | -0.479384       |
| Pt2        | 0.000000      | -1.327729     | -0.006893     | -0.479384       |
| H3         | 0.000000      | 0.000000      | 1.075304      | -0.041231       |

<sup>a</sup>Part of the Gaussian output file:

Zero-point correction= 0.005152 (Hartree/Particle)  
 Thermal correction to Energy= 0.008707

|                                              |             |
|----------------------------------------------|-------------|
| Thermal correction to Enthalpy=              | 0.009651    |
| Thermal correction to Gibbs Free Energy=     | -0.023651   |
| Sum of electronic and zero-point Energies=   | -239.402524 |
| Sum of electronic and thermal Energies=      | -239.398970 |
| Sum of electronic and thermal Enthalpies=    | -239.398026 |
| Sum of electronic and thermal Free Energies= | -239.431328 |

**Table S34.**

(A) Geometry optimized for [Pt<sub>2</sub>H<sub>2</sub>] (singlet) computed at the M06 level of DFT using SDD(Pt) and 6-31+G\*\*(H) basis sets in vacuo.<sup>a</sup>

| Atom Label | X in angstrom | Y in angstrom | Z in angstrom | Mulliken Charge |
|------------|---------------|---------------|---------------|-----------------|
| Pt1        | -1.272794     | 0.013960      | 0.011154      | -0.076738       |
| Pt2        | 1.272800      | -0.013959     | 0.011151      | -0.076793       |
| H3         | 1.136593      | 1.219041      | -0.869931     | 0.076769        |
| H4         | -1.137003     | -1.219117     | -0.869873     | 0.076761        |

<sup>a</sup>Part of the Gaussian output file:

SCF Done: E(RM06) = -239.863367375 A.U. after 10 cycles

|               |          |           |            |
|---------------|----------|-----------|------------|
| Item          | Value    | Threshold | Converged? |
| Maximum Force | 0.000011 | 0.000450  | YES        |
| RMS Force     | 0.000007 | 0.000300  | YES        |

|                | 1        | 2        | 3        |
|----------------|----------|----------|----------|
|                | A        | A        | A        |
| Frequencies -- | 173.2425 | 247.7200 | 390.0014 |
| Red. masses -- | 117.0366 | 1.0136   | 1.0151   |
| Frc consts --  | 2.0696   | 0.0366   | 0.0910   |
| IR Inten --    | 0.0823   | 8.5593   | 13.2721  |

|                                              |                             |
|----------------------------------------------|-----------------------------|
| Zero-point correction=                       | 0.013508 (Hartree/Particle) |
| Thermal correction to Energy=                | 0.018045                    |
| Thermal correction to Enthalpy=              | 0.018989                    |
| Thermal correction to Gibbs Free Energy=     | -0.017014                   |
| Sum of electronic and zero-point Energies=   | -239.849859                 |
| Sum of electronic and thermal Energies=      | -239.845322                 |
| Sum of electronic and thermal Enthalpies=    | -239.844378                 |
| Sum of electronic and thermal Free Energies= | -239.880382                 |

(B) Summary for the DFT calculation of [Pt<sub>2</sub>H<sub>2</sub>] (singlet) with solvation in water taken into consideration (C-PCM), at the M06 level of DFT with SDD(Pt) and 6-31+G\*\*(H) basis sets. Computed by the single-point calculation for its optimized structure in vacuo.<sup>a</sup>

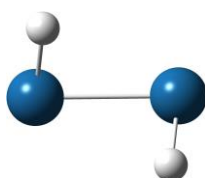

| Atom Label | X in angstrom | Y in angstrom | Z in angstrom | Mulliken Charge |
|------------|---------------|---------------|---------------|-----------------|
| Pt1        | -1.272794     | -0.013960     | -0.011154     | 0.023924        |
| Pt2        | 1.272800      | 0.013959      | -0.011151     | 0.023884        |
| H3         | 1.136593      | -1.219041     | 0.869931      | -0.023896       |
| H4         | -1.137003     | 1.219117      | 0.869873      | -0.023912       |



<sup>a</sup>Part of the Gaussian output file:

|                                              |                             |
|----------------------------------------------|-----------------------------|
| Zero-point correction=                       | 0.014208 (Hartree/Particle) |
| Thermal correction to Energy=                | 0.018485                    |
| Thermal correction to Enthalpy=              | 0.019429                    |
| Thermal correction to Gibbs Free Energy=     | -0.016163                   |
| Sum of electronic and zero-point Energies=   | -239.897351                 |
| Sum of electronic and thermal Energies=      | -239.893074                 |
| Sum of electronic and thermal Enthalpies=    | -239.892130                 |
| Sum of electronic and thermal Free Energies= | -239.927721                 |

**Table S35.**

(A) Geometry optimized for [Pt<sub>2</sub>H<sub>2</sub>] (triplet) computed at the M06 level of DFT using SDD(Pt) and 6-31+G\*\*(H) basis sets in vacuo.<sup>a</sup>

| Atom Label | X in angstrom | Y in angstrom | Z in angstrom | Mulliken Charge | Spin Density |
|------------|---------------|---------------|---------------|-----------------|--------------|
| Pt1        | -1.283919     | 0.019395      | -0.001905     | -0.051685       | 0.934055     |
| Pt2        | 1.283915      | 0.019399      | 0.001905      | -0.051674       | 0.934155     |
| H3         | 1.426271      | -1.512987     | -0.133769     | 0.051673        | 0.065912     |
| H4         | -1.425990     | -1.513007     | 0.133768      | 0.051687        | 0.065878     |

<sup>a</sup>Part of the Gaussian output file:

SCF Done: E(UM06) = -239.829065901 A.U. after 14 cycles

Annihilation of the first spin contaminant:

S\*\*2 before annihilation 2.0097, after 2.0000

| Item          | Value    | Threshold | Converged? |
|---------------|----------|-----------|------------|
| Maximum Force | 0.000017 | 0.000450  | YES        |
| RMS Force     | 0.000013 | 0.000300  | YES        |

|                | 1        | 2        | 3        |
|----------------|----------|----------|----------|
|                | A        | A        | A        |
| Frequencies -- | 165.2987 | 250.0044 | 255.9441 |
| Red. masses -- | 93.4637  | 1.0178   | 1.0209   |
| Frc consts --  | 1.5046   | 0.0375   | 0.0394   |
| IR Inten --    | 0.1216   | 0.5095   | 72.3789  |

Zero-point correction= 0.012787 (Hartree/Particle)

Thermal correction to Energy= 0.017402

Thermal correction to Enthalpy= 0.018346

Thermal correction to Gibbs Free Energy= -0.018939

Sum of electronic and zero-point Energies= -239.816279

Sum of electronic and thermal Energies= -239.811664

Sum of electronic and thermal Enthalpies= -239.810719

Sum of electronic and thermal Free Energies= -239.848005

(B) Summary for the DFT calculation of [Pt<sub>2</sub>H<sub>2</sub>] (triplet) with solvation in water taken into consideration (C-PCM), at the M06 level of DFT with SDD(Pt) and 6-31+G\*\*(H) basis sets. Computed by the single-point calculation for its optimized structure in vacuo.<sup>a</sup>

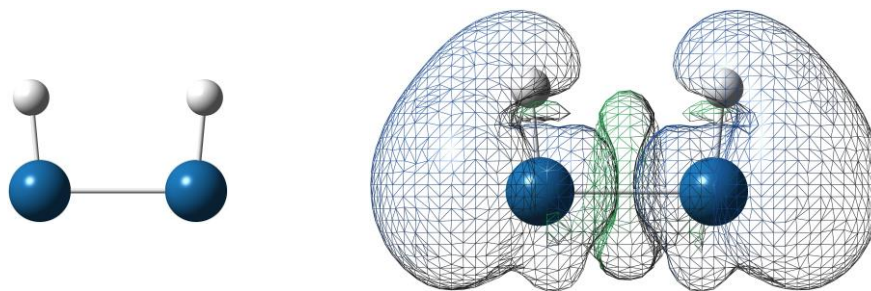

Spin density distribution

| Atom Label | X in angstrom | Y in angstrom | Z in angstrom | Mulliken Charge | Spin Density |
|------------|---------------|---------------|---------------|-----------------|--------------|
| Pt1        | -1.283919     | -0.019395     | 0.001905      | 0.067327        | 0.951315     |
| Pt2        | 1.283915      | -0.019399     | -0.001905     | 0.067314        | 0.951371     |
| H3         | 1.426271      | 1.512987      | 0.133769      | -0.067326       | 0.048664     |
| H4         | -1.425990     | 1.513007      | -0.133768     | -0.067315       | 0.048650     |

<sup>a</sup>Part of the Gaussian output file:

Zero-point correction= 0.013695 (Hartree/Particle)  
 Thermal correction to Energy= 0.017982  
 Thermal correction to Enthalpy= 0.018926  
 Thermal correction to Gibbs Free Energy= -0.017823  
 Sum of electronic and zero-point Energies= -239.865362  
 Sum of electronic and thermal Energies= -239.861075  
 Sum of electronic and thermal Enthalpies= -239.860131  
 Sum of electronic and thermal Free Energies= -239.896880

**Table S36.**

(A) Geometry optimized for  $[\text{Pt}_2\text{H}_3]^+$  (singlet) computed at the M06 level of DFT using SDD(Pt) and 6-31+G\*\*(H) basis sets in vacuo.<sup>a</sup>

| Atom Label | X in angstrom | Y in angstrom | Z in angstrom | Mulliken Charge |
|------------|---------------|---------------|---------------|-----------------|
| Pt1        | -1.301080     | -0.016624     | -0.004077     | 0.289815        |
| Pt2        | 1.289310      | 0.020464      | -0.013743     | 0.172941        |
| H3         | -1.167517     | 1.486967      | 0.128295      | 0.154561        |
| H4         | 1.165828      | -1.486960     | -0.171592     | 0.188501        |
| H5         | 0.919679      | -0.299498     | 1.433301      | 0.194182        |

<sup>a</sup>Part of the Gaussian output file:

SCF Done: E(RM06) = -240.170289993 A.U. after 9 cycles

|               |          |           |            |
|---------------|----------|-----------|------------|
| Item          | Value    | Threshold | Converged? |
| Maximum Force | 0.000005 | 0.000450  | YES        |
| RMS Force     | 0.000002 | 0.000300  | YES        |

|                |          |          |          |
|----------------|----------|----------|----------|
|                | 1        | 2        | 3        |
|                | A        | A        | A        |
| Frequencies -- | 162.2882 | 278.2278 | 352.7894 |
| Red. masses -- | 140.2332 | 1.0115   | 1.0145   |
| Frc consts --  | 2.1761   | 0.0461   | 0.0744   |
| IR Inten --    | 0.7037   | 2.4306   | 0.7758   |

Zero-point correction= 0.022742 (Hartree/Particle)  
 Thermal correction to Energy= 0.027410  
 Thermal correction to Enthalpy= 0.028354  
 Thermal correction to Gibbs Free Energy= -0.008026  
 Sum of electronic and zero-point Energies= -240.147548  
 Sum of electronic and thermal Energies= -240.142880  
 Sum of electronic and thermal Enthalpies= -240.141936  
 Sum of electronic and thermal Free Energies= -240.178316

(B) Summary for the DFT calculation of  $[\text{Pt}_2\text{H}_3]^+$  (singlet) with solvation in water taken into consideration (C-PCM), at the M06 level of DFT with SDD(Pt) and 6-31+G\*\*(H) basis sets. Computed by the single-point calculation for its optimized structure in vacuo.<sup>a</sup>

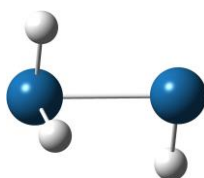

| Atom Label | X in angstrom | Y in angstrom | Z in angstrom | Mulliken Charge |
|------------|---------------|---------------|---------------|-----------------|
| Pt1        | 1.301080      | 0.016624      | -0.004077     | 0.310485        |
| Pt2        | -1.289311     | -0.020464     | -0.013743     | 0.525964        |
| H3         | 1.167517      | -1.486967     | 0.128295      | 0.015031        |
| H4         | -1.165828     | 1.486960      | -0.171592     | 0.071597        |

|    |           |          |          |          |
|----|-----------|----------|----------|----------|
| H5 | -0.919679 | 0.299498 | 1.433301 | 0.076922 |
|----|-----------|----------|----------|----------|

---

<sup>a</sup>Part of the Gaussian output file:

|                                              |                             |
|----------------------------------------------|-----------------------------|
| Zero-point correction=                       | 0.022623 (Hartree/Particle) |
| Thermal correction to Energy=                | 0.026771                    |
| Thermal correction to Enthalpy=              | 0.027715                    |
| Thermal correction to Gibbs Free Energy=     | -0.007807                   |
| Sum of electronic and zero-point Energies=   | -240.338865                 |
| Sum of electronic and thermal Energies=      | -240.334716                 |
| Sum of electronic and thermal Enthalpies=    | -240.333772                 |
| Sum of electronic and thermal Free Energies= | -240.369294                 |

**Table S37.**

(A) Geometry optimized for  $[\text{Pt}_2\text{H}_3]^+$  (triplet) computed at the M06 level of DFT using SDD(Pt) and 6-31+G\*\*(H) basis sets in vacuo.<sup>a</sup>

| Atom Label | X in angstrom | Y in angstrom | Z in angstrom | Mulliken Charge | Spin Density |
|------------|---------------|---------------|---------------|-----------------|--------------|
| Pt1        | -1.346786     | -0.022848     | 0.000026      | 0.367918        | 1.337671     |
| Pt2        | 1.332084      | 0.033077      | 0.000048      | 0.162005        | 0.468098     |
| H3         | -1.723994     | 1.485015      | -0.001184     | 0.131177        | 0.119958     |
| H4         | 1.436547      | -1.143254     | 0.971418      | 0.169445        | 0.037191     |
| H5         | 1.434238      | -1.139579     | -0.976024     | 0.169455        | 0.037083     |

<sup>a</sup>Part of the Gaussian output file:

SCF Done: E(UM06) = -240.135240026 A.U. after 20 cycles

Annihilation of the first spin contaminant:

S\*\*2 before annihilation 2.0056, after 2.0000

| Item          | Value    | Threshold | Converged? |
|---------------|----------|-----------|------------|
| Maximum Force | 0.000027 | 0.000450  | YES        |
| RMS Force     | 0.000014 | 0.000300  | YES        |

|                | 1        | 2        | 3        |
|----------------|----------|----------|----------|
|                | A        | A        | A        |
| Frequencies -- | 131.3499 | 237.9701 | 322.0693 |
| Red. masses -- | 158.2149 | 1.0119   | 1.0159   |
| Frc consts --  | 1.6083   | 0.0338   | 0.0621   |
| IR Inten --    | 0.0632   | 4.3474   | 31.2413  |

Zero-point correction= 0.021276 (Hartree/Particle)  
 Thermal correction to Energy= 0.026338  
 Thermal correction to Enthalpy= 0.027282  
 Thermal correction to Gibbs Free Energy= -0.011003  
 Sum of electronic and zero-point Energies= -240.113964  
 Sum of electronic and thermal Energies= -240.108902  
 Sum of electronic and thermal Enthalpies= -240.107958  
 Sum of electronic and thermal Free Energies= -240.146243

(B) Summary for the DFT calculation of  $[\text{Pt}_2\text{H}_3]^+$  (triplet) with solvation in water taken into consideration (C-PCM), at the M06 level of DFT with SDD(Pt) and 6-31+G\*\*(H) basis sets. Computed by the single-point calculation for its optimized structure in vacuo.<sup>a</sup>

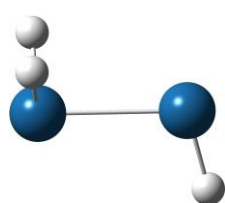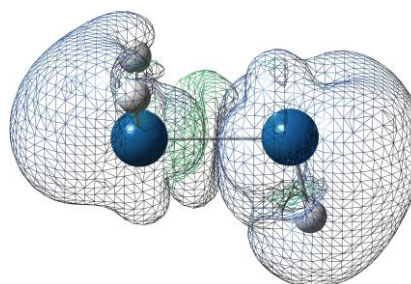

Spin density distribution

| Atom Label | X in angstrom | Y in angstrom | Z in angstrom | Mulliken Charge | Spin Density |
|------------|---------------|---------------|---------------|-----------------|--------------|
| Pt1        | 1.346786      | -0.022848     | -0.000026     | 0.530516        | 1.425639     |
| Pt2        | -1.332084     | 0.033077      | -0.000048     | 0.456583        | 0.461043     |
| H3         | 1.723994      | 1.485015      | 0.001184      | -0.053646       | 0.074825     |
| H4         | -1.436547     | -1.143254     | -0.971418     | 0.033249        | 0.019289     |
| H5         | -1.434238     | -1.139579     | 0.976024      | 0.033299        | 0.019205     |

<sup>a</sup>Part of the Gaussian output file:

Zero-point correction= 0.021539 (Hartree/Particle)  
 Thermal correction to Energy= 0.025792  
 Thermal correction to Enthalpy= 0.026736  
 Thermal correction to Gibbs Free Energy= -0.010019  
 Sum of electronic and zero-point Energies= -240.313971  
 Sum of electronic and thermal Energies= -240.309717  
 Sum of electronic and thermal Enthalpies= -240.308773  
 Sum of electronic and thermal Free Energies= -240.345529

**Table S38.**

(A) Geometry optimized for  $[\text{Pt}_2\text{H}_2]^-$  (doublet) computed at the M06 level of DFT using SDD(Pt) and 6-31+G\*\*(H) basis sets in vacuo.<sup>a</sup>

| Atom Label | X in angstrom | Y in angstrom | Z in angstrom | Mulliken Charge | Spin Density |
|------------|---------------|---------------|---------------|-----------------|--------------|
| Pt1        | -1.285131     | -0.024095     | -0.008101     | -0.454178       | 0.470148     |
| Pt2        | 1.285131      | 0.024095      | -0.008101     | -0.454178       | 0.470147     |
| H3         | -2.080438     | 1.160945      | 0.631896      | -0.045822       | 0.029852     |
| H4         | 2.080437      | -1.160943     | 0.631902      | -0.045822       | 0.029852     |

<sup>a</sup>Part of the Gaussian output file:

SCF Done: E(UM06) = -239.939660900 A.U. after 15 cycles

Annihilation of the first spin contaminant:

S\*\*2 before annihilation 0.7568, after 0.7500

| Item          | Value    | Threshold | Converged? |
|---------------|----------|-----------|------------|
| Maximum Force | 0.000015 | 0.000450  | YES        |
| RMS Force     | 0.000012 | 0.000300  | YES        |

|                | 1        | 2        | 3        |
|----------------|----------|----------|----------|
|                | A        | A        | A        |
| Frequencies -- | 151.1778 | 308.7638 | 374.4260 |
| Red. masses -- | 157.3315 | 1.0179   | 1.0160   |
| Frc consts --  | 2.1186   | 0.0572   | 0.0839   |
| IR Inten --    | 0.1565   | 8.9129   | 221.7697 |

Zero-point correction= 0.012535 (Hartree/Particle)

Thermal correction to Energy= 0.017000

Thermal correction to Enthalpy= 0.017944

Thermal correction to Gibbs Free Energy= -0.018531

Sum of electronic and zero-point Energies= -239.927126

Sum of electronic and thermal Energies= -239.922661

Sum of electronic and thermal Enthalpies= -239.921717

Sum of electronic and thermal Free Energies= -239.958191

(B) Summary for the DFT calculation of  $[\text{Pt}_2\text{H}_2]^-$  (doublet) with solvation in water taken into consideration (C-PCM), at the M06 level of DFT with SDD(Pt) and 6-31+G\*\*(H) basis sets. Computed by the single-point calculation for its optimized structure in vacuo.<sup>a</sup>

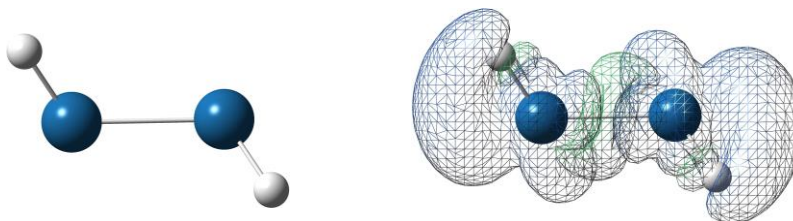

Spin density distribution



| Atom Label | X in angstrom | Y in angstrom | Z in angstrom | Mulliken Charge | Spin Density |
|------------|---------------|---------------|---------------|-----------------|--------------|
| Pt1        | -1.285131     | -0.024095     | -0.008101     | -0.396568       | 0.477811     |
| Pt2        | 1.285131      | 0.024095      | -0.008101     | -0.396568       | 0.477811     |
| H3         | -2.080438     | 1.160945      | 0.631896      | -0.103432       | 0.022189     |
| H4         | 2.080437      | -1.160943     | 0.631902      | -0.103432       | 0.022189     |

<sup>a</sup>Part of the Gaussian output file:

Zero-point correction= 0.011009 (Hartree/Particle)  
 Thermal correction to Energy= 0.015524  
 Thermal correction to Enthalpy= 0.016468  
 Thermal correction to Gibbs Free Energy= -0.020592  
 Sum of electronic and zero-point Energies= -240.008116  
 Sum of electronic and thermal Energies= -240.003601  
 Sum of electronic and thermal Enthalpies= -240.002657  
 Sum of electronic and thermal Free Energies= -240.039716

**Table S39.**

(A) Geometry optimized for  $[\text{Pt}_2\text{H}_3]$  (doublet) computed at the M06 level of DFT using SDD(Pt) and 6-31+G\*\*(H) basis sets in vacuo.<sup>a</sup>

| Atom Label | X in angstrom | Y in angstrom | Z in angstrom | Mulliken Charge | Spin Density |
|------------|---------------|---------------|---------------|-----------------|--------------|
| Pt1        | -1.348904     | 0.023101      | -0.011037     | -0.097098       | 0.438203     |
| Pt2        | 1.348904      | -0.023101     | -0.011067     | -0.097098       | 0.438204     |
| H3         | -1.686081     | -1.441552     | 0.338297      | 0.050320        | 0.072634     |
| H4         | 1.686105      | 1.441548      | 0.338260      | 0.050319        | 0.072635     |
| H5         | 0.000014      | 0.000005      | 1.047580      | 0.093557        | -0.021676    |

<sup>a</sup>Part of the Gaussian output file:

SCF Done: E(UM06) = -240.452690069 A.U. after 11 cycles  
 Annihilation of the first spin contaminant:  
 S\*\*2 before annihilation 0.7567, after 0.7500

| Item          | Value    | Threshold | Converged? |
|---------------|----------|-----------|------------|
| Maximum Force | 0.000015 | 0.000450  | YES        |
| RMS Force     | 0.000008 | 0.000300  | YES        |

|                | 1        | 2        | 3        |
|----------------|----------|----------|----------|
|                | A        | A        | A        |
| Frequencies -- | 124.1834 | 255.5022 | 319.4248 |
| Red. masses -- | 91.2798  | 1.0122   | 1.0153   |
| Frc consts --  | 0.8294   | 0.0389   | 0.0610   |
| IR Inten --    | 0.0413   | 42.0979  | 15.2640  |

Zero-point correction= 0.020135 (Hartree/Particle)  
 Thermal correction to Energy= 0.024934  
 Thermal correction to Enthalpy= 0.025878  
 Thermal correction to Gibbs Free Energy= -0.011537  
 Sum of electronic and zero-point Energies= -240.432556  
 Sum of electronic and thermal Energies= -240.427756  
 Sum of electronic and thermal Enthalpies= -240.426812  
 Sum of electronic and thermal Free Energies= -240.464227

(B) Summary for the DFT calculation of  $[\text{Pt}_2\text{H}_3]$  (doublet) with solvation in water taken into consideration (C-PCM), at the M06 level of DFT with SDD(Pt) and 6-31+G\*\*(H) basis sets. Computed by the single-point calculation for its optimized structure in vacuo.<sup>a</sup>

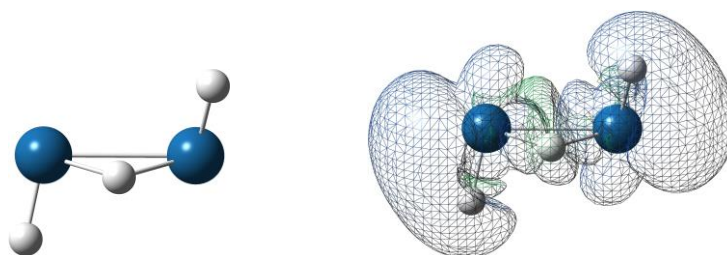

Spin density distribution

| Atom Label | X in angstrom | Y in angstrom | Z in angstrom | Mulliken Charge | Spin Density |
|------------|---------------|---------------|---------------|-----------------|--------------|
| Pt1        | 1.348904      | -0.023101     | -0.011037     | 0.037893        | 0.463017     |
| Pt2        | -1.348904     | 0.023101      | -0.011067     | 0.037892        | 0.463017     |
| H3         | 1.686081      | 1.441552      | 0.338297      | -0.048348       | 0.048130     |
| H4         | -1.686105     | -1.441548     | 0.338260      | -0.048348       | 0.048131     |
| H5         | -0.000014     | -0.000005     | 1.047580      | 0.020911        | -0.022294    |

<sup>a</sup>Part of the Gaussian output file:

Zero-point correction= 0.019228 (Hartree/Particle)  
 Thermal correction to Energy= 0.024356  
 Thermal correction to Enthalpy= 0.025300  
 Thermal correction to Gibbs Free Energy= -0.013035  
 Sum of electronic and zero-point Energies= -240.479437  
 Sum of electronic and thermal Energies= -240.474309  
 Sum of electronic and thermal Enthalpies= -240.473364  
 Sum of electronic and thermal Free Energies= -240.511700

**Table S40.**

(A) Geometry optimized for  $[\text{Pt}_2\text{H}_4]^+$  (doublet) computed at the M06 level of DFT using SDD(Pt) and 6-31+G\*\*(H) basis sets in vacuo.<sup>a</sup>

| Atom Label | X in angstrom | Y in angstrom | Z in angstrom | Mulliken Charge | Spin Density |
|------------|---------------|---------------|---------------|-----------------|--------------|
| Pt1        | 1.342138      | 0.031591      | 0.002330      | 0.170860        | 0.424054     |
| Pt2        | -1.342202     | -0.031595     | 0.002356      | 0.170130        | 0.423425     |
| H3         | -1.432718     | 1.052254      | -1.071875     | 0.165349        | 0.036503     |
| H4         | -1.490126     | 1.206094      | 0.888628      | 0.164157        | 0.039700     |
| H5         | 1.493460      | -1.205328     | 0.889127      | 0.164158        | 0.039786     |
| H6         | 1.434328      | -1.052718     | -1.071387     | 0.165346        | 0.036532     |

<sup>a</sup>Part of the Gaussian output file:

SCF Done: E(UM06) = -240.769095492 A.U. after 12 cycles

Annihilation of the first spin contaminant:

S\*\*2 before annihilation 0.7542, after 0.7500

| Item          | Value    | Threshold | Converged? |
|---------------|----------|-----------|------------|
| Maximum Force | 0.000094 | 0.000450  | YES        |
| RMS Force     | 0.000044 | 0.000300  | YES        |

|                | 1        | 2        | 3        |
|----------------|----------|----------|----------|
|                | A        | A        | A        |
| Frequencies -- | 130.6384 | 248.0115 | 330.1053 |
| Red. masses -- | 130.7612 | 1.0141   | 1.0179   |
| Frc consts --  | 1.3148   | 0.0368   | 0.0653   |
| IR Inten --    | 0.0090   | 2.6921   | 27.5614  |

Zero-point correction= 0.029508 (Hartree/Particle)  
 Thermal correction to Energy= 0.034965  
 Thermal correction to Enthalpy= 0.035909  
 Thermal correction to Gibbs Free Energy= -0.002713  
 Sum of electronic and zero-point Energies= -240.739587  
 Sum of electronic and thermal Energies= -240.734130  
 Sum of electronic and thermal Enthalpies= -240.733186  
 Sum of electronic and thermal Free Energies= -240.771808

(B) Summary for the DFT calculation of  $[\text{Pt}_2\text{H}_4]^+$  (doublet) with solvation in water taken into consideration (C-PCM), at the M06 level of DFT with SDD(Pt) and 6-31+G\*\*(H) basis sets. Computed by the single-point calculation for its optimized structure in vacuo.<sup>a</sup>

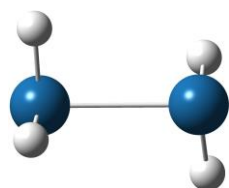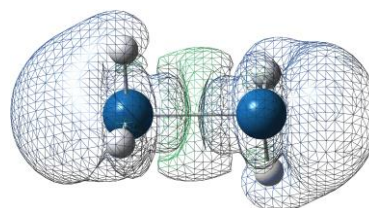

Spin density distribution

| Atom Label | X in angstrom | Y in angstrom | Z in angstrom | Mulliken Charge | Spin Density |
|------------|---------------|---------------|---------------|-----------------|--------------|
| Pt1        | -1.342138     | 0.031591      | -0.002330     | 0.436925        | 0.453702     |
| Pt2        | 1.342202      | -0.031595     | -0.002356     | 0.436901        | 0.453461     |
| H3         | 1.432718      | 1.052254      | 1.071875      | 0.033029        | 0.022147     |
| H4         | 1.490127      | 1.206094      | -0.888628     | 0.030093        | 0.024256     |
| H5         | -1.493460     | -1.205328     | -0.889127     | 0.030038        | 0.024291     |
| H6         | -1.434328     | -1.052718     | 1.071387      | 0.033014        | 0.022143     |

<sup>a</sup>Part of the Gaussian output file:

Zero-point correction= 0.030597 (Hartree/Particle)  
 Thermal correction to Energy= 0.035742  
 Thermal correction to Enthalpy= 0.036686  
 Thermal correction to Gibbs Free Energy= -0.001285  
 Sum of electronic and zero-point Energies= -240.933150  
 Sum of electronic and thermal Energies= -240.928005  
 Sum of electronic and thermal Enthalpies= -240.927061  
 Sum of electronic and thermal Free Energies= -240.965032

**Table S41.**

(A) Geometry optimized for  $[\text{Pt}_2\text{H}_3]^-$  (singlet) computed at the M06 level of DFT using SDD(Pt) and 6-31+G\*\*(H) basis sets in vacuo.<sup>a</sup>

| Atom Label | X in angstrom | Y in angstrom | Z in angstrom | Mulliken Charge |
|------------|---------------|---------------|---------------|-----------------|
| Pt1        | 1.347138      | 0.022422      | -0.000045     | -0.471261       |
| Pt2        | -1.300790     | -0.007139     | 0.000012      | -0.476382       |
| H3         | 1.519657      | -1.502503     | 0.003034      | -0.017348       |
| H4         | -2.567541     | 0.152584      | -0.895211     | -0.017510       |
| H5         | -2.567240     | 0.157851      | 0.894767      | -0.017499       |

<sup>a</sup>Part of the Gaussian output file:

SCF Done: E(RM06) = -240.555412636 A.U. after 10 cycles

|               |          |           |            |
|---------------|----------|-----------|------------|
| Item          | Value    | Threshold | Converged? |
| Maximum Force | 0.000026 | 0.000450  | YES        |
| RMS Force     | 0.000013 | 0.000300  | YES        |

|                |          |          |          |
|----------------|----------|----------|----------|
|                | 1        | 2        | 3        |
|                | A        | A        | A        |
| Frequencies -- | 134.8871 | 257.3980 | 289.9574 |
| Red. masses -- | 78.8338  | 1.0181   | 1.0216   |
| Frc consts --  | 0.8451   | 0.0397   | 0.0506   |
| IR Inten --    | 1.2963   | 3.3095   | 4.3159   |

Zero-point correction= 0.020196 (Hartree/Particle)  
 Thermal correction to Energy= 0.025286  
 Thermal correction to Enthalpy= 0.026230  
 Thermal correction to Gibbs Free Energy= -0.010784  
 Sum of electronic and zero-point Energies= -240.535216  
 Sum of electronic and thermal Energies= -240.530127  
 Sum of electronic and thermal Enthalpies= -240.529182  
 Sum of electronic and thermal Free Energies= -240.566196

(B) Summary for the DFT calculation of  $[\text{Pt}_2\text{H}_3]^-$  (singlet) with solvation in water taken into consideration (C-PCM), at the M06 level of DFT with SDD(Pt) and 6-31+G\*\*(H) basis sets. Computed by the single-point calculation for its optimized structure in vacuo.<sup>a</sup>

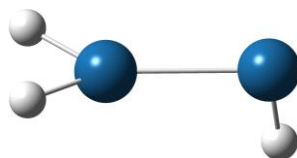

| Atom Label | X in angstrom | Y in angstrom | Z in angstrom | Mulliken Charge |
|------------|---------------|---------------|---------------|-----------------|
| Pt1        | 1.347138      | -0.022422     | 0.000045      | -0.342541       |
| Pt2        | -1.300790     | 0.007139      | -0.000012     | -0.496276       |
| H3         | 1.519658      | 1.502503      | -0.003034     | -0.087981       |
| H4         | -2.567541     | -0.152584     | 0.895211      | -0.036608       |

|    |           |           |           |           |
|----|-----------|-----------|-----------|-----------|
| H5 | -2.567240 | -0.157851 | -0.894767 | -0.036593 |
|----|-----------|-----------|-----------|-----------|

---

<sup>a</sup>Part of the Gaussian output file:

|                                              |                             |
|----------------------------------------------|-----------------------------|
| Zero-point correction=                       | 0.019568 (Hartree/Particle) |
| Thermal correction to Energy=                | 0.024254                    |
| Thermal correction to Enthalpy=              | 0.025198                    |
| Thermal correction to Gibbs Free Energy=     | -0.011069                   |
| Sum of electronic and zero-point Energies=   | -240.622306                 |
| Sum of electronic and thermal Energies=      | -240.617620                 |
| Sum of electronic and thermal Enthalpies=    | -240.616676                 |
| Sum of electronic and thermal Free Energies= | -240.652944                 |

**Table S42.**

(A) Geometry optimized for [Pt<sub>2</sub>H<sub>4</sub>] (singlet) computed at the M06 level of DFT using SDD(Pt) and 6-31+G\*\*(H) basis sets in vacuo.<sup>a</sup>

| Atom Label | X in angstrom | Y in angstrom | Z in angstrom | Mulliken Charge |
|------------|---------------|---------------|---------------|-----------------|
| Pt1        | -1.425914     | 0.000105      | -0.000978     | 0.044652        |
| Pt2        | 1.368390      | 0.010847      | -0.017088     | -0.286577       |
| H3         | 2.003959      | -0.720741     | 1.171123      | 0.086191        |
| H4         | 2.938982      | 0.088269      | -0.180291     | 0.004749        |
| H5         | -0.234470     | 0.801734      | 0.713679      | 0.074957        |
| H6         | -0.221637     | -1.023491     | -0.295337     | 0.076028        |

<sup>a</sup>Part of the Gaussian output file:

SCF Done: E(RM06) = -241.067710043 A.U. after 9 cycles

| Item          | Value    | Threshold | Converged? |
|---------------|----------|-----------|------------|
| Maximum Force | 0.000016 | 0.000450  | YES        |
| RMS Force     | 0.000009 | 0.000300  | YES        |

|                | 1        | 2        | 3        |
|----------------|----------|----------|----------|
|                | A        | A        | A        |
| Frequencies -- | 116.2221 | 163.4490 | 232.7914 |
| Red. masses -- | 4.4924   | 1.2083   | 1.0735   |
| Frc consts --  | 0.0358   | 0.0190   | 0.0343   |
| IR Inten --    | 0.0846   | 2.6343   | 3.7245   |

Zero-point correction= 0.026754 (Hartree/Particle)  
 Thermal correction to Energy= 0.032419  
 Thermal correction to Enthalpy= 0.033363  
 Thermal correction to Gibbs Free Energy= -0.004996  
 Sum of electronic and zero-point Energies= -241.040956  
 Sum of electronic and thermal Energies= -241.035291  
 Sum of electronic and thermal Enthalpies= -241.034347  
 Sum of electronic and thermal Free Energies= -241.072706

(B) Summary for the DFT calculation of [Pt<sub>2</sub>H<sub>4</sub>] (singlet) with solvation in water taken into consideration (C-PCM), at the M06 level of DFT with SDD(Pt) and 6-31+G\*\*(H) basis sets. Computed by the single-point calculation for its optimized structure in vacuo.<sup>a</sup>

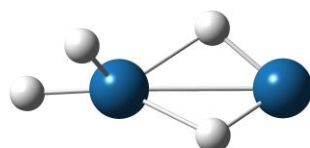

| Atom Label | X in angstrom | Y in angstrom | Z in angstrom | Mulliken Charge |
|------------|---------------|---------------|---------------|-----------------|
| Pt1        | 1.425914      | -0.000105     | -0.000978     | 0.276169        |
| Pt2        | -1.368390     | -0.010847     | -0.017088     | -0.243578       |
| H3         | -2.003959     | 0.720741      | 1.171123      | 0.029571        |
| H4         | -2.938982     | -0.088269     | -0.180291     | -0.061469       |



|    |          |           |           |           |
|----|----------|-----------|-----------|-----------|
| H5 | 0.234470 | -0.801734 | 0.713680  | -0.000863 |
| H6 | 0.221637 | 1.023491  | -0.295337 | 0.000170  |

---

<sup>a</sup>Part of the Gaussian output file:

|                                              |                             |
|----------------------------------------------|-----------------------------|
| Zero-point correction=                       | 0.025863 (Hartree/Particle) |
| Thermal correction to Energy=                | 0.030497                    |
| Thermal correction to Enthalpy=              | 0.031441                    |
| Thermal correction to Gibbs Free Energy=     | -0.004978                   |
| Sum of electronic and zero-point Energies=   | -241.091094                 |
| Sum of electronic and thermal Energies=      | -241.086460                 |
| Sum of electronic and thermal Enthalpies=    | -241.085515                 |
| Sum of electronic and thermal Free Energies= | -241.121935                 |

**Table S43.**

(A) Geometry optimized for  $[\text{Pt}_2\text{H}_5]^+$  (singlet) computed at the M06 level of DFT using SDD(Pt) and 6-31+G\*\*(H) basis sets in vacuo.<sup>a</sup>

| Atom Label | X in angstrom | Y in angstrom | Z in angstrom | Mulliken Charge |
|------------|---------------|---------------|---------------|-----------------|
| Pt1        | -1.383864     | 0.023024      | -0.013151     | 0.070125        |
| Pt2        | 1.324515      | -0.018078     | -0.005083     | 0.076203        |
| H3         | -1.189221     | -1.473730     | -0.226816     | 0.157528        |
| H4         | 2.656956      | -0.172813     | 0.764264      | 0.169462        |
| H5         | 1.585599      | 1.445878      | 0.303709      | 0.192136        |
| H6         | 2.605558      | 0.158507      | -0.846678     | 0.175640        |
| H7         | -1.029741     | -0.343654     | 1.427781      | 0.158905        |

<sup>a</sup>Part of the Gaussian output file:

SCF Done: E(RM06) = -241.379934781 A.U. after 9 cycles

| Item          | Value    | Threshold | Converged? |
|---------------|----------|-----------|------------|
| Maximum Force | 0.000005 | 0.000450  | YES        |
| RMS Force     | 0.000002 | 0.000300  | YES        |

|                | 1       | 2        | 3        |
|----------------|---------|----------|----------|
|                | A       | A        | A        |
| Frequencies -- | 59.7068 | 131.4257 | 149.6052 |
| Red. masses -- | 1.0314  | 24.6469  | 1.0304   |
| Frc consts --  | 0.0022  | 0.2508   | 0.0136   |
| IR Inten --    | 1.8650  | 3.4775   | 2.5034   |

Zero-point correction= 0.036874 (Hartree/Particle)  
 Thermal correction to Energy= 0.043323  
 Thermal correction to Enthalpy= 0.044267  
 Thermal correction to Gibbs Free Energy= 0.003704  
 Sum of electronic and zero-point Energies= -241.343061  
 Sum of electronic and thermal Energies= -241.336612  
 Sum of electronic and thermal Enthalpies= -241.335668  
 Sum of electronic and thermal Free Energies= -241.376231

(B) Summary for the DFT calculation of  $[\text{Pt}_2\text{H}_5]^+$  (singlet) with solvation in water taken into consideration (C-PCM), at the M06 level of DFT with SDD(Pt) and 6-31+G\*\*(H) basis sets. Computed by the single-point calculation for its optimized structure in vacuo.<sup>a</sup>

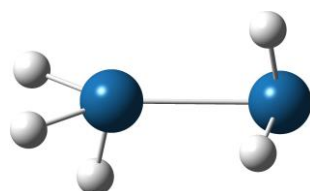

| Atom Label | X in angstrom | Y in angstrom | Z in angstrom | Mulliken Charge |
|------------|---------------|---------------|---------------|-----------------|
| Pt1        | 1.383864      | -0.023024     | -0.013151     | 0.290005        |
| Pt2        | -1.324516     | 0.018078      | -0.005083     | 0.382161        |

|    |           |           |           |          |
|----|-----------|-----------|-----------|----------|
| H3 | 1.189221  | 1.473730  | -0.226816 | 0.037334 |
| H4 | -2.656956 | 0.172813  | 0.764264  | 0.076948 |
| H5 | -1.585599 | -1.445878 | 0.303709  | 0.094809 |
| H6 | -2.605558 | -0.158507 | -0.846678 | 0.083661 |
| H7 | 1.029741  | 0.343654  | 1.427781  | 0.035082 |

-----  
<sup>a</sup>Part of the Gaussian output file:

Zero-point correction= 0.035199 (Hartree/Particle)  
Thermal correction to Energy= 0.039975  
Thermal correction to Enthalpy= 0.040919  
Thermal correction to Gibbs Free Energy= 0.004020  
Sum of electronic and zero-point Energies= -241.522869  
Sum of electronic and thermal Energies= -241.518092  
Sum of electronic and thermal Enthalpies= -241.517148  
Sum of electronic and thermal Free Energies= -241.554048

**Table S44.** (A) Geometry optimized for [Pt<sub>3</sub>] (singlet) computed at the M06 level of DFT using SDD(Pt) basis set in vacuo.<sup>a</sup>

| Atom Label | X in angstrom | Y in angstrom | Z in angstrom | Mulliken Charge |
|------------|---------------|---------------|---------------|-----------------|
| Pt1        | 0.000000      | 0.000000      | 1.465265      | 0.000042        |
| Pt2        | 0.000000      | 1.269029      | -0.732632     | -0.000021       |
| Pt3        | 0.000000      | -1.269029     | -0.732632     | -0.000021       |

<sup>a</sup>Part of the Gaussian output file:

SCF Done: E(RM06) = -358.022287090 A.U. after 12 cycles

| Item          | Value    | Threshold | Converged? |
|---------------|----------|-----------|------------|
| Maximum Force | 0.000009 | 0.000450  | YES        |
| RMS Force     | 0.000008 | 0.000300  | YES        |

|                | 1        | 2        | 3        |
|----------------|----------|----------|----------|
|                | B2       | A1       | A1       |
| Frequencies -- | 135.1878 | 135.9220 | 216.6090 |
| Red. masses -- | 194.9648 | 194.9648 | 194.9648 |
| Frc consts --  | 2.0993   | 2.1222   | 5.3896   |
| IR Inten --    | 0.0179   | 0.0171   | 0.0000   |

Zero-point correction= 0.001111 (Hartree/Particle)  
 Thermal correction to Energy= 0.005816  
 Thermal correction to Enthalpy= 0.006761  
 Thermal correction to Gibbs Free Energy= -0.032587  
 Sum of electronic and zero-point Energies= -358.021176  
 Sum of electronic and thermal Energies= -358.016471  
 Sum of electronic and thermal Enthalpies= -358.015526  
 Sum of electronic and thermal Free Energies= -358.054874

(B) Summary for the DFT calculation of [Pt<sub>3</sub>] (singlet) with solvation in water taken into consideration (C-PCM), at the M06 level of DFT with SDD(Pt) basis set. Computed by the single-point calculation for its optimized structure in vacuo.<sup>a</sup>

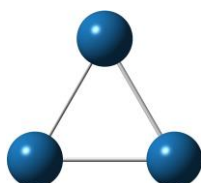

| Atom Label | X in angstrom | Y in angstrom | Z in angstrom | Mulliken Charge |
|------------|---------------|---------------|---------------|-----------------|
| Pt1        | 0.000000      | 0.000000      | 1.465265      | 0.013892        |
| Pt2        | 0.000000      | 1.269029      | -0.732632     | -0.006946       |
| Pt3        | 0.000000      | -1.269029     | -0.732632     | -0.006946       |

<sup>a</sup>Part of the Gaussian output file:

|                                              |                             |
|----------------------------------------------|-----------------------------|
| Zero-point correction=                       | 0.000935 (Hartree/Particle) |
| Thermal correction to Energy=                | 0.005783                    |
| Thermal correction to Enthalpy=              | 0.006727                    |
| Thermal correction to Gibbs Free Energy=     | -0.033287                   |
| Sum of electronic and zero-point Energies=   | -358.063675                 |
| Sum of electronic and thermal Energies=      | -358.058827                 |
| Sum of electronic and thermal Enthalpies=    | -358.057883                 |
| Sum of electronic and thermal Free Energies= | -358.097897                 |

**Table S45.**

(A) Geometry optimized for  $[\text{Pt}_3\text{H}]^+$  (singlet) computed at the M06 level of DFT using SDD(Pt) and 6-31+G\*\*(H) basis sets in vacuo.<sup>a</sup>

| Atom Label | X in angstrom | Y in angstrom | Z in angstrom | Mulliken Charge |
|------------|---------------|---------------|---------------|-----------------|
| Pt1        | 0.004835      | 1.472607      | 0.000000      | 0.452799        |
| Pt2        | 0.004835      | -0.730402     | 1.297123      | 0.186227        |
| Pt3        | 0.004835      | -0.730402     | -1.297123     | 0.186227        |
| H4         | -1.131430     | -0.920585     | 0.000000      | 0.174746        |

<sup>a</sup>Part of the Gaussian output file:

SCF Done: E(UM06) = -358.334744238 A.U. after 15 cycles

| Item          | Value    | Threshold | Converged? |
|---------------|----------|-----------|------------|
| Maximum Force | 0.000027 | 0.000450  | YES        |
| RMS Force     | 0.000017 | 0.000300  | YES        |

|                | 1        | 2        | 3        |
|----------------|----------|----------|----------|
|                | A''      | A'       | A'       |
| Frequencies -- | 123.3697 | 132.7000 | 205.8472 |
| Red. masses -- | 92.3183  | 35.1823  | 153.9849 |
| Frc consts --  | 0.8279   | 0.3650   | 3.8443   |
| IR Inten --    | 0.0486   | 0.0510   | 0.1395   |

|                                              |                             |
|----------------------------------------------|-----------------------------|
| Zero-point correction=                       | 0.006770 (Hartree/Particle) |
| Thermal correction to Energy=                | 0.012031                    |
| Thermal correction to Enthalpy=              | 0.012975                    |
| Thermal correction to Gibbs Free Energy=     | -0.027973                   |
| Sum of electronic and zero-point Energies=   | -358.327975                 |
| Sum of electronic and thermal Energies=      | -358.322714                 |
| Sum of electronic and thermal Enthalpies=    | -358.321769                 |
| Sum of electronic and thermal Free Energies= | -358.362717                 |

(B) Summary for the DFT calculation of  $[\text{Pt}_3\text{H}]^+$  (singlet) with solvation in water taken into consideration (C-PCM), at the M06 level of DFT with SDD(Pt) and 6-31+G\*\*(H) basis sets. Computed by the single-point calculation for its optimized structure in vacuo.<sup>a</sup>

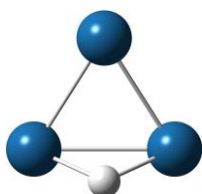

| Atom Label | X in angstrom | Y in angstrom | Z in angstrom | Mulliken Charge |
|------------|---------------|---------------|---------------|-----------------|
| Pt1        | 0.004835      | 1.472607      | 0.000000      | 0.403967        |
| Pt2        | 0.004835      | -0.730402     | 1.297123      | 0.264352        |
| Pt3        | 0.004835      | -0.730402     | -1.297123     | 0.264352        |
| H4         | -1.131430     | -0.920585     | 0.000000      | 0.067330        |

---

<sup>a</sup>Part of the Gaussian output file:

|                                              |                             |
|----------------------------------------------|-----------------------------|
| Zero-point correction=                       | 0.007927 (Hartree/Particle) |
| Thermal correction to Energy=                | 0.012811                    |
| Thermal correction to Enthalpy=              | 0.013756                    |
| Thermal correction to Gibbs Free Energy=     | -0.026374                   |
| Sum of electronic and zero-point Energies=   | -358.528137                 |
| Sum of electronic and thermal Energies=      | -358.523252                 |
| Sum of electronic and thermal Enthalpies=    | -358.522308                 |
| Sum of electronic and thermal Free Energies= | -358.562438                 |

**Table S46.**

(A) Geometry optimized for  $[\text{Pt}_3\text{H}_2]^{2+}$  (singlet) computed at the M06 level of DFT using SDD(Pt) and 6-31+G\*\*(H) basis sets in vacuo.<sup>a</sup>

| Atom Label | X in angstrom | Y in angstrom | Z in angstrom | Mulliken Charge |
|------------|---------------|---------------|---------------|-----------------|
| Pt1        | -1.500173     | 0.050926      | 0.000001      | 0.709185        |
| Pt2        | 0.699386      | -1.306022     | -0.016783     | 0.375927        |
| Pt3        | 0.787643      | 1.255536      | 0.016780      | 0.376989        |
| H4         | 0.473813      | -1.145789     | 1.485526      | 0.269007        |
| H5         | 0.551398      | 1.111447      | -1.485354     | 0.268893        |

aPart of the Gaussian output file:

SCF Done: E(RM06) = -358.438585159 A.U. after 19 cycles

| Item          | Value    | Threshold | Converged? |
|---------------|----------|-----------|------------|
| Maximum Force | 0.000033 | 0.000450  | YES        |
| RMS Force     | 0.000013 | 0.000300  | YES        |

|                | 1        | 2        | 3        |
|----------------|----------|----------|----------|
|                | A        | A        | A        |
| Frequencies -- | 99.0790  | 148.7613 | 188.1281 |
| Red. masses -- | 151.0925 | 146.1678 | 1.7528   |
| Frc consts --  | 0.8739   | 1.9058   | 0.0365   |
| IR Inten --    | 0.0326   | 0.2043   | 2.4526   |

Zero-point correction= 0.014963 (Hartree/Particle)  
 Thermal correction to Energy= 0.021177  
 Thermal correction to Enthalpy= 0.022121  
 Thermal correction to Gibbs Free Energy= -0.020623  
 Sum of electronic and zero-point Energies= -358.423622  
 Sum of electronic and thermal Energies= -358.417408  
 Sum of electronic and thermal Enthalpies= -358.416464  
 Sum of electronic and thermal Free Energies= -358.459208

(B) Summary for the DFT calculation of  $[\text{Pt}_3\text{H}_2]^{2+}$  (singlet) with solvation in water taken into consideration (C-PCM), at the M06 level of DFT with SDD(Pt) and 6-31+G\*\*(H) basis sets. Computed by the single-point calculation for its optimized structure in vacuo.<sup>a</sup>

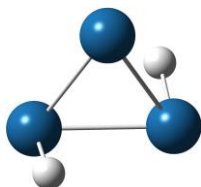

| Atom Label | X in angstrom | Y in angstrom | Z in angstrom | Mulliken Charge |
|------------|---------------|---------------|---------------|-----------------|
| Pt1        | 1.500173      | -0.050926     | 0.000001      | 0.651376        |
| Pt2        | -0.699386     | 1.306022      | -0.016783     | 0.586833        |
| Pt3        | -0.787643     | -1.255537     | 0.016780      | 0.584605        |
| H4         | -0.473813     | 1.145789      | 1.485526      | 0.088948        |



|    |           |           |           |          |
|----|-----------|-----------|-----------|----------|
| H5 | -0.551398 | -1.111447 | -1.485354 | 0.088239 |
|----|-----------|-----------|-----------|----------|

---

<sup>a</sup>Part of the Gaussian output file:

|                                              |                             |
|----------------------------------------------|-----------------------------|
| Zero-point correction=                       | 0.016675 (Hartree/Particle) |
| Thermal correction to Energy=                | 0.022506                    |
| Thermal correction to Enthalpy=              | 0.023450                    |
| Thermal correction to Gibbs Free Energy=     | -0.020756                   |
| Sum of electronic and zero-point Energies=   | -358.964771                 |
| Sum of electronic and thermal Energies=      | -358.958940                 |
| Sum of electronic and thermal Enthalpies=    | -358.957996                 |
| Sum of electronic and thermal Free Energies= | -359.002202                 |

**Table S47.**

(A) Geometry optimized for  $[\text{Pt}_3]^-$  (doublet) computed at the M06 level of DFT using SDD(Pt) basis set in vacuo.<sup>a</sup>

| Atom Label | X in angstrom | Y in angstrom | Z in angstrom | Mulliken Charge | Spin Density |
|------------|---------------|---------------|---------------|-----------------|--------------|
| Pt1        | 0.000000      | 0.000000      | 1.512940      | -0.333598       | 0.333403     |
| Pt2        | 0.000000      | 1.310659      | -0.756470     | -0.333201       | 0.333298     |
| Pt3        | 0.000000      | -1.310659     | -0.756470     | -0.333201       | 0.333298     |

<sup>a</sup>Part of the Gaussian output file:

SCF Done: E(UM06) = -358.108821796 A.U. after 18 cycles

Annihilation of the first spin contaminant:

S\*\*2 before annihilation 0.8011, after 0.7516

| Item          | Value    | Threshold | Converged? |
|---------------|----------|-----------|------------|
| Maximum Force | 0.000084 | 0.000450  | YES        |
| RMS Force     | 0.000055 | 0.000300  | YES        |

|                | 1        | 2        | 3        |
|----------------|----------|----------|----------|
|                | A1       | B2       | A1       |
| Frequencies -- | 116.4495 | 117.5342 | 182.2504 |
| Red. masses -- | 194.9648 | 194.9648 | 194.9648 |
| Frc consts --  | 1.5577   | 1.5868   | 3.8154   |
| IR Inten --    | 0.0055   | 0.0060   | 0.0000   |

Zero-point correction= 0.000948 (Hartree/Particle)  
 Thermal correction to Energy= 0.005775  
 Thermal correction to Enthalpy= 0.006719  
 Thermal correction to Gibbs Free Energy= -0.033794  
 Sum of electronic and zero-point Energies= -358.107874  
 Sum of electronic and thermal Energies= -358.103047  
 Sum of electronic and thermal Enthalpies= -358.102103  
 Sum of electronic and thermal Free Energies= -358.142616

(B) Summary for the DFT calculation of  $[\text{Pt}_3]^-$  (doublet) with solvation in water taken into consideration (C-PCM), at the M06 level of DFT with SDD(Pt) basis set. Computed by the single-point calculation for its optimized structure in vacuo.<sup>a</sup>

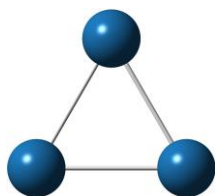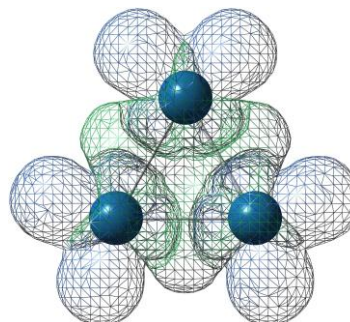

Spin density distribution

| Atom Label | X in angstrom | Y in angstrom | Z in angstrom | Mulliken Charge | Spin Density |
|------------|---------------|---------------|---------------|-----------------|--------------|
| Pt1        | 0.000000      | 0.000000      | 1.512940      | -0.342966       | 0.333347     |
| Pt2        | 0.000000      | 1.310659      | -0.756470     | -0.328517       | 0.333327     |
| Pt3        | 0.000000      | -1.310659     | -0.756470     | -0.328517       | 0.333327     |

<sup>a</sup>Part of the Gaussian output file:

Zero-point correction= 0.001018 (Hartree/Particle)  
 Thermal correction to Energy= 0.005796  
 Thermal correction to Enthalpy= 0.006740  
 Thermal correction to Gibbs Free Energy= -0.033631  
 Sum of electronic and zero-point Energies= -358.170482  
 Sum of electronic and thermal Energies= -358.165704  
 Sum of electronic and thermal Enthalpies= -358.164760  
 Sum of electronic and thermal Free Energies= -358.205130

**Table S48.**

(A) Geometry optimized for [Pt<sub>3</sub>H] (doublet) computed at the M06 level of DFT using SDD(Pt) and 6-31+G\*\*(H) basis sets in vacuo.<sup>a</sup>

| Atom Label | X in angstrom | Y in angstrom | Z in angstrom | Mulliken Charge | Spin Density |
|------------|---------------|---------------|---------------|-----------------|--------------|
| Pt1        | 1.333683      | 0.744415      | -0.007522     | -0.068518       | 0.295885     |
| Pt2        | -1.331904     | 0.747468      | -0.007517     | -0.068619       | 0.296279     |
| Pt3        | -0.001803     | -1.506235     | 0.002139      | 0.034710        | 0.418173     |
| H4         | 0.001868      | 1.119404      | 1.006184      | 0.102427        | -0.010337    |

<sup>a</sup>Part of the Gaussian output file:

SCF Done: E(UM06) = -358.628344916 A.U. after 17 cycles

Annihilation of the first spin contaminant:

S\*\*2 before annihilation 0.7766, after 0.7504

| Item          | Value    | Threshold | Converged? |
|---------------|----------|-----------|------------|
| Maximum Force | 0.000039 | 0.000450  | YES        |
| RMS Force     | 0.000021 | 0.000300  | YES        |

|                | 1        | 2        | 3        |
|----------------|----------|----------|----------|
|                | A        | A        | A        |
| Frequencies -- | 121.4088 | 121.7904 | 179.1907 |
| Red. masses -- | 81.4714  | 173.5041 | 87.4319  |
| Frc consts --  | 0.7075   | 1.5163   | 1.6541   |
| IR Inten --    | 0.0273   | 0.0166   | 0.0345   |

Zero-point correction= 0.007157 (Hartree/Particle)  
 Thermal correction to Energy= 0.012394  
 Thermal correction to Enthalpy= 0.013338  
 Thermal correction to Gibbs Free Energy= -0.028430  
 Sum of electronic and zero-point Energies= -358.621188  
 Sum of electronic and thermal Energies= -358.615951  
 Sum of electronic and thermal Enthalpies= -358.615007  
 Sum of electronic and thermal Free Energies= -358.656775

(B) Summary for the DFT calculation of [Pt<sub>3</sub>H] (doublet) with solvation in water taken into consideration (C-PCM), at the M06 level of DFT with SDD(Pt) and 6-31+G\*\*(H) basis sets. Computed by the single-point calculation for its optimized structure in vacuo.<sup>a</sup>

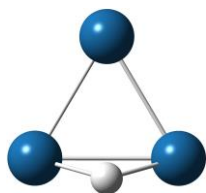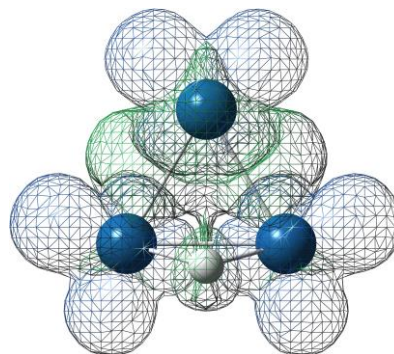

Spin density distribution

| Atom Label | X in angstrom | Y in angstrom | Z in angstrom | Mulliken Charge | Spin Density |
|------------|---------------|---------------|---------------|-----------------|--------------|
| Pt1        | -1.333683     | -0.744415     | -0.007522     | -0.002306       | 0.294242     |
| Pt2        | 1.331904      | -0.747468     | -0.007517     | -0.002722       | 0.294563     |
| Pt3        | 0.001803      | 1.506235      | 0.002139      | -0.016425       | 0.422391     |
| H4         | -0.001867     | -1.119404     | 1.006184      | 0.021452        | -0.011196    |

<sup>a</sup>Part of the Gaussian output file:

Zero-point correction= 0.007961 (Hartree/Particle)  
 Thermal correction to Energy= 0.012996  
 Thermal correction to Enthalpy= 0.013940  
 Thermal correction to Gibbs Free Energy= -0.027541  
 Sum of electronic and zero-point Energies= -358.664643  
 Sum of electronic and thermal Energies= -358.659607  
 Sum of electronic and thermal Enthalpies= -358.658663  
 Sum of electronic and thermal Free Energies= -358.700145

**Table S49.**

(A) Geometry optimized for  $[\text{Pt}_3\text{H}_2]^+$  (doublet) computed at the M06 level of DFT using SDD(Pt) and 6-31+G\*\*(H) basis sets in vacuo.<sup>a</sup>

| Atom Label | X in angstrom | Y in angstrom | Z in angstrom | Mulliken Charge | Spin Density |
|------------|---------------|---------------|---------------|-----------------|--------------|
| Pt1        | -1.339223     | 0.746045      | -0.006695     | 0.221818        | 0.405628     |
| Pt2        | 0.008249      | -1.503486     | 0.019413      | 0.228002        | 0.210962     |
| Pt3        | 1.330955      | 0.760152      | -0.006696     | 0.221579        | 0.405211     |
| H4         | 0.007285      | -1.311426     | -1.484545     | 0.185095        | -0.008656    |
| H5         | -0.005834     | 1.099988      | 1.014807      | 0.143505        | -0.013146    |

<sup>a</sup>Part of the Gaussian output file:

SCF Done: E(UM06) = -358.953915912 A.U. after 16 cycles

Annihilation of the first spin contaminant:

S\*\*2 before annihilation 0.7690, after 0.7502

| Item          | Value    | Threshold | Converged? |
|---------------|----------|-----------|------------|
| Maximum Force | 0.000099 | 0.000450  | YES        |
| RMS Force     | 0.000054 | 0.000300  | YES        |

|                | 1        | 2        | 3        |
|----------------|----------|----------|----------|
|                | A        | A        | A        |
| Frequencies -- | 122.6933 | 123.8674 | 181.7961 |
| Red. masses -- | 175.7266 | 105.7940 | 141.0728 |
| Frc consts --  | 1.5586   | 0.9564   | 2.7470   |
| IR Inten --    | 0.0365   | 0.0092   | 0.0878   |

Zero-point correction= 0.014822 (Hartree/Particle)  
 Thermal correction to Energy= 0.020536  
 Thermal correction to Enthalpy= 0.021480  
 Thermal correction to Gibbs Free Energy= -0.020944  
 Sum of electronic and zero-point Energies= -358.939094  
 Sum of electronic and thermal Energies= -358.933380  
 Sum of electronic and thermal Enthalpies= -358.932436  
 Sum of electronic and thermal Free Energies= -358.974859

(B) Summary for the DFT calculation of  $[\text{Pt}_3\text{H}_2]^+$  (doublet) with solvation in water taken into consideration (C-PCM), at the M06 level of DFT with SDD(Pt) and 6-31+G\*\*(H) basis sets. Computed by the single-point calculation for its optimized structure in vacuo.<sup>a</sup>

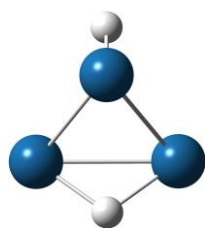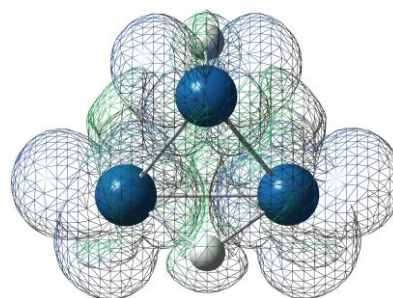

Spin density distribution

| Atom Label | X in angstrom | Y in angstrom | Z in angstrom | Mulliken Charge | Spin Density |
|------------|---------------|---------------|---------------|-----------------|--------------|
| Pt1        | -1.339223     | -0.746045     | 0.006695      | 0.262428        | 0.407747     |
| Pt2        | 0.008249      | 1.503486      | -0.019413     | 0.399360        | 0.205903     |
| Pt3        | 1.330955      | -0.760152     | 0.006696      | 0.261889        | 0.407117     |
| H4         | 0.007285      | 1.311427      | 1.484545      | 0.041542        | -0.007634    |
| H5         | -0.005834     | -1.099988     | -1.014807     | 0.034781        | -0.013133    |

<sup>a</sup>Part of the Gaussian output file:

Zero-point correction= 0.014179 (Hartree/Particle)  
 Thermal correction to Energy= 0.019680  
 Thermal correction to Enthalpy= 0.020624  
 Thermal correction to Gibbs Free Energy= -0.021778  
 Sum of electronic and zero-point Energies= -359.136463  
 Sum of electronic and thermal Energies= -359.130962  
 Sum of electronic and thermal Enthalpies= -359.130018  
 Sum of electronic and thermal Free Energies= -359.172420

**Table S50.**

(A) Geometry optimized for  $[\text{Pt}_3\text{H}]^-$  (triplet) computed at the M06 level of DFT using SDD(Pt) and 6-31+G\*\*(H) basis sets in vacuo.<sup>a</sup>

| Atom Label | X in angstrom | Y in angstrom | Z in angstrom | Mulliken Charge | Spin Density |
|------------|---------------|---------------|---------------|-----------------|--------------|
| Pt1        | -0.786694     | -1.293875     | 0.003421      | -0.293703       | 0.547110     |
| Pt2        | 1.537870      | -0.000656     | -0.020892     | -0.350290       | 0.819362     |
| Pt3        | -0.785439     | 1.294560      | 0.003433      | -0.293840       | 0.547368     |
| H4         | 2.672478      | -0.002243     | 1.094989      | -0.062167       | 0.086160     |

<sup>a</sup>Part of the Gaussian output file:

SCF Done: E(UM06) = -358.705447229 A.U. after 20 cycles

Annihilation of the first spin contaminant:

S\*\*2 before annihilation 2.0261, after 2.0003

| Item          | Value    | Threshold | Converged? |
|---------------|----------|-----------|------------|
| Maximum Force | 0.000083 | 0.000450  | YES        |
| RMS Force     | 0.000033 | 0.000300  | YES        |

|                | 1        | 2        | 3        |
|----------------|----------|----------|----------|
|                | A        | A        | A        |
| Frequencies -- | 100.5139 | 118.9367 | 178.9134 |
| Red. masses -- | 155.3180 | 147.2512 | 161.8191 |
| Frc consts --  | 0.9245   | 1.2273   | 3.0519   |
| IR Inten --    | 0.0808   | 0.1020   | 0.0070   |

Zero-point correction= 0.007911 (Hartree/Particle)

Thermal correction to Energy= 0.013220

Thermal correction to Enthalpy= 0.014164

Thermal correction to Gibbs Free Energy= -0.028182

Sum of electronic and zero-point Energies= -358.697536

Sum of electronic and thermal Energies= -358.692227

Sum of electronic and thermal Enthalpies= -358.691283

Sum of electronic and thermal Free Energies= -358.733630



(B) Summary for the DFT calculation of  $[\text{Pt}_3\text{H}]^-$  (triplet) with solvation in water taken into consideration (C-PCM), at the M06 level of DFT with SDD(Pt) and 6-31+G\*\*(H) basis sets. Computed by the single-point calculation for its optimized structure in vacuo.<sup>a</sup>

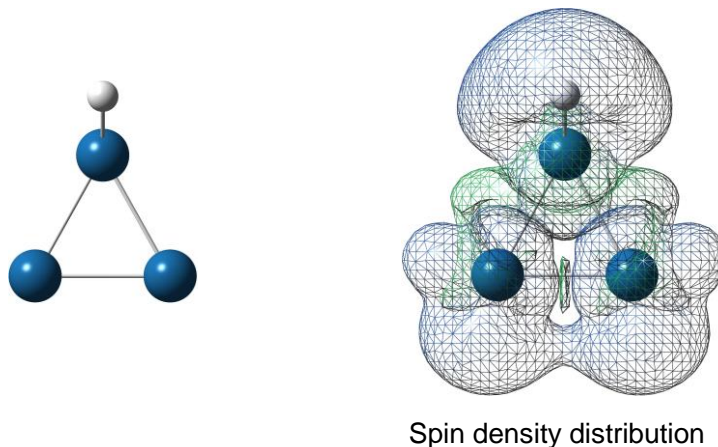

| Atom Label | X in angstrom | Y in angstrom | Z in angstrom | Mulliken Charge | Spin Density |
|------------|---------------|---------------|---------------|-----------------|--------------|
| Pt1        | -0.786694     | -1.293875     | 0.003421      | -0.187468       | 0.574760     |
| Pt2        | 1.537870      | -0.000656     | -0.020892     | -0.484836       | 0.768778     |
| Pt3        | -0.785439     | 1.294560      | 0.003433      | -0.187409       | 0.574944     |
| H4         | 2.672478      | -0.002243     | 1.094989      | -0.140287       | 0.081518     |

<sup>a</sup>Part of the Gaussian output file:

```

Zero-point correction=          0.006551 (Hartree/Particle)
Thermal correction to Energy=    0.011665
Thermal correction to Enthalpy=  0.012609
Thermal correction to Gibbs Free Energy= -0.029698
Sum of electronic and zero-point Energies= -358.767838
Sum of electronic and thermal Energies= -358.762724
Sum of electronic and thermal Enthalpies= -358.761780
Sum of electronic and thermal Free Energies= -358.804087
  
```

**Table S51.**

(A) Geometry optimized for [Pt<sub>3</sub>H<sub>2</sub>] (triplet) computed at the M06 level of DFT using SDD(Pt) and 6-31+G\*\*(H) basis sets in vacuo.<sup>a</sup>

| Atom Label | X in angstrom | Y in angstrom | Z in angstrom | Mulliken Charge | Spin Density |
|------------|---------------|---------------|---------------|-----------------|--------------|
| Pt1        | 0.002090      | -0.765408     | -1.322144     | -0.040272       | 0.515970     |
| Pt2        | 0.002090      | 1.520916      | 0.000000      | -0.012322       | 0.833445     |
| Pt3        | 0.002090      | -0.765408     | 1.322144      | -0.040272       | 0.515970     |
| H4         | -1.409325     | 2.190060      | 0.000000      | 0.028414        | 0.099207     |
| H5         | 0.920178      | -1.417855     | 0.000000      | 0.064453        | 0.035408     |

<sup>a</sup>Part of the Gaussian output file:

SCF Done: E(UM06) = -359.221878232 A.U. after 12 cycles

Annihilation of the first spin contaminant:

S\*\*2 before annihilation 2.0171, after 2.0001

| Item          | Value    | Threshold | Converged? |
|---------------|----------|-----------|------------|
| Maximum Force | 0.000012 | 0.000450  | YES        |
| RMS Force     | 0.000006 | 0.000300  | YES        |

|                | 1<br>A'' | 2<br>A'  | 3<br>A'  |
|----------------|----------|----------|----------|
| Frequencies -- | 114.1921 | 123.3901 | 175.9252 |
| Red. masses -- | 75.0186  | 107.4582 | 123.8172 |
| Frc consts --  | 0.5764   | 0.9639   | 2.2578   |
| IR Inten --    | 0.1733   | 0.0076   | 0.0242   |

Zero-point correction= 0.014300 (Hartree/Particle)

Thermal correction to Energy= 0.020071

Thermal correction to Enthalpy= 0.021016

Thermal correction to Gibbs Free Energy= -0.021980

Sum of electronic and zero-point Energies= -359.207579

Sum of electronic and thermal Energies= -359.201807

Sum of electronic and thermal Enthalpies= -359.200863

Sum of electronic and thermal Free Energies= -359.243858

(B) Summary for the DFT calculation of [Pt<sub>3</sub>H<sub>2</sub>] (triplet) with solvation in water taken into consideration (C-PCM), at the M06 level of DFT with SDD(Pt) and 6-31+G\*\*(H) basis sets. Computed by the single-point calculation for its optimized structure in vacuo.<sup>a</sup>

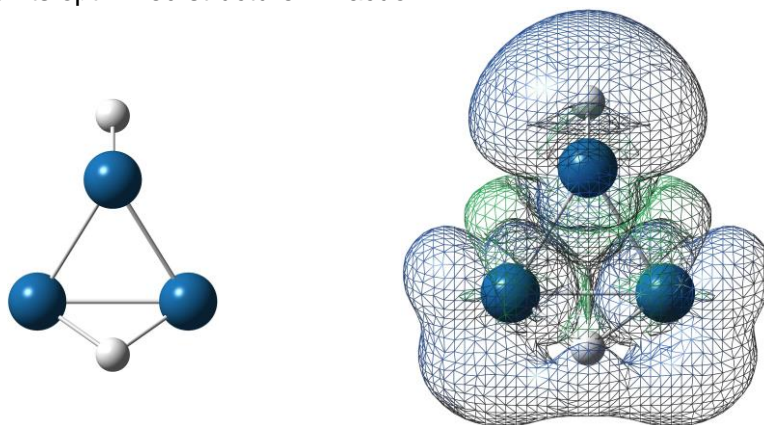

Spin density distribution

| Atom Label | X in angstrom | Y in angstrom | Z in angstrom | Mulliken Charge | Spin Density |
|------------|---------------|---------------|---------------|-----------------|--------------|
| Pt1        | -0.002090     | -0.765408     | 1.322144      | 0.084662        | 0.542208     |
| Pt2        | -0.002090     | 1.520917      | 0.000000      | -0.061169       | 0.828172     |
| Pt3        | -0.002090     | -0.765408     | -1.322144     | 0.084662        | 0.542208     |
| H4         | 1.409325      | 2.190060      | 0.000000      | -0.090031       | 0.069346     |
| H5         | -0.920178     | -1.417855     | 0.000000      | -0.018125       | 0.018066     |

<sup>a</sup>Part of the Gaussian output file:

```

Zero-point correction=          0.013360 (Hartree/Particle)
Thermal correction to Energy=    0.018054
Thermal correction to Enthalpy=  0.018998
Thermal correction to Gibbs Free Energy= -0.022415
Sum of electronic and zero-point Energies= -359.264535
Sum of electronic and thermal Energies= -359.259840
Sum of electronic and thermal Enthalpies= -359.258896
Sum of electronic and thermal Free Energies= -359.300309
  
```

**Table S52.** (A) Geometry optimized for  $[\text{Pt}_3\text{H}_3]^{2+}$  (doublet) computed at the M06 level of DFT using SDD(Pt) and 6-31+G\*\*(H) basis sets in vacuo.<sup>a</sup>

| Atom Label | X in angstrom | Y in angstrom | Z in angstrom | Mulliken Charge | Spin Density |
|------------|---------------|---------------|---------------|-----------------|--------------|
| Pt1        | -1.343638     | -0.724172     | -0.017908     | 0.438895        | 0.344684     |
| Pt2        | 1.301012      | -0.797765     | -0.017899     | 0.438209        | 0.344745     |
| Pt3        | 0.042680      | 1.521590      | 0.016667      | 0.402906        | 0.339886     |
| H4         | -1.237211     | -0.644871     | 1.494779      | 0.237744        | -0.009816    |
| H5         | 0.036596      | 1.385371      | -1.496411     | 0.244520        | -0.009694    |
| H6         | 1.196412      | -0.713469     | 1.494568      | 0.237726        | -0.009804    |

<sup>a</sup>Part of the Gaussian output file:

SCF Done: E(UM06) = -359.069076472 A.U. after 12 cycles  
 Annihilation of the first spin contaminant:  
 S\*\*2 before annihilation 0.7596, after 0.7501

| Item          | Value    | Threshold | Converged? |
|---------------|----------|-----------|------------|
| Maximum Force | 0.000103 | 0.000450  | YES        |
| RMS Force     | 0.000040 | 0.000300  | YES        |

|                | 1        | 2        | 3        |
|----------------|----------|----------|----------|
|                | A        | A        | A        |
| Frequencies -- | 120.1574 | 120.8592 | 183.8488 |
| Red. masses -- | 123.0569 | 122.7060 | 161.3926 |
| Frc consts --  | 1.0468   | 1.0560   | 3.2141   |
| IR Inten --    | 0.1466   | 0.1589   | 0.0068   |

Zero-point correction= 0.024013 (Hartree/Particle)  
 Thermal correction to Energy= 0.030237  
 Thermal correction to Enthalpy= 0.031182  
 Thermal correction to Gibbs Free Energy= -0.012004  
 Sum of electronic and zero-point Energies= -359.045063  
 Sum of electronic and thermal Energies= -359.038839  
 Sum of electronic and thermal Enthalpies= -359.037895  
 Sum of electronic and thermal Free Energies= -359.081080

(B) Summary for the DFT calculation of  $[\text{Pt}_3\text{H}_3]^{2+}$  (doublet) with solvation in water taken into consideration (C-PCM), at the M06 level of DFT with SDD(Pt) and 6-31+G\*\*(H) basis sets. Computed by the single-point calculation for its optimized structure in vacuo.<sup>a</sup>

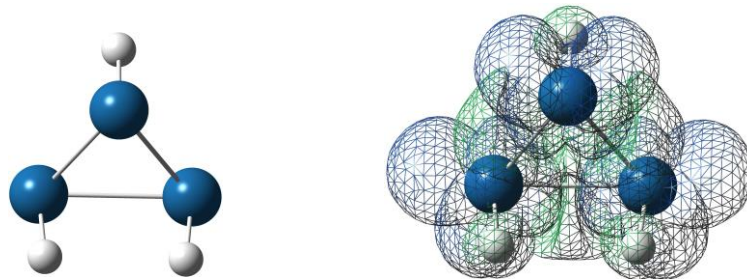

Spin density distribution

| Atom Label | X in angstrom | Y in angstrom | Z in angstrom | Mulliken Charge | Spin Density |
|------------|---------------|---------------|---------------|-----------------|--------------|
| Pt1        | -1.343638     | -0.724172     | -0.017908     | 0.626816        | 0.346610     |
| Pt2        | 1.301012      | -0.797765     | -0.017899     | 0.619361        | 0.346322     |
| Pt3        | 0.042680      | 1.521590      | 0.016667      | 0.563288        | 0.334571     |
| H4         | -1.237212     | -0.644870     | 1.494779      | 0.064111        | -0.009172    |
| H5         | 0.036596      | 1.385371      | -1.496411     | 0.061824        | -0.009174    |
| H6         | 1.196412      | -0.713469     | 1.494568      | 0.064599        | -0.009157    |

<sup>a</sup>Part of the Gaussian output file:

Zero-point correction= 0.023237 (Hartree/Particle)  
 Thermal correction to Energy= 0.029947  
 Thermal correction to Enthalpy= 0.030891  
 Thermal correction to Gibbs Free Energy= -0.014015  
 Sum of electronic and zero-point Energies= -359.574636  
 Sum of electronic and thermal Energies= -359.567927  
 Sum of electronic and thermal Enthalpies= -359.566983  
 Sum of electronic and thermal Free Energies= -359.611889

**Table S53.** (A) Geometry optimized for [Pt<sub>3</sub>H<sub>3</sub>]<sup>+</sup> (triplet) computed at the M06 level of DFT using SDD(Pt) and 6-31+G\*\*(H) basis sets in vacuo.<sup>a</sup>

| Atom Label | X in angstrom | Y in angstrom | Z in angstrom | Mulliken Charge | Spin Density |
|------------|---------------|---------------|---------------|-----------------|--------------|
| Pt1        | 0.788036      | -1.324861     | 0.000565      | 0.097398        | 0.463869     |
| Pt2        | 0.779368      | 1.329599      | 0.000639      | 0.097238        | 0.463630     |
| Pt3        | -1.577490     | -0.004704     | -0.021790     | 0.375161        | 0.925727     |
| H4         | -1.722647     | -0.010816     | 1.516128      | 0.110237        | 0.099916     |
| H5         | 1.380696      | 0.003996      | -0.968264     | 0.144879        | 0.038588     |
| H6         | 1.128733      | 0.004181      | 1.057807      | 0.175088        | 0.008271     |

<sup>a</sup>Part of the Gaussian output file:

SCF Done: E(UM06) = -359.530476843 A.U. after 14 cycles  
 Annihilation of the first spin contaminant:  
 S\*\*2 before annihilation 2.0141, after 2.0001

| Item          | Value    | Threshold | Converged? |
|---------------|----------|-----------|------------|
| Maximum Force | 0.000125 | 0.000450  | YES        |
| RMS Force     | 0.000058 | 0.000300  | YES        |

|                | 1       | 2        | 3        |
|----------------|---------|----------|----------|
|                | A       | A        | A        |
| Frequencies -- | 41.8729 | 128.4558 | 139.7419 |
| Red. masses -- | 2.6874  | 149.0452 | 1.6130   |
| Frc consts --  | 0.0028  | 1.4490   | 0.0186   |
| IR Inten --    | 6.4377  | 0.1512   | 2.9452   |

Zero-point correction= 0.020155 (Hartree/Particle)  
 Thermal correction to Energy= 0.026709  
 Thermal correction to Enthalpy= 0.027653  
 Thermal correction to Gibbs Free Energy= -0.017552  
 Sum of electronic and zero-point Energies= -359.510322  
 Sum of electronic and thermal Energies= -359.503768  
 Sum of electronic and thermal Enthalpies= -359.502824  
 Sum of electronic and thermal Free Energies= -359.548029

(B) Summary for the DFT calculation of  $[\text{Pt}_3\text{H}_3]^+$  (triplet) with solvation in water taken into consideration (C-PCM), at the M06 level of DFT with SDD(Pt) and 6-31+G\*\*(H) basis sets. Computed by the single-point calculation for its optimized structure in vacuo.<sup>a</sup>

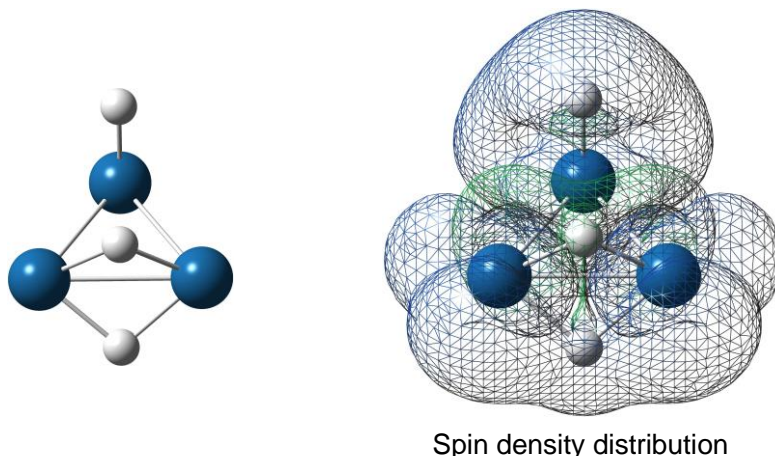

| Atom Label | X in angstrom | Y in angstrom | Z in angstrom | Mulliken Charge | Spin Density |
|------------|---------------|---------------|---------------|-----------------|--------------|
| Pt1        | 0.788036      | -1.324861     | 0.000565      | 0.262278        | 0.473414     |
| Pt2        | 0.779368      | 1.329599      | 0.000639      | 0.262455        | 0.472953     |
| Pt3        | -1.577491     | -0.004704     | -0.021790     | 0.416173        | 0.955229     |
| H4         | -1.722648     | -0.010816     | 1.516128      | -0.057363       | 0.072126     |
| H5         | 1.380696      | 0.003996      | -0.968264     | 0.039408        | 0.024799     |
| H6         | 1.128733      | 0.004181      | 1.057807      | 0.077049        | 0.001478     |

<sup>a</sup>Part of the Gaussian output file:

```

Zero-point correction=          0.019334 (Hartree/Particle)
Thermal correction to Energy=    0.024724
Thermal correction to Enthalpy=  0.025668
Thermal correction to Gibbs Free Energy= -0.016823
Sum of electronic and zero-point Energies= -359.715783
Sum of electronic and thermal Energies= -359.710393
Sum of electronic and thermal Enthalpies= -359.709449
Sum of electronic and thermal Free Energies= -359.751941
    
```

**Table S54.** (A) Geometry optimized for [Pt<sub>3</sub>H<sub>3</sub>] (doublet) computed at the M06 level of DFT using SDD(Pt) and 6-31+G\*\*(H) basis sets in vacuo.<sup>a</sup>

| Atom Label | X in angstrom | Y in angstrom | Z in angstrom | Mulliken Charge | Spin Density |
|------------|---------------|---------------|---------------|-----------------|--------------|
| Pt1        | 0.248664      | 1.479747      | -0.006333     | -0.041086       | 0.485638     |
| Pt2        | -1.485985     | -0.558085     | -0.008050     | -0.140101       | 0.230636     |
| Pt3        | 1.274594      | -0.920891     | 0.021917      | 0.011404        | 0.237926     |
| H4         | -1.171240     | 0.816677      | 0.874052      | 0.088363        | -0.002075    |
| H5         | 1.232730      | -0.828250     | -1.500651     | 0.077532        | 0.010337     |
| H6         | -2.968784     | -0.048570     | 0.038943      | 0.003887        | 0.037538     |

<sup>a</sup>Part of the Gaussian output file:

SCF Done: E(UM06) = -359.828574188 A.U. after 14 cycles  
 Annihilation of the first spin contaminant:  
 S\*\*2 before annihilation 0.7646, after 0.7501

| Item          | Value    | Threshold | Converged? |
|---------------|----------|-----------|------------|
| Maximum Force | 0.000013 | 0.000450  | YES        |
| RMS Force     | 0.000005 | 0.000300  | YES        |

|                | 1       | 2        | 3        |
|----------------|---------|----------|----------|
|                | A       | A        | A        |
| Frequencies -- | 94.1234 | 113.7023 | 168.2943 |
| Red. masses -- | 60.3370 | 38.3147  | 47.6245  |
| Frc consts --  | 0.3149  | 0.2918   | 0.7947   |
| IR Inten --    | 1.0653  | 1.1445   | 0.2366   |

Zero-point correction= 0.021303 (Hartree/Particle)  
 Thermal correction to Energy= 0.027831  
 Thermal correction to Enthalpy= 0.028775  
 Thermal correction to Gibbs Free Energy= -0.015260  
 Sum of electronic and zero-point Energies= -359.807271  
 Sum of electronic and thermal Energies= -359.800744  
 Sum of electronic and thermal Enthalpies= -359.799799  
 Sum of electronic and thermal Free Energies= -359.843834

(B) Summary for the DFT calculation of [Pt<sub>3</sub>H<sub>3</sub>] (doublet) with solvation in water taken into consideration (C-PCM), at the M06 level of DFT with SDD(Pt) and 6-31+G\*\*(H) basis sets. Computed by the single-point calculation for its optimized structure in vacuo.<sup>a</sup>

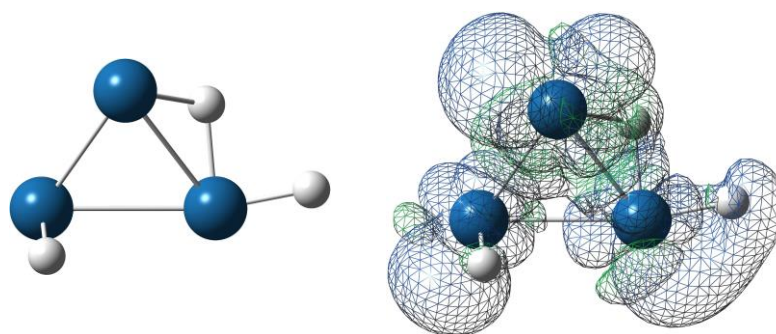

Spin density distribution



| Atom Label | X in angstrom | Y in angstrom | Z in angstrom | Mulliken Charge | Spin Density |
|------------|---------------|---------------|---------------|-----------------|--------------|
| Pt1        | -0.248664     | 1.479747      | 0.006333      | 0.071941        | 0.545429     |
| Pt2        | 1.485985      | -0.558085     | 0.008050      | -0.139030       | 0.227354     |
| Pt3        | -1.274594     | -0.920891     | -0.021917     | 0.168998        | 0.212861     |
| H4         | 1.171241      | 0.816677      | -0.874052     | 0.021127        | -0.010299    |
| H5         | -1.232730     | -0.828250     | 1.500651      | -0.031488       | 0.002484     |
| H6         | 2.968785      | -0.048570     | -0.038943     | -0.091549       | 0.022172     |

<sup>a</sup>Part of the Gaussian output file:

Zero-point correction= 0.020003 (Hartree/Particle)  
 Thermal correction to Energy= 0.027006  
 Thermal correction to Enthalpy= 0.027950  
 Thermal correction to Gibbs Free Energy= -0.017857  
 Sum of electronic and zero-point Energies= -359.870757  
 Sum of electronic and thermal Energies= -359.863755  
 Sum of electronic and thermal Enthalpies= -359.862811  
 Sum of electronic and thermal Free Energies= -359.908618

**Table S55.** (A) Geometry optimized for  $[\text{Pt}_3\text{H}_4]^{2+}$  (singlet) computed at the M06 level of DFT using SDD(Pt) and 6-31+G\*\*(H) basis sets in vacuo.<sup>a</sup>

| Atom Label | X in angstrom | Y in angstrom | Z in angstrom | Mulliken Charge |
|------------|---------------|---------------|---------------|-----------------|
| Pt1        | -1.511534     | 0.724034      | -0.018925     | 0.396982        |
| Pt2        | 0.000296      | -1.465671     | 0.016468      | 0.371483        |
| Pt3        | 1.511233      | 0.724457      | -0.018927     | 0.397115        |
| H4         | 0.000428      | -1.336714     | -1.495052     | 0.235504        |
| H5         | -1.482891     | 0.587501      | 1.492513      | 0.240933        |
| H6         | -0.000033     | 1.500564      | 0.177956      | 0.117008        |
| H7         | 1.482862      | 0.588662      | 1.492582      | 0.240975        |

<sup>a</sup>Part of the Gaussian output file:

SCF Done: E(RM06) = -359.673445554 A.U. after 10 cycles

|               |          |           |            |
|---------------|----------|-----------|------------|
| Item          | Value    | Threshold | Converged? |
| Maximum Force | 0.000038 | 0.000450  | YES        |
| RMS Force     | 0.000016 | 0.000300  | YES        |

|                |         |          |          |
|----------------|---------|----------|----------|
|                | 1       | 2        | 3        |
|                | A       | A        | A        |
| Frequencies -- | 71.7655 | 129.8129 | 157.6130 |
| Red. masses -- | 68.7265 | 148.7793 | 122.5770 |
| Frc consts --  | 0.2085  | 1.4772   | 1.7941   |
| IR Inten --    | 0.0597  | 0.2370   | 0.0003   |

|                                              |                             |
|----------------------------------------------|-----------------------------|
| Zero-point correction=                       | 0.030734 (Hartree/Particle) |
| Thermal correction to Energy=                | 0.037468                    |
| Thermal correction to Enthalpy=              | 0.038412                    |
| Thermal correction to Gibbs Free Energy=     | -0.005510                   |
| Sum of electronic and zero-point Energies=   | -359.642712                 |
| Sum of electronic and thermal Energies=      | -359.635977                 |
| Sum of electronic and thermal Enthalpies=    | -359.635033                 |
| Sum of electronic and thermal Free Energies= | -359.678955                 |

(B) Summary for the DFT calculation of  $[\text{Pt}_3\text{H}_4]^{2+}$  (singlet) with solvation in water taken into consideration (C-PCM), at the M06 level of DFT with SDD(Pt) and 6-31+G\*\*(H) basis sets. Computed by the single-point calculation for its optimized structure in vacuo.<sup>a</sup>

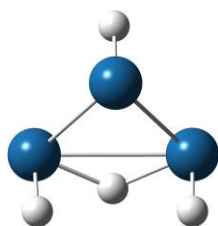

| Atom Label | X in angstrom | Y in angstrom | Z in angstrom | Mulliken Charge |
|------------|---------------|---------------|---------------|-----------------|
| Pt1        | 1.511534      | -0.724034     | -0.018925     | 0.613993        |

|     |           |           |           |          |
|-----|-----------|-----------|-----------|----------|
| Pt2 | -0.000296 | 1.465671  | 0.016468  | 0.553536 |
| Pt3 | -1.511233 | -0.724457 | -0.018927 | 0.614329 |
| H4  | -0.000428 | 1.336714  | -1.495052 | 0.059875 |
| H5  | 1.482891  | -0.587501 | 1.492514  | 0.069533 |
| H6  | 0.000033  | -1.500564 | 0.177956  | 0.019193 |
| H7  | -1.482862 | -0.588662 | 1.492583  | 0.069540 |

-----  
Part of the Gaussian output file:

Zero-point correction= 0.026485 (Hartree/Particle)  
Thermal correction to Energy= 0.032868  
Thermal correction to Enthalpy= 0.033813  
Thermal correction to Gibbs Free Energy= -0.009055  
Sum of electronic and zero-point Energies= -360.158987  
Sum of electronic and thermal Energies= -360.152604  
Sum of electronic and thermal Enthalpies= -360.151660  
Sum of electronic and thermal Free Energies= -360.194527

**Table S56.** (A) Geometry optimized for  $[\text{Pt}_3\text{H}_4]^+$  (doublet) computed at the M06 level of DFT using SDD(Pt) and 6-31+G\*\*(H) basis sets in vacuo.<sup>a</sup>

| Atom Label | X in angstrom | Y in angstrom | Z in angstrom | Mulliken Charge | Spin Density |
|------------|---------------|---------------|---------------|-----------------|--------------|
| Pt1        | 2.337841      | -0.412141     | 0.011451      | 0.176345        | 0.123578     |
| Pt2        | -0.002262     | 0.803726      | 0.003691      | 0.112069        | 0.688051     |
| Pt3        | -2.320420     | -0.412806     | -0.019390     | 0.123896        | 0.170843     |
| H4         | 2.767218      | 1.026681      | -0.245625     | 0.145533        | 0.000241     |
| H5         | 1.111500      | -0.053476     | -1.082578     | 0.111108        | -0.002273    |
| H6         | -2.164373     | -0.306687     | 1.493127      | 0.169384        | 0.006500     |
| H7         | -2.896771     | 0.988694      | 0.166450      | 0.161665        | 0.013059     |

<sup>a</sup>Part of the Gaussian output file:

SCF Done: E(UM06) = -360.143421946 A.U. after 15 cycles  
 Annihilation of the first spin contaminant:  
 S\*\*2 before annihilation 0.7581, after 0.7500

| Item          | Value    | Threshold | Converged? |
|---------------|----------|-----------|------------|
| Maximum Force | 0.000061 | 0.000450  | YES        |
| RMS Force     | 0.000029 | 0.000300  | YES        |

|                | 1       | 2        | 3        |
|----------------|---------|----------|----------|
|                | A       | A        | A        |
| Frequencies -- | 20.7795 | 124.2488 | 163.3892 |
| Red. masses -- | 58.6626 | 84.0290  | 29.7262  |
| Frc consts --  | 0.0149  | 0.7643   | 0.4676   |
| IR Inten --    | 0.0478  | 0.0676   | 0.2671   |

Zero-point correction= 0.029235 (Hartree/Particle)  
 Thermal correction to Energy= 0.036631  
 Thermal correction to Enthalpy= 0.037575  
 Thermal correction to Gibbs Free Energy= -0.009301  
 Sum of electronic and zero-point Energies= -360.114187  
 Sum of electronic and thermal Energies= -360.106791  
 Sum of electronic and thermal Enthalpies= -360.105847  
 Sum of electronic and thermal Free Energies= -360.152723

(B) Summary for the DFT calculation of  $[\text{Pt}_3\text{H}_4]^+$  (doublet) with solvation in water taken into consideration (C-PCM), at the M06 level of DFT with SDD(Pt) and 6-31+G\*\*(H) basis sets. Computed by the single-point calculation for its optimized structure in vacuo.<sup>a</sup>

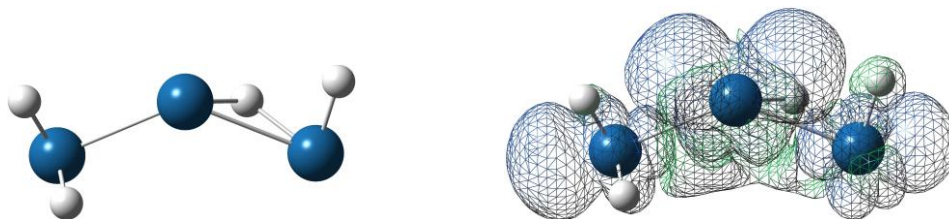

Spin density distribution

| Atom Label | X in angstrom | Y in angstrom | Z in angstrom | Mulliken Charge | Spin Density |
|------------|---------------|---------------|---------------|-----------------|--------------|
| Pt1        | 2.337842      | -0.412141     | 0.011451      | 0.319537        | 0.108166     |
| Pt2        | -0.002262     | 0.803726      | 0.003691      | 0.128814        | 0.710051     |
| Pt3        | -2.320420     | -0.412806     | -0.019390     | 0.434090        | 0.181079     |
| H4         | 2.767219      | 1.026681      | -0.245625     | 0.022976        | -0.004660    |
| H5         | 1.111500      | -0.053476     | -1.082578     | 0.015346        | -0.004923    |
| H6         | -2.164373     | -0.306687     | 1.493127      | 0.042206        | 0.003821     |
| H7         | -2.896771     | 0.988695      | 0.166450      | 0.037031        | 0.006467     |

<sup>a</sup>Part of the Gaussian output file:

Zero-point correction= 0.027219 (Hartree/Particle)  
 Thermal correction to Energy= 0.033173  
 Thermal correction to Enthalpy= 0.034117  
 Thermal correction to Gibbs Free Energy= -0.009062  
 Sum of electronic and zero-point Energies= -360.310935  
 Sum of electronic and thermal Energies= -360.304981  
 Sum of electronic and thermal Enthalpies= -360.304037  
 Sum of electronic and thermal Free Energies= -360.347216

**Table S57.** (A) Geometry optimized for [Pt<sub>3</sub>H<sub>4</sub>] (singlet) computed at the M06 level of DFT using SDD(Pt) and 6-31+G\*\*(H) basis sets in vacuo.<sup>a</sup>

| Atom Label | X in angstrom | Y in angstrom | Z in angstrom | Mulliken Charge |
|------------|---------------|---------------|---------------|-----------------|
| Pt1        | -0.931784     | -1.225300     | -0.020610     | -0.023579       |
| Pt2        | 1.617616      | -0.121996     | 0.015534      | -0.136486       |
| Pt3        | -0.711745     | 1.329508      | -0.002603     | -0.090270       |
| H4         | 2.901456      | 0.700703      | 0.314870      | 0.040597        |
| H5         | -0.851514     | -1.079990     | 1.493195      | 0.101677        |
| H6         | 2.219856      | 0.261434      | -1.334526     | 0.083855        |
| H7         | -2.248648     | 1.505344      | 0.125461      | 0.024206        |

<sup>a</sup>Part of the Gaussian output file:

SCF Done: E(RM06) = -360.436583637 A.U. after 12 cycles

| Item          | Value    | Threshold | Converged? |
|---------------|----------|-----------|------------|
| Maximum Force | 0.000009 | 0.000450  | YES        |
| RMS Force     | 0.000003 | 0.000300  | YES        |

|                | 1       | 2        | 3        |
|----------------|---------|----------|----------|
|                | A       | A        | A        |
| Frequencies -- | 93.7121 | 116.2374 | 170.5473 |
| Red. masses -- | 70.1319 | 49.6869  | 1.3408   |
| Frc consts --  | 0.3629  | 0.3955   | 0.0230   |
| IR Inten --    | 1.7505  | 0.3756   | 7.0155   |

Zero-point correction= 0.030401 (Hartree/Particle)  
 Thermal correction to Energy= 0.037632  
 Thermal correction to Enthalpy= 0.038576  
 Thermal correction to Gibbs Free Energy= -0.006017  
 Sum of electronic and zero-point Energies= -360.406183  
 Sum of electronic and thermal Energies= -360.398952  
 Sum of electronic and thermal Enthalpies= -360.398008  
 Sum of electronic and thermal Free Energies= -360.442601

(B) Summary for the DFT calculation of [Pt<sub>3</sub>H<sub>4</sub>] (singlet) with solvation in water taken into consideration (C-PCM), at the M06 level of DFT with SDD(Pt) and 6-31+G\*\*(H) basis sets. Computed by the single-point calculation for its optimized structure in vacuo.<sup>a</sup>

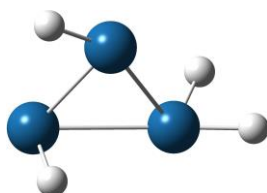

| Atom Label | X in angstrom | Y in angstrom | Z in angstrom | Mulliken Charge |
|------------|---------------|---------------|---------------|-----------------|
| Pt1        | -0.931784     | -1.225300     | -0.020610     | 0.257085        |
| Pt2        | 1.617616      | -0.121996     | 0.015534      | -0.047477       |

|     |           |           |           |           |
|-----|-----------|-----------|-----------|-----------|
| Pt3 | -0.711745 | 1.329508  | -0.002603 | -0.134612 |
| H4  | 2.901456  | 0.700703  | 0.314870  | -0.029679 |
| H5  | -0.851514 | -1.079990 | 1.493195  | 0.005224  |
| H6  | 2.219856  | 0.261434  | -1.334526 | 0.014759  |
| H7  | -2.248648 | 1.505344  | 0.125461  | -0.065300 |

-----  
<sup>a</sup>Part of the Gaussian output file:

Zero-point correction= 0.029563 (Hartree/Particle)  
Thermal correction to Energy= 0.037248  
Thermal correction to Enthalpy= 0.038192  
Thermal correction to Gibbs Free Energy= -0.007936  
Sum of electronic and zero-point Energies= -360.479005  
Sum of electronic and thermal Energies= -360.471320  
Sum of electronic and thermal Enthalpies= -360.470376  
Sum of electronic and thermal Free Energies= -360.516505

**Table S58.** (A) Geometry optimized for  $[\text{Pt}_3\text{H}_5]^{2+}$  (doublet) computed at the M06 level of DFT using SDD(Pt) and 6-31+G\*\*(H) basis sets in vacuo.<sup>a</sup>

| Atom Label | X in angstrom | Y in angstrom | Z in angstrom | Mulliken Charge | Spin Density |
|------------|---------------|---------------|---------------|-----------------|--------------|
| Pt1        | -2.402254     | -0.359782     | 0.004070      | 0.274897        | 0.229907     |
| Pt2        | -0.000308     | 0.676265      | -0.012229     | 0.342113        | 0.526671     |
| Pt3        | 2.402257      | -0.360591     | -0.001257     | 0.276509        | 0.230743     |
| H4         | -0.001762     | 0.439348      | 1.488926      | 0.206483        | -0.013913    |
| H5         | -2.581041     | 0.481366      | -1.256425     | 0.223587        | 0.006401     |
| H6         | 2.655543      | 0.694731      | -1.075551     | 0.222957        | 0.006586     |
| H7         | 2.656058      | 0.839960      | 0.910423      | 0.226813        | 0.006707     |
| H8         | -2.705052     | 0.985107      | 0.667037      | 0.226641        | 0.006898     |

<sup>a</sup>Part of the Gaussian output file:

SCF Done: E(UM06) = -360.282590140 A.U. after 15 cycles  
 Annihilation of the first spin contaminant:  
 S\*\*2 before annihilation 0.7570, after 0.7500

| Item          | Value    | Threshold | Converged? |
|---------------|----------|-----------|------------|
| Maximum Force | 0.000022 | 0.000450  | YES        |
| RMS Force     | 0.000008 | 0.000300  | YES        |

|                | 1       | 2        | 3        |
|----------------|---------|----------|----------|
|                | A       | A        | A        |
| Frequencies -- | 33.2859 | 123.3457 | 172.8621 |
| Red. masses -- | 71.5479 | 67.2562  | 56.0912  |
| Frc consts --  | 0.0467  | 0.6029   | 0.9875   |
| IR Inten --    | 0.1120  | 0.0089   | 1.2002   |

Zero-point correction= 0.038679 (Hartree/Particle)  
 Thermal correction to Energy= 0.046561  
 Thermal correction to Enthalpy= 0.047506  
 Thermal correction to Gibbs Free Energy= 0.000384  
 Sum of electronic and zero-point Energies= -360.243911  
 Sum of electronic and thermal Energies= -360.236029  
 Sum of electronic and thermal Enthalpies= -360.235085  
 Sum of electronic and thermal Free Energies= -360.282206

(B) Summary for the DFT calculation of  $[\text{Pt}_3\text{H}_5]^{2+}$  (doublet) with solvation in water taken into consideration (C-PCM), at the M06 level of DFT with SDD(Pt) and 6-31+G\*\*(H) basis sets. Computed by the single-point calculation for its optimized structure in vacuo.<sup>a</sup>

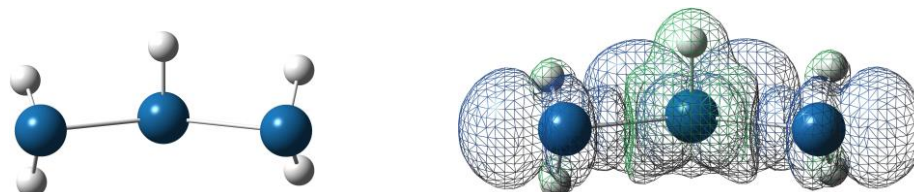

Spin density distribution



| Atom Label | X in angstrom | Y in angstrom | Z in angstrom | Mulliken Charge | Spin Density |
|------------|---------------|---------------|---------------|-----------------|--------------|
| Pt1        | -2.402254     | -0.359782     | 0.004070      | 0.565048        | 0.206050     |
| Pt2        | -0.000308     | 0.676265      | -0.012229     | 0.524082        | 0.596025     |
| Pt3        | 2.402257      | -0.360591     | -0.001257     | 0.565803        | 0.204553     |
| H4         | -0.001762     | 0.439348      | 1.488926      | 0.063919        | -0.015142    |
| H5         | -2.581041     | 0.481366      | -1.256426     | 0.068952        | 0.001921     |
| H6         | 2.655543      | 0.694731      | -1.075551     | 0.068369        | 0.001713     |
| H7         | 2.656058      | 0.839960      | 0.910423      | 0.072242        | 0.002436     |
| H8         | -2.705052     | 0.985107      | 0.667037      | 0.071586        | 0.002443     |

<sup>a</sup>Part of the Gaussian output file:

Zero-point correction= 0.036111 (Hartree/Particle)  
 Thermal correction to Energy= 0.042157  
 Thermal correction to Enthalpy= 0.043101  
 Thermal correction to Gibbs Free Energy= -0.000046  
 Sum of electronic and zero-point Energies= -360.740178  
 Sum of electronic and thermal Energies= -360.734132  
 Sum of electronic and thermal Enthalpies= -360.733188  
 Sum of electronic and thermal Free Energies= -360.776335

**Table S59.** (A) Geometry optimized for  $[\text{Pt}_3\text{H}_5]^+$  (singlet) computed at the M06 level of DFT using SDD(Pt) and 6-31+G\*\*(H) basis sets in vacuo.<sup>a</sup>

| Atom Label | X in angstrom | Y in angstrom | Z in angstrom | Mulliken Charge |
|------------|---------------|---------------|---------------|-----------------|
| Pt1        | -1.645226     | 0.594489      | 0.018873      | 0.172017        |
| Pt2        | 1.500022      | 0.814295      | -0.017873     | 0.194090        |
| Pt3        | 0.113577      | -1.375855     | -0.002231     | 0.096535        |
| H4         | 1.436097      | 0.619493      | 1.487426      | 0.165869        |
| H5         | -1.507966     | 0.413043      | -1.489336     | 0.152407        |
| H6         | 1.370381      | -2.510478     | -0.376839     | 0.069410        |
| H7         | 1.357719      | -2.475034     | 0.489426      | 0.075702        |
| H8         | -0.189224     | 1.384485      | -0.014651     | 0.073971        |

<sup>a</sup>Part of the Gaussian output file:

SCF Done: E(RM06) = -360.755349193 A.U. after 9 cycles

| Item          | Value    | Threshold | Converged? |
|---------------|----------|-----------|------------|
| Maximum Force | 0.000026 | 0.000450  | YES        |
| RMS Force     | 0.000009 | 0.000300  | YES        |

|                | 1       | 2        | 3        |
|----------------|---------|----------|----------|
|                | A       | A        | A        |
| Frequencies -- | 65.8270 | 145.3063 | 168.2850 |
| Red. masses -- | 45.9970 | 53.6170  | 39.3795  |
| Frc consts --  | 0.1174  | 0.6670   | 0.6571   |
| IR Inten --    | 0.3011  | 0.1951   | 0.1524   |

Zero-point correction= 0.038200 (Hartree/Particle)  
 Thermal correction to Energy= 0.045774  
 Thermal correction to Enthalpy= 0.046719  
 Thermal correction to Gibbs Free Energy= 0.001437  
 Sum of electronic and zero-point Energies= -360.717149  
 Sum of electronic and thermal Energies= -360.709575  
 Sum of electronic and thermal Enthalpies= -360.708631  
 Sum of electronic and thermal Free Energies= -360.753912

(B) Summary for the DFT calculation of  $[\text{Pt}_3\text{H}_5]^+$  (singlet) with solvation in water taken into consideration (C-PCM), at the M06 level of DFT with SDD(Pt) and 6-31+G\*\*(H) basis sets. Computed by the single-point calculation for its optimized structure in vacuo.<sup>a</sup>

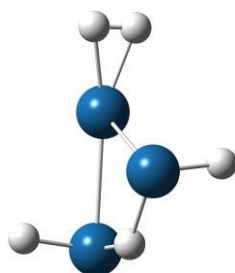

| Atom Label | X in angstrom | Y in angstrom | Z in angstrom | Mulliken Charge |
|------------|---------------|---------------|---------------|-----------------|
| Pt1        | 1.645226      | -0.594489     | 0.018873      | 0.400621        |
| Pt2        | -1.500022     | -0.814295     | -0.017873     | 0.438860        |
| Pt3        | -0.113577     | 1.375855      | -0.002231     | 0.043531        |
| H4         | -1.436098     | -0.619494     | 1.487426      | 0.037351        |
| H5         | 1.507966      | -0.413043     | -1.489336     | 0.022401        |
| H6         | -1.370381     | 2.510479      | -0.376839     | 0.022653        |
| H7         | -1.357719     | 2.475034      | 0.489427      | 0.026529        |
| H8         | 0.189224      | -1.384485     | -0.014651     | 0.008052        |

<sup>a</sup>Part of the Gaussian output file:

Zero-point correction= 0.035154 (Hartree/Particle)  
 Thermal correction to Energy= 0.041623  
 Thermal correction to Enthalpy= 0.042568  
 Thermal correction to Gibbs Free Energy= -0.001059  
 Sum of electronic and zero-point Energies= -360.903379  
 Sum of electronic and thermal Energies= -360.896910  
 Sum of electronic and thermal Enthalpies= -360.895966  
 Sum of electronic and thermal Free Energies= -360.939593

**Table S60.** (A) Geometry optimized for [Pt<sub>3</sub>H<sub>5</sub>] (doublet) computed at the M06 level of DFT using SDD(Pt) and 6-31+G\*\*(H) basis sets in vacuo.<sup>a</sup>

| Atom Label | X in angstrom | Y in angstrom | Z in angstrom | Mulliken Charge | Spin Density |
|------------|---------------|---------------|---------------|-----------------|--------------|
| Pt1        | 0.832878      | -1.290539     | 0.009628      | -0.097021       | 0.363338     |
| Pt2        | 0.757369      | 1.380192      | -0.011234     | -0.031348       | 0.485076     |
| Pt3        | -1.575650     | -0.039229     | -0.011636     | -0.205014       | 0.067807     |
| H4         | -0.357711     | 1.431612      | 1.109048      | 0.060116        | 0.038599     |
| H5         | 1.858177      | -1.776496     | -1.037452     | 0.081580        | 0.026280     |
| H6         | -2.286709     | -0.956426     | 0.999049      | 0.076923        | 0.000445     |
| H7         | -2.561442     | -1.032028     | -0.691888     | 0.047635        | 0.013692     |
| H8         | 2.209071      | -1.599758     | 0.654057      | 0.067130        | 0.004762     |

<sup>a</sup>Part of the Gaussian output file:

SCF Done: E(UM06) = -361.037576411 A.U. after 14 cycles  
 Annihilation of the first spin contaminant:  
 S\*\*2 before annihilation 0.7553, after 0.7500

| Item          | Value    | Threshold | Converged? |
|---------------|----------|-----------|------------|
| Maximum Force | 0.000015 | 0.000450  | YES        |
| RMS Force     | 0.000006 | 0.000300  | YES        |

|                | 1        | 2        | 3        |
|----------------|----------|----------|----------|
|                | A        | A        | A        |
| Frequencies -- | 105.1944 | 112.5263 | 154.3591 |
| Red. masses -- | 24.6215  | 47.0978  | 40.2101  |
| Frc consts --  | 0.1605   | 0.3514   | 0.5645   |
| IR Inten --    | 1.8633   | 1.6913   | 0.1023   |

Zero-point correction= 0.035900 (Hartree/Particle)  
 Thermal correction to Energy= 0.044035  
 Thermal correction to Enthalpy= 0.044979  
 Thermal correction to Gibbs Free Energy= -0.001818  
 Sum of electronic and zero-point Energies= -361.001676  
 Sum of electronic and thermal Energies= -360.993541  
 Sum of electronic and thermal Enthalpies= -360.992597  
 Sum of electronic and thermal Free Energies= -361.039394

(B) Summary for the DFT calculation of  $[\text{Pt}_3\text{H}_5]$  (doublet) with solvation in water taken into consideration (C-PCM), at the M06 level of DFT with SDD(Pt) and 6-31+G\*\*(H) basis sets. Computed by the single-point calculation for its optimized structure in vacuo.<sup>a</sup>

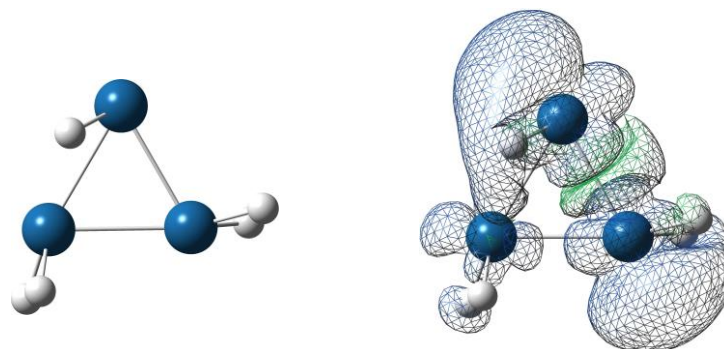

Spin density distribution

| Atom Label | X in angstrom | Y in angstrom | Z in angstrom | Mulliken Charge | Spin Density |
|------------|---------------|---------------|---------------|-----------------|--------------|
| Pt1        | 0.832878      | -1.290539     | 0.009628      | 0.029661        | 0.330918     |
| Pt2        | 0.757369      | 1.380192      | -0.011234     | 0.163860        | 0.562182     |
| Pt3        | -1.575650     | -0.039229     | -0.011636     | -0.178481       | 0.059310     |
| H4         | -0.357711     | 1.431612      | 1.109048      | -0.036375       | 0.020190     |
| H5         | 1.858177      | -1.776497     | -1.037452     | 0.015659        | 0.018130     |
| H6         | -2.286709     | -0.956426     | 0.999050      | 0.019903        | -0.001194    |
| H7         | -2.561442     | -1.032028     | -0.691888     | -0.018689       | 0.010204     |
| H8         | 2.209071      | -1.599758     | 0.654057      | 0.004461        | 0.000260     |

<sup>a</sup>Part of the Gaussian output file:

```

Zero-point correction=          0.033700 (Hartree/Particle)
Thermal correction to Energy=    0.041436
Thermal correction to Enthalpy=   0.042380
Thermal correction to Gibbs Free Energy= -0.004661
Sum of electronic and zero-point Energies= -361.067294
Sum of electronic and thermal Energies= -361.059558
Sum of electronic and thermal Enthalpies= -361.058614
Sum of electronic and thermal Free Energies= -361.105655
  
```

**Table S61.** (A) Geometry optimized for [Pt<sub>3</sub>H<sub>6</sub>]<sup>+</sup> (doublet) computed at the M06 level of DFT using SDD(Pt) and 6-31+G\*\*(H) basis sets in vacuo.<sup>a</sup>

| Atom Label | X in angstrom | Y in angstrom | Z in angstrom | Mulliken Charge | Spin Density |
|------------|---------------|---------------|---------------|-----------------|--------------|
| Pt1        | 0.664090      | 1.397156      | -0.022978     | 0.015940        | 0.437264     |
| Pt2        | 1.000890      | -1.224497     | 0.021736      | -0.008755       | 0.429407     |
| Pt3        | -1.719801     | -0.162844     | 0.020067      | 0.188097        | 0.010401     |
| H4         | 2.522377      | -1.520466     | 0.140874      | 0.110889        | 0.028611     |
| H5         | 2.000039      | 2.184031      | 0.074910      | 0.107156        | 0.022356     |
| H6         | -1.510242     | -0.011164     | -1.480777     | 0.166001        | -0.000884    |
| H7         | -1.046257     | -1.557421     | -0.267053     | 0.110584        | -0.000156    |
| H8         | 0.841722      | 1.602569      | 1.482997      | 0.149153        | 0.033990     |
| H9         | 1.468379      | -1.463059     | -1.419257     | 0.160934        | 0.039011     |

<sup>a</sup>Part of the Gaussian output file:

SCF Done: E(UM06) = -361.344897883 A.U. after 12 cycles

Annihilation of the first spin contaminant:

S\*\*2 before annihilation 0.7546, after 0.7500

| Item          | Value    | Threshold | Converged? |
|---------------|----------|-----------|------------|
| Maximum Force | 0.000035 | 0.000450  | YES        |
| RMS Force     | 0.000012 | 0.000300  | YES        |

|                | 1       | 2       | 3        |
|----------------|---------|---------|----------|
|                | A       | A       | A        |
| Frequencies -- | 70.1436 | 96.0618 | 139.2028 |
| Red. masses -- | 29.2034 | 33.4561 | 1.0520   |
| Frc consts --  | 0.0847  | 0.1819  | 0.0120   |
| IR Inten --    | 0.4227  | 0.2370  | 2.0082   |

Zero-point correction= 0.043328 (Hartree/Particle)  
 Thermal correction to Energy= 0.052295  
 Thermal correction to Enthalpy= 0.053239  
 Thermal correction to Gibbs Free Energy= 0.004368  
 Sum of electronic and zero-point Energies= -361.301570  
 Sum of electronic and thermal Energies= -361.292603  
 Sum of electronic and thermal Enthalpies= -361.291659  
 Sum of electronic and thermal Free Energies= -361.340530

(B) Summary for the DFT calculation of  $[\text{Pt}_3\text{H}_6]^+$  (doublet) with solvation in water taken into consideration (C-PCM), at the M06 level of DFT with SDD(Pt) and 6-31+G\*\*(H) basis sets. Computed by the single-point calculation for its optimized structure in vacuo.<sup>a</sup>

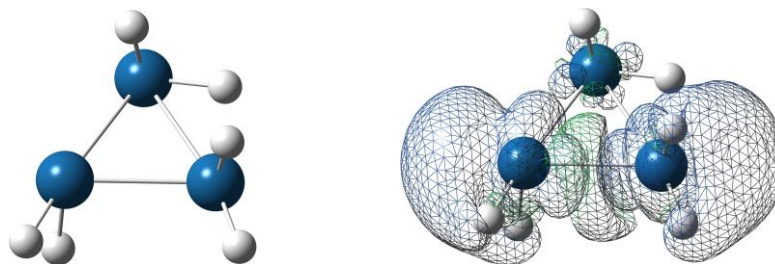

Spin density distribution

| Atom Label | X in angstrom | Y in angstrom | Z in angstrom | Mulliken Charge | Spin Density |
|------------|---------------|---------------|---------------|-----------------|--------------|
| Pt1        | -0.664090     | 1.397156      | 0.022978      | 0.216640        | 0.475944     |
| Pt2        | -1.000890     | -1.224497     | -0.021736     | 0.152817        | 0.435242     |
| Pt3        | 1.719801      | -0.162844     | -0.020067     | 0.524182        | 0.012840     |
| H4         | -2.522378     | -1.520466     | -0.140874     | -0.008060       | 0.021699     |
| H5         | -2.000039     | 2.184031      | -0.074910     | -0.016296       | 0.012336     |
| H6         | 1.510242      | -0.011164     | 1.480778      | 0.039619        | -0.000323    |
| H7         | 1.046257      | -1.557421     | 0.267053      | -0.001996       | -0.000027    |
| H8         | -0.841722     | 1.602570      | -1.482997     | 0.040178        | 0.020335     |
| H9         | -1.468379     | -1.463059     | 1.419257      | 0.052916        | 0.021955     |

<sup>a</sup>Part of the Gaussian output file:

```

Zero-point correction=          0.042853 (Hartree/Particle)
Thermal correction to Energy=    0.049918
Thermal correction to Enthalpy=   0.050862
Thermal correction to Gibbs Free Energy= 0.005661
Sum of electronic and zero-point Energies= -361.508503
Sum of electronic and thermal Energies= -361.501439
Sum of electronic and thermal Enthalpies= -361.500494
Sum of electronic and thermal Free Energies= -361.545695
    
```

**Table S62.** (A) Geometry optimized for [Pt<sub>3</sub>H<sub>6</sub>] (singlet) computed at the M06 level of DFT using SDD(Pt) and 6-31+G\*\*(H) basis sets in vacuo.<sup>a</sup>

| Atom Label | X in angstrom | Y in angstrom | Z in angstrom | Mulliken Charge |
|------------|---------------|---------------|---------------|-----------------|
| Pt1        | 1.471662      | 0.759121      | -0.007450     | -0.128459       |
| Pt2        | -1.383579     | 0.803225      | 0.008087      | -0.267027       |
| Pt3        | -0.016187     | -1.565584     | -0.008883     | -0.035230       |
| H4         | -1.834588     | 2.285256      | 0.183529      | 0.046116        |
| H5         | 0.620295      | 0.610793      | 1.290631      | 0.115913        |
| H6         | -0.795815     | -2.302700     | 1.089704      | 0.079873        |
| H7         | -0.812741     | -2.742006     | -0.631018     | 0.056050        |
| H8         | 0.038398      | 1.432573      | -0.710760     | 0.094127        |
| H9         | -2.823391     | 0.968652      | -0.578907     | 0.038637        |

<sup>a</sup>Part of the Gaussian output file:

SCF Done: E(RM06) = -361.639358932 A.U. after 8 cycles

| Item          | Value    | Threshold | Converged? |
|---------------|----------|-----------|------------|
| Maximum Force | 0.000021 | 0.000450  | YES        |
| RMS Force     | 0.000005 | 0.000300  | YES        |

|                | 1       | 2        | 3        |
|----------------|---------|----------|----------|
|                | A       | A        | A        |
| Frequencies -- | 84.8221 | 102.7516 | 134.4904 |
| Red. masses -- | 6.1509  | 30.3637  | 1.6873   |
| Frc consts --  | 0.0261  | 0.1889   | 0.0180   |
| IR Inten --    | 3.0801  | 2.8152   | 3.1229   |

Zero-point correction= 0.042406 (Hartree/Particle)  
 Thermal correction to Energy= 0.051105  
 Thermal correction to Enthalpy= 0.052050  
 Thermal correction to Gibbs Free Energy= 0.004546  
 Sum of electronic and zero-point Energies= -361.596953  
 Sum of electronic and thermal Energies= -361.588254  
 Sum of electronic and thermal Enthalpies= -361.587309  
 Sum of electronic and thermal Free Energies= -361.634813

(B) Summary for the DFT calculation of [Pt<sub>3</sub>H<sub>6</sub>] (singlet) with solvation in water taken into consideration (C-PCM), at the M06 level of DFT with SDD(Pt) and 6-31+G\*\*(H) basis sets. Computed by the single-point calculation for its optimized structure in vacuo.<sup>a</sup>

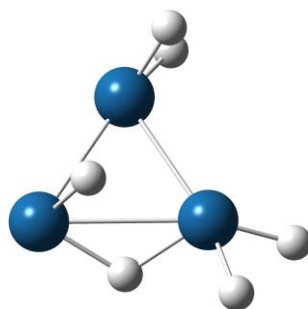



| Atom Label | X in angstrom | Y in angstrom | Z in angstrom | Mulliken Charge |
|------------|---------------|---------------|---------------|-----------------|
| Pt1        | -1.471662     | -0.759121     | -0.007450     | 0.195899        |
| Pt2        | 1.383579      | -0.803225     | 0.008087      | -0.294343       |
| Pt3        | 0.016187      | 1.565584      | -0.008883     | 0.040175        |
| H4         | 1.834589      | -2.285257     | 0.183529      | 0.000146        |
| H5         | -0.620295     | -0.610793     | 1.290631      | 0.041887        |
| H6         | 0.795815      | 2.302701      | 1.089704      | 0.018839        |
| H7         | 0.812741      | 2.742007      | -0.631018     | -0.007326       |
| H8         | -0.038398     | -1.432573     | -0.710760     | 0.033909        |
| H9         | 2.823391      | -0.968652     | -0.578907     | -0.029186       |

<sup>a</sup>Part of the Gaussian output file:

Zero-point correction= 0.042598 (Hartree/Particle)  
 Thermal correction to Energy= 0.049929  
 Thermal correction to Enthalpy= 0.050873  
 Thermal correction to Gibbs Free Energy= 0.006059  
 Sum of electronic and zero-point Energies= -361.663680  
 Sum of electronic and thermal Energies= -361.656349  
 Sum of electronic and thermal Enthalpies= -361.655405  
 Sum of electronic and thermal Free Energies= -361.700219

**Table S63.** (A) Geometry optimized for  $[\text{Pt}_3\text{H}_7]^+$  (singlet) computed at the M06 level of DFT using SDD(Pt) and 6-31+G\*\*(H) basis sets in vacuo.<sup>a</sup>

| Atom Label | X in angstrom | Y in angstrom | Z in angstrom | Mulliken Charge |
|------------|---------------|---------------|---------------|-----------------|
| Pt1        | 0.773389      | -1.345244     | -0.006307     | -0.174324       |
| Pt2        | -1.722823     | 0.061734      | -0.016721     | 0.206229        |
| Pt3        | 0.891578      | 1.325079      | -0.017168     | -0.059335       |
| H4         | -1.375110     | -0.230271     | 1.437783      | 0.174722        |
| H5         | 0.383706      | -2.643756     | -0.739191     | 0.169529        |
| H6         | 2.394914      | 1.715160      | -0.121006     | 0.092661        |
| H7         | 1.436382      | 1.004842      | 1.378979      | 0.152049        |
| H8         | 0.621819      | -2.536254     | 0.953909      | 0.186583        |
| H9         | -1.102894     | 1.470788      | 0.362375      | 0.106338        |
| H10        | 2.153973      | -2.022950     | -0.137537     | 0.145548        |

<sup>a</sup>Part of the Gaussian output file:

SCF Done: E(RM06) = -361.957231798 A.U. after 11 cycles

| Item          | Value    | Threshold | Converged? |
|---------------|----------|-----------|------------|
| Maximum Force | 0.000045 | 0.000450  | YES        |
| RMS Force     | 0.000015 | 0.000300  | YES        |

|                | 1       | 2       | 3        |
|----------------|---------|---------|----------|
|                | A       | A       | A        |
| Frequencies -- | 78.2956 | 97.5002 | 141.4567 |
| Red. masses -- | 49.4884 | 31.3282 | 6.5894   |
| Frc consts --  | 0.1787  | 0.1755  | 0.0777   |
| IR Inten --    | 0.4805  | 0.7426  | 3.0669   |

Zero-point correction= 0.053574 (Hartree/Particle)  
 Thermal correction to Energy= 0.062368  
 Thermal correction to Enthalpy= 0.063312  
 Thermal correction to Gibbs Free Energy= 0.015690  
 Sum of electronic and zero-point Energies= -361.903658  
 Sum of electronic and thermal Energies= -361.894864  
 Sum of electronic and thermal Enthalpies= -361.893920  
 Sum of electronic and thermal Free Energies= -361.941542

(B) Summary for the DFT calculation of  $[\text{Pt}_3\text{H}_7]^+$  (singlet) with solvation in water taken into consideration (C-PCM), at the M06 level of DFT with SDD(Pt) and 6-31+G\*\*(H) basis sets. Computed by the single-point calculation for its optimized structure in vacuo.<sup>a</sup>

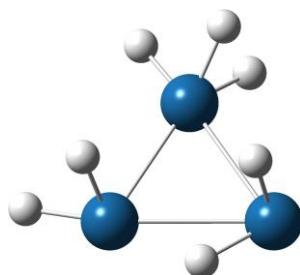

| Atom Label | X in angstrom | Y in angstrom | Z in angstrom | Mulliken Charge |
|------------|---------------|---------------|---------------|-----------------|
| Pt1        | -0.773389     | 1.345244      | -0.006307     | 0.072245        |
| Pt2        | 1.722823      | -0.061734     | -0.016721     | 0.569487        |
| Pt3        | -0.891578     | -1.325080     | -0.017168     | 0.041644        |
| H4         | 1.375110      | 0.230272      | 1.437783      | 0.050832        |
| H5         | -0.383706     | 2.643756      | -0.739191     | 0.090191        |
| H6         | -2.394914     | -1.715160     | -0.121006     | -0.028801       |
| H7         | -1.436383     | -1.004842     | 1.378979      | 0.052672        |
| H8         | -0.621819     | 2.536254      | 0.953909      | 0.109143        |
| H9         | 1.102894      | -1.470788     | 0.362375      | -0.004157       |
| H10        | -2.153973     | 2.022950      | -0.137537     | 0.046745        |

<sup>a</sup>Part of the Gaussian output file:

Zero-point correction= 0.050589 (Hartree/Particle)  
 Thermal correction to Energy= 0.059266  
 Thermal correction to Enthalpy= 0.060210  
 Thermal correction to Gibbs Free Energy= 0.011828  
 Sum of electronic and zero-point Energies= -362.101667  
 Sum of electronic and thermal Energies= -362.092990  
 Sum of electronic and thermal Enthalpies= -362.092046  
 Sum of electronic and thermal Free Energies= -362.140428

**Table S64.** Geometry optimized for [Pt<sub>4</sub>] (triplet) computed at the M06 level of DFT using SDD(Pt) basis set in vacuo.<sup>a</sup>

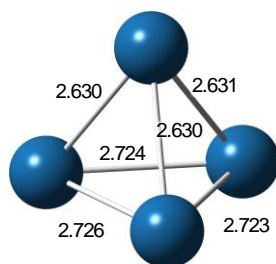

| Atom Label | X in angstrom | Y in angstrom | Z in angstrom | Mulliken Charge | Spin Density |
|------------|---------------|---------------|---------------|-----------------|--------------|
| Pt1        | 0.009231      | 0.016437      | -1.581504     | -0.093861       | 0.624393     |
| Pt2        | 1.487076      | 0.499599      | 0.539706      | 0.032194        | 0.457629     |
| Pt3        | -0.309863     | -1.546171     | 0.511132      | 0.029994        | 0.459661     |
| Pt4        | -1.186443     | 1.030134      | 0.530666      | 0.031674        | 0.458318     |

<sup>a</sup>Part of the Gaussian output file:

SCF Done: E(UM06) = -477.412674205 A.U. after 23 cycles

Annihilation of the first spin contaminant:

S\*\*2 before annihilation 2.0240, after 2.0003

| Item          | Value    | Threshold | Converged? |
|---------------|----------|-----------|------------|
| Maximum Force | 0.000125 | 0.000450  | YES        |
| RMS Force     | 0.000068 | 0.000300  | YES        |

|                | 1        | 2        | 3        |
|----------------|----------|----------|----------|
|                | A        | A        | A        |
| Frequencies -- | 57.0764  | 60.0329  | 126.1458 |
| Red. masses -- | 194.9648 | 194.9648 | 194.9648 |
| Frc consts --  | 0.3742   | 0.4140   | 1.8279   |
| IR Inten --    | 0.0054   | 0.0038   | 0.0003   |

**Table S65.** Geometry optimized for [Pt<sub>5</sub>] (triplet) computed at the M06 level of DFT using SDD(Pt) basis set in vacuo.<sup>a</sup>

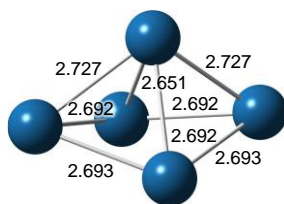

| Atom Label | X in angstrom | Y in angstrom | Z in angstrom | Mulliken Charge | Spin Density |
|------------|---------------|---------------|---------------|-----------------|--------------|
| Pt1        | 0.000035      | 1.458268      | 0.673682      | 0.040690        | 0.382949     |
| Pt2        | -2.187471     | 0.000935      | 0.091261      | 0.021538        | 0.311228     |
| Pt3        | 2.187098      | 0.000951      | 0.091443      | 0.021451        | 0.311848     |
| Pt4        | 0.000059      | -1.455097     | 0.680610      | 0.040679        | 0.382330     |
| Pt5        | 0.000279      | -0.005057     | -1.536997     | -0.124358       | 0.611644     |

<sup>a</sup>Part of the Gaussian output file:

SCF Done: E(UM06) = -596.784114941 A.U. after 29 cycles

Annihilation of the first spin contaminant:

S\*\*2 before annihilation 2.0403, after 2.0009

| Item          | Value    | Threshold | Converged? |
|---------------|----------|-----------|------------|
| Maximum Force | 0.000121 | 0.000450  | YES        |
| RMS Force     | 0.000071 | 0.000300  | YES        |

|                | 1        | 2        | 3        |
|----------------|----------|----------|----------|
|                | A        | A        | A        |
| Frequencies -- | 43.4295  | 73.8195  | 76.2746  |
| Red. masses -- | 194.9648 | 194.9648 | 194.9648 |
| Frc consts --  | 0.2167   | 0.6260   | 0.6683   |
| IR Inten --    | 0.0182   | 0.0266   | 0.3486   |

## References

- S1. J. T. Muckerman, J. H. Skone, M. Ning and Y. Wasada-Tsutsui, *Biochim. Biophys. Acta.*, 2013, **1827**, 882-891.
- S2. T. G. Appleton, A. J. Bailey, K. J. Baraham and J. R. Hall, *Inorg. Chem.*, 1992, **31**, 3077-3082.
- S3. T. G. Appleton, J. R. Hall, S. F. Ralph and C. S. M. Thompson, *Inorg. Chem.*, 1989, **28**, 1989-1993.
- S4. J. Y. Kim, C. Lee and J. W. Park, *J. Electroanal. Chem.*, 2001, **504**, 104-110.
- S5. C. L. Bentley, A. M. Bond, A. F. Hollenkamp, P. J. Mahon and J. Zhang, *J. Phys. Chem. C*, 2015, **119**, 22392-22403.
- S6. G. Boschloo and A. Hagfeldt, *Acc. Chem. Res.*, 2009, **42**, 1819-1826.
- S7. K. Sakai and H. Ozawa, *Coord. Chem. Rev.*, 2007, **251**, 2753-2766.
- S8. Y. Waseda, K. Hirata and M. Ohtani, *High Temp. High Press.*, 1975, **7**, 221-226.
- S9. E. S. Wiedner, M. B. Chambers, C. L. Pitman, R. M. Bullock, A. J. M. Miller and A. M. Appel, *Chem. Rev.*, 2016, **116**, 8655-8692.
- S10. B. H. Solis and S. Hammes-Schiffer, *Inorg. Chem.*, 2011, **50**, 11252-11262.
- S11. K. Koshiba, K. Yamauchi and K. Sakai, *Dalton Trans.*, 2019, **48**, 635-640.
